# Supplementary material
Source: MDPI journal article supplement (https://www.mdpi.com/2075-163X/10/12/1131)
Supplement: s1 [file s1]

## Sheet: slag
Nom	Site	Région	Na (%)	Mg (%)	Al (%)	Si (%)	P (%)	K (%)	Ca (%)	Mn (%)	Fe (%)	Co (ppm)	Ni (ppm)	Cu (ppm)	Zn (ppm)	As (ppm)	Rb (ppm)	Sr (ppm)	Y (ppm)	Zr (ppm)	Nb (ppm)	Mo (ppm)	Sn (ppm)	Sb (ppm)	Cs (ppm)	Ba (ppm)	La (ppm)	Ce (ppm)	Pr (ppm)	Nd (ppm)	Sm (ppm)	Eu (ppm)	Gd (ppm)	Tb (ppm)	Dy (ppm)	Ho (ppm)	Er (ppm)	Tm (ppm)	Yb (ppm)	Lu (ppm)	Hf (ppm)	Ta (ppm)	W (ppm)	Pb (ppm)	Bi (ppm)	Th (ppm)	U (ppm)	Sc (ppm)	Ti (ppm)
BA0001	Barbotzies	Allogny	0.07	0.25	6.15	15.1	0.26	1.09	1.2	0.66	35.14	8	6	4	29	6	60	135	57	242	12	ND	4	ND	2	402	59	152	15	68	17	4	15	3	16	3	8	1	8	1	7	ND	2	7	ND	35	11	33	3331
BA0002	Barbotzies	Allogny	ND	0.31	6.55	15.95	0.54	1.2	1.09	0.58	32.98	11	6	14	158	6	103	62	61	212	11	ND	4	ND	4	440	82	335	26	116	28	6	21	4	20	3	9	1	10	1	5	1	3	11	ND	45	28	37	2529
BA0003	Barbotzies	Allogny	0.03	0.33	5.72	14.58	0.35	0.93	1.31	0.68	36.32	9	7	2	54	5	55	81	49	202	10	1	4	ND	2	326	49	123	13	61	14	3	13	2	13	2	7	1	7	1	5	ND	2	4	ND	29	11	30	2892
BA0004	Barbotzies	Allogny	0.02	0.27	5.47	14.94	0.49	1.34	1.82	0.88	34.91	10	6	3	38	2	76	164	67	275	15	ND	4	ND	3	723	76	213	20	95	23	5	20	3	19	4	9	1	10	1	7	ND	3	5	ND	49	19	33	3283
BA0005	Barbotzies	Allogny	0.11	0.57	6.08	18.1	0.6	1.87	3.32	0.78	26.84	10	19	ND	72	7	61	198	54	268	13	2	6	ND	3	944	65	154	17	76	18	4	16	3	16	3	8	1	10	1	9	1	2	20	ND	41	12	28	3346
BA0006	Barbotzies	Allogny	0.05	0.36	5	17.21	0.34	1.04	1.07	0.74	33.46	19	5	4	88	15	48	107	44	204	9	ND	6	ND	2	445	48	119	13	58	14	3	13	2	13	3	7	1	7	1	6	ND	2	4	ND	33	10	27	2409
BA0007	Barbotzies	Allogny	0.03	0.37	5.41	14.56	0.4	1.15	1.76	0.71	36	29	11	19	65	3	51	132	56	243	13	ND	4	ND	5	459	64	158	17	78	18	4	16	3	16	3	8	1	9	1	7	ND	3	6	ND	42	13	29	3000
BA0008	Barbotzies	Allogny	0.02	0.33	6.43	14.24	0.32	1.25	1.81	0.74	35.06	7	5	2	28	2	73	150	62	253	13	ND	4	ND	3	526	63	167	17	82	20	4	18	3	19	4	9	1	10	1	8	ND	2	4	ND	42	15	35	3215
BA0009	Barbotzies	Allogny	0.04	0.29	4.13	8.65	0.25	0.26	0.5	0.44	49.12	111	75	91	48	405	12	41	20	84	5	1	5	2	1	237	25	66	7	31	7	2	6	1	6	1	3	ND	3	ND	3	ND	2	4	ND	17	7	16	1358
BA0010	Barbotzies	Allogny	0.03	0.32	6.35	15.25	0.36	1.16	1.48	0.73	34.04	6	6	3	24	ND	63	152	60	240	13	ND	4	ND	3	502	66	154	17	79	19	4	17	3	17	3	8	1	9	1	7	ND	2	6	ND	39	14	33	3002
BA0011	Barbotzies	Allogny	0	0.4	7.33	13.99	0.38	0.9	1.96	0.9	34	18	11	3	28	2	51	191	49	189	10	ND	4	ND	2	803	49	130	13	63	15	4	14	3	14	3	7	1	8	1	5	ND	2	3	ND	35	12	30	3037
BA0012	Barbotzies	Allogny	0.16	0.42	5.32	15.1	0.4	1.21	3.37	1	33.25	36	8	ND	40	5	63	273	48	187	9	ND	4	ND	3	784	50	138	14	68	16	4	15	2	15	3	7	1	8	1	6	ND	3	ND	ND	37	14	26	2358
BA0013	Barbotzies	Allogny	0.06	0.38	6.08	14.79	0.38	1.09	1.25	0.67	35.27	10	18	16	44	3	63	112	57	225	12	ND	3	ND	3	345	66	156	18	82	19	4	17	3	17	3	9	1	9	1	7	ND	2	5	ND	38	13	33	3327
BA0014	Barbotzies	Allogny	0.03	0.57	3.73	15.02	0.32	0.48	0.83	1.14	38.69	24	11	4	99	9	28	51	44	109	5	ND	4	1	1	483	48	114	16	61	17	3	12	2	12	2	7	1	8	1	3	ND	1	9	ND	20	10	39	1529
BA0015	Barbotzies	Allogny	0.01	0.49	5.58	17.8	0.36	1.4	2.3	0.76	30.09	15	11	2	31	4	121	154	48	207	10	ND	4	ND	2	505	52	123	14	62	16	3	14	2	14	3	7	1	8	1	6	ND	2	9	ND	36	12	31	2593
BA0016	Barbotzies	Allogny	0.06	0.31	5.64	13.53	0.43	0.81	1.3	0.68	37.98	12	8	7	25	5	43	67	44	215	11	ND	5	ND	2	295	47	119	12	56	14	3	12	2	12	2	7	1	7	1	7	ND	3	5	ND	39	13	30	2761
BA0017	Barbotzies	Allogny	0.04	0.5	6.91	17.12	0.41	1.46	3.1	0.86	28.21	8	21	2	22	2	58	162	58	248	12	ND	6	1	2	653	61	152	16	75	18	4	16	3	16	3	8	1	9	1	7	ND	2	3	ND	42	14	36	3031
BA0018	Barbotzies	Allogny	0.16	0.21	6.31	14.47	0.51	1.24	1.44	0.56	35.09	5	3	ND	63	3	89	223	78	244	12	ND	6	ND	6	640	106	251	33	153	35	8	29	5	26	5	13	2	13	2	7	ND	3	3	ND	54	27	37	3554
BL 0001	Bleron	Allogny	0.04	0.49	5.31	13.47	0.54	0.01	2.17	0.97	37.91	6	3	5	63	13	43	81	42	138	8	ND	11	1	3	521	54	130	14	62	14	3	12	2	11	2	5	ND	5	ND	4	ND	2	5	ND	25	7	19	2002
BL 00021	Bleron	Allogny	0.1	0.6	8.23	16.97	0.46	ND	3.15	1.59	27.06	7	5	1	38	3	83	105	68	218	12	ND	6	ND	6	444	77	169	19	87	18	4	18	3	16	3	9	1	8	1	6	ND	1	4	ND	43	9	33	2908
BL 00022	Bleron	Allogny	0.07	0.58	3.62	11.43	0.55	0.02	1.25	1.11	43.75	14	11	9	103	8	37	85	28	111	6	ND	5	ND	4	257	31	81	9	36	8	2	7	1	6	1	4	ND	4	ND	3	ND	2	19	ND	16	5	17	1780
BL 00023	Bleron	Allogny	0.03	0.45	3.48	8.29	0.35	0.28	1.04	0.89	49.47	14	12	22	82	6	23	40	28	98	5	ND	8	1	2	209	25	62	7	33	8	2	7	1	7	1	4	ND	4	ND	3	ND	2	153	ND	15	4	13	1369
BL 0003	Bleron	Allogny	0.03	0.32	4.76	11.71	0.47	0.71	0.73	0.88	42.48	12	11	4	115	7	49	51	50	140	8	ND	5	ND	4	463	46	112	13	58	14	3	13	2	12	2	6	ND	6	ND	4	ND	2	14	ND	21	5	17	1847
BL 0003	Bleron	Allogny	0.03	0.49	5.24	14.15	0.55	ND	0.56	1.06	38.46	19	23	8	158	14	35	31	39	129	9	ND	5	ND	4	300	37	132	11	46	12	3	10	2	10	2	5	ND	6	ND	4	ND	2	26	ND	20	7	21	1951
BL 0004	Bleron	Allogny	0.05	0.48	6.51	15.48	0.41	0	1.56	1.01	33.93	13	9	4	123	5	57	74	54	222	11	ND	7	ND	4	360	60	136	15	65	14	3	13	2	13	3	7	1	7	1	6	ND	1	13	ND	32	8	29	2649
BL 00051	Bleron	Allogny	0.04	0.35	4.95	12.46	0.41	0.75	2.19	0.9	39.67	7	4	5	107	4	47	79	44	159	9	ND	6	ND	3	262	50	123	14	60	14	3	12	2	11	2	6	ND	5	ND	5	ND	2	9	ND	25	6	17	1935
BL 00052	Bleron	Allogny	0.04	0.44	4.52	12.77	0.39	0.69	1.95	0.95	39.97	8	4	5	94	3	44	71	38	142	9	ND	8	ND	3	234	44	107	12	51	11	2	10	2	9	2	5	ND	5	ND	4	ND	2	19	ND	21	5	17	1809
BL 0006	Bleron	Allogny	0.09	0.78	4.75	12.52	0.61	0.01	4.18	1	37.43	7	9	8	55	4	54	92	36	130	7	ND	6	ND	4	309	44	111	11	49	11	2	9	2	9	2	5	ND	5	ND	4	ND	2	8	ND	22	9	21	1845
BL 0007	Bleron	Allogny	0.1	0.21	6.94	15.38	0.84	0.02	4.39	1.27	30	7	3	10	144	7	183	161	89	268	16	ND	8	ND	11	834	92	194	22	96	21	5	20	3	18	4	10	1	8	1	7	1	2	34	ND	39	15	18	3216
BL 0008	Bleron	Allogny	0.04	0.61	4.06	13.49	0.44	0.04	1.61	1.03	40.07	9	7	11	59	7	33	62	34	139	8	ND	7	ND	2	336	39	85	10	43	9	2	8	1	8	2	4	ND	5	ND	4	ND	2	10	ND	20	4	21	1726
BL 0009	Bleron	Allogny	0.06	0.55	5.8	14.13	0.49	0.02	1.55	1.25	36.54	6	5	4	69	3	52	71	54	156	8	ND	6	1	5	444	55	131	15	66	15	3	14	2	14	3	7	1	7	1	4	ND	1	36	ND	27	8	23	2283
BL 0010	Bleron	Allogny	0.09	0.4	5.84	14.74	0.54	0.01	4.78	1	32.72	10	4	11	52	7	74	118	60	212	11	ND	33	1	6	471	76	152	18	79	18	4	16	2	14	3	7	1	7	ND	6	ND	2	122	ND	41	10	18	2154
BL 0012	Bleron	Allogny	0.02	0.39	1.05	10.01	0.37	0.45	1.26	0.37	50.37	5	2	5	12	3	22	102	10	62	2	ND	5	ND	ND	537	11	26	3	11	2	ND	2	ND	2	ND	1	ND	1	ND	2	ND	2	1	ND	5	1	5	658
BL-A-04-01	Bleron	Allogny	0.06	0.34	5.83	11.82	0.47	0.64	1.07	0.91	40.53	13	10	4	110	5	45	52	45	142	7	ND	4	ND	3	278	44	118	13	56	13	3	12	2	12	2	6	ND	6	ND	4	ND	2	10	ND	24	6	18	2001
BL-A-04-02	Bleron	Allogny	0.04	0.49	4.88	13.43	0.4	0.54	0.93	0.86	39.67	15	11	1	101	4	33	46	35	108	5	ND	3	ND	3	217	32	89	10	44	10	2	9	2	9	2	5	ND	5	ND	3	ND	ND	7	ND	17	4	20	1636
BL-A-06-01	Bleron	Allogny	0.03	0.15	1.56	9.56	0.59	0.63	2.1	0.26	49.44	7	2	2	7	1	18	72	14	79	3	ND	3	ND	ND	214	16	37	4	17	4	ND	3	ND	3	ND	2	ND	2	ND	2	ND	3	2	ND	7	2	5	720
BL-A-09-01	Bleron	Allogny	0.11	0.48	6.67	14.79	0.47	1.07	1.48	1.13	33.76	4	ND	ND	34	ND	53	70	55	171	8	ND	4	ND	5	444	53	139	16	71	17	4	15	3	14	3	7	1	7	1	5	ND	ND	ND	ND	30	7	22	2221
BL-A-09-02	Bleron	Allogny	0.1	0.28	5.2	12.05	0.86	1.89	1.93	0.89	38.47	8	2	4	144	5	97	116	84	260	14	ND	3	ND	8	764	89	223	26	116	27	6	24	4	21	4	10	1	10	1	7	1	2	17	ND	45	14	17	2304
BL-B-11-01	Bleron	Allogny	0.06	0.13	1.65	11.44	0.36	0.73	2.37	0.09	46.63	27	16	10	10	5	24	68	10	110	4	ND	4	ND	ND	184	13	27	3	12	2	ND	2	ND	2	ND	1	ND	1	ND	3	ND	1	8	ND	5	1	4	1150
BL-B-11-02	Bleron	Allogny	0.03	0.33	5.02	11.32	0.52	0.89	2.32	0.83	41.04	16	7	3	84	3	44	58	44	136	7	ND	4	ND	2	251	44	96	12	55	12	3	11	2	10	2	5	ND	5	ND	4	ND	1	2	ND	24	6	15	1606
BL-B-11-02 bis	Bleron	Allogny	0.02	0.32	4.86	10.55	0.5	0.96	2.19	0.84	42.48	16	7	6	87	3	45	56	43	137	7	ND	3	ND	2	234	42	90	11	49	11	2	10	2	9	2	5	ND	5	ND	4	ND	1	2	ND	22	6	15	1641
BL-B-12-01	Bleron	Allogny	0.12	0.42	5.66	12.83	0.44	1.14	1.79	1.01	37.91	19	16	ND	183	6	57	74	49	158	8	ND	3	ND	4	288	52	122	14	61	14	3	12	2	11	2	6	ND	6	ND	4	ND	2	13	ND	29	6	20	2050
BL-B-12-02	Bleron	Allogny	0.03	0.42	5.56	9.91	0.44	0.88	2.87	1.13	41.62	8	ND	2	77	ND	46	66	42	121	7	ND	3	ND	3	237	48	111	12	54	12	3	10	2	10	2	5	ND	5	ND	3	ND	2	ND	ND	26	6	17	1677
BL-B-12-03	Bleron	Allogny	0.04	0.36	5.68	13.35	0.53	1.48	2.03	0.94	36.65	18	13	32	164	7	68	88	53	173	10	ND	3	ND	5	347	60	144	16	70	16	4	14	2	13	2	6	ND	7	ND	5	ND	1	15	ND	32	8	20	1978
BL-B-14-01	Bleron	Allogny	0.11	0.33	4.48	11.8	0.47	1.04	1.19	1	41.8	7	4	ND	89	5	51	68	67	147	8	ND	3	ND	4	474	56	159	16	74	17	4	16	3	15	3	8	1	7	1	4	ND	2	8	ND	22	8	16	1828
BL-B-14-02	Bleron	Allogny	0.03	0.33	5.39	12.39	0.47	1.07	1.2	1.06	39.65	7	125	ND	101	2	49	71	75	149	8	ND	3	ND	3	528	63	185	19	84	19	4	18	3	16	3	8	1	8	1	4	ND	2	6	ND	22	9	17	2053
BL-B-14-03	Bleron	Allogny	0.05	0.25	4.86	11.99	0.64	1.52	1.69	0.89	40.08	6	2	2	79	7	70	97	74	188	10	ND	3	ND	5	623	71	191	20	88	19	4	18	3	16	3	8	1	7	ND	5	ND	2	13	ND	27	10	14	1820
BL-B-15-01	Bleron	Allogny	0.06	0.62	7.06	15.73	0.38	0.99	1.89	1.14	31.51	6	5	11	36	4	65	83	47	165	8	ND	8	2	6	341	50	114	14	59	13	3	12	2	12	2	6	ND	6	ND	4	ND	2	153	ND	29	8	25	2240
BL-B-15-02	Bleron	Allogny	0.03	0.48	4.45	12.69	0.42	0.99	0.99	1.12	40.64	4	1	2	33	ND	47	58	45	149	7	ND	3	ND	3	375	44	104	12	52	12	3	11	2	10	2	5	ND	5	ND	4	ND	2	3	ND	20	6	20	1703
BL-B-15-03	Bleron	Allogny	0.05	0.52	6.89	15.12	0.47	0.71	0.89	1.13	33.87	8	28	5	97	9	46	50	38	146	8	ND	3	ND	4	448	38	119	11	48	11	2	9	2	10	2	5	ND	5	ND	4	ND	1	9	ND	23	6	22	2088
BL-C-24-02	Bleron	Allogny	0.1	0.14	5.12	11.81	0.94	1.81	2.06	1.19	38.69	4	2	3	57	5	90	109	77	189	12	ND	3	ND	7	708	76	191	22	100	23	5	21	4	19	4	9	1	9	1	5	ND	2	7	ND	30	16	15	2079
BL-C-24-03	Bleron	Allogny	0.03	0.43	5.17	13.01	0.52	0.83	2.37	1	37.99	19	17	13	129	10	51	67	48	147	8	ND	3	ND	4	285	52	119	14	63	14	3	12	2	11	2	6	ND	5	ND	4	ND	1	5	ND	27	7	17	1827
BL-C-25-01	Bleron	Allogny	0.01	0.5	5.46	13.3	0.49	0.96	1.13	1.36	37.9	6	3	ND	48	2	49	61	49	134	7	ND	2	ND	4	431	44	124	14	62	14	3	12	2	12	2	6	ND	7	ND	4	ND	ND	ND	ND	23	6	23	2023
BL-C-25-02	Bleron	Allogny	0.03	0.46	6.2	13.46	0.54	1.05	1.37	1.33	36.28	5	2	ND	46	2	51	73	60	166	9	ND	3	ND	4	505	57	154	17	78	18	4	17	3	15	3	8	1	8	1	5	ND	1	3	ND	31	8	24	2332
BL-C-27-01	Bleron	Allogny	0.05	0.4	5.09	12.7	0.74	0.69	1.72	1.29	38.65	7	3	3	40	3	47	83	74	219	11	ND	4	ND	5	457	67	170	21	94	22	5	20	3	18	3	9	1	8	1	6	ND	2	4	ND	32	15	19	1956
BL-C-27-02	Bleron	Allogny	0.17	0.68	6.31	15.13	0.64	0.91	1.97	1.59	32.41	4	2	4	39	1	54	73	52	137	7	ND	5	ND	4	568	48	121	15	68	16	3	14	2	13	2	7	ND	6	ND	4	ND	7	12	ND	20	11	21	2108
BL-C-27-03	Bleron	Allogny	0.05	0.56	5.4	11.94	0.46	0.64	1.17	1.37	40.22	14	16	ND	72	5	39	53	39	109	5	ND	3	ND	3	344	35	89	11	49	11	3	11	2	10	2	5	ND	5	ND	3	ND	ND	2	ND	15	8	18	1651
BL-D-17-01	Bleron	Allogny	0.01	0.57	5.48	10.65	0.38	0.69	1.88	1.53	41.36	15	8	ND	121	ND	37	51	35	86	5	ND	2	ND	2	240	33	79	9	39	8	2	7	1	7	1	4	ND	4	ND	2	ND	ND	2	ND	12	5	15	1502
BL-D-17-02	Bleron	Allogny	0.06	0.42	4.6	11.49	0.46	1.11	1.99	1.25	41.03	19	14	2	115	5	55	69	43	116	7	ND	2	ND	3	343	45	107	12	52	11	2	10	2	9	2	4	ND	4	ND	3	ND	1	7	ND	17	7	14	1678
BL-D-17-03	Bleron	Allogny	0.02	0.63	4.95	12.85	0.42	1.12	2.8	1.63	37.26	16	10	1	111	2	56	77	48	124	7	ND	3	ND	3	359	49	114	13	56	12	3	11	2	10	2	5	ND	5	ND	3	ND	ND	9	ND	19	7	17	1569
BU 0801	Bubelle	Allogny	ND	0.24	6.27	12.83	0.25	0.72	0.8	0.59	39.36	3	ND	10	54	2	49	193	126	175	9	ND	4	ND	5	680	79	214	26	128	31	7	32	5	30	6	15	2	15	2	5	ND	3	ND	ND	25	4	26	2224
BU 0801 bis	Bubelle	Allogny	ND	0.28	5.88	14.32	0.26	0.69	0.82	0.58	37.59	3	ND	17	55	2	47	198	137	197	10	ND	4	ND	4	706	92	254	29	139	33	7	33	5	32	6	16	2	15	2	5	ND	3	ND	ND	30	5	28	2276
BU 0802	Bubelle	Allogny	0.03	0.26	6.96	14.11	0.27	0.72	0.78	0.55	36.55	5	ND	12	41	ND	39	144	60	194	11	ND	4	ND	3	424	58	152	18	86	21	5	19	3	17	3	8	1	9	1	5	ND	2	ND	ND	37	8	28	2280
BU 0803	Bubelle	Allogny	0.03	0.34	8.32	18.12	0.2	0.95	1.25	0.67	27.81	2	ND	54	63	2	56	181	127	285	14	ND	5	ND	5	512	70	159	21	110	29	7	32	5	31	6	16	2	16	2	8	1	1	34	ND	46	8	37	3043
BU 0803 bis	Bubelle	Allogny	0.01	0.33	8.11	18.61	0.21	1.05	1.31	0.63	27.2	3	ND	37	57	1	63	195	136	304	16	ND	4	ND	6	560	84	193	24	119	31	7	32	6	32	6	17	2	16	2	9	1	1	19	ND	53	9	39	3354
BU 0804	Bubelle	Allogny	0.05	0.45	9.24	21.24	0.09	1.2	1.65	0.54	21.42	1	ND	10	21	3	80	289	216	263	14	ND	3	ND	8	453	85	238	33	169	44	10	48	8	49	10	26	4	24	3	8	1	ND	ND	ND	44	5	37	3307
BU 0805	Bubelle	Allogny	0.05	0.34	5.17	12.8	0.25	0.66	0.8	0.5	40.89	12	3	9	140	3	42	246	129	150	8	ND	4	ND	4	445	81	211	27	130	30	6	31	5	30	6	16	2	15	2	4	ND	2	ND	ND	24	4	30	1818
BU 0806	Bubelle	Allogny	0.03	0.29	6.33	13.07	0.32	0.87	1.13	0.54	38.3	6	2	91	62	3	56	272	186	210	11	ND	4	ND	5	486	73	184	27	140	36	8	41	7	41	8	22	3	19	3	6	ND	2	ND	ND	35	7	29	2384
BU 0807	Bubelle	Allogny	0.04	0.21	6.55	14.86	0.24	0.71	1.08	0.49	35.75	5	ND	29	50	1	41	153	103	229	11	ND	4	ND	3	392	58	137	18	92	24	5	26	4	24	5	13	2	12	2	6	ND	2	ND	ND	34	7	28	2603
BU 0808	Bubelle	Allogny	0.01	0.23	5.19	10.76	0.26	0.13	0.41	0.33	45.15	10	3	34	174	2	11	60	83	91	5	ND	3	ND	1	59	23	74	9	49	14	3	16	3	19	4	11	2	11	2	3	ND	2	ND	ND	14	3	19	1560
BU 08091	Bubelle	Allogny	0.16	0.15	4.85	33.4	0.15	1.36	0.38	0.14	10.77	5	6	16	62	5	80	91	48	173	13	ND	8	ND	5	438	27	77	9	43	11	3	11	2	11	2	6	ND	6	ND	5	ND	3	83	ND	14	3	14	3435
BU 08092	Bubelle	Allogny	0.07	0.29	7.31	18.09	0.23	0.94	0.86	0.35	29.95	7	2	6	67	2	60	216	145	220	12	ND	4	ND	6	350	63	167	23	121	32	8	35	6	34	7	18	2	16	2	7	ND	2	ND	ND	34	4	22	2693
BU 08093	Bubelle	Allogny	0.03	0.3	6.15	15.45	0.27	0.7	0.88	0.39	35.57	8	1	23	58	2	45	196	143	194	10	ND	3	ND	4	306	57	142	20	106	28	7	32	6	33	6	17	2	16	2	6	ND	2	ND	ND	30	4	23	2362
BU 1001	Bubelle	Allogny	0.02	0.18	4.72	32.87	0.1	0.57	0.66	0.12	12.25	22	30	315	408	5	32	103	66	490	12	ND	5	ND	3	229	60	158	17	75	16	3	15	3	15	3	8	1	8	1	14	1	4	66	ND	21	4	20	3550
BU 1002	Bubelle	Allogny	0.04	0.34	5.83	13.06	0.33	0.76	1.31	0.48	38.86	23	4	15	161	4	42	576	168	188	11	ND	4	ND	4	552	139	325	41	183	41	9	42	7	41	8	21	3	19	3	6	ND	3	ND	ND	37	5	33	2136
BU 1003	Bubelle	Allogny	0.04	0.29	8.87	12.97	0.25	0.63	0.83	0.54	35.53	11	16	14	64	2	40	243	96	192	11	ND	3	ND	3	647	84	205	26	121	27	6	26	4	24	5	12	2	12	2	6	ND	2	ND	ND	33	6	23	2511
BU 1004	Bubelle	Allogny	0.04	0.29	7.51	12.19	0.24	0.71	0.99	0.49	38.42	43	15	124	173	24	39	281	130	172	10	ND	4	ND	4	769	100	275	32	149	34	7	34	5	31	6	16	2	15	2	5	ND	3	ND	ND	29	4	29	2225
BU 1004 bis	Bubelle	Allogny	0.02	0.3	5.54	13.68	0.25	0.66	0.97	0.5	38.9	46	15	83	164	18	37	297	143	185	10	ND	4	ND	3	786	114	307	34	159	36	8	35	6	33	6	17	2	15	2	5	ND	3	ND	ND	31	4	31	2166
BU 1005	Bubelle	Allogny	0.03	0.26	6.07	12.66	0.35	0.79	0.95	0.44	39.57	20	3	28	171	5	51	390	156	197	11	ND	4	ND	5	524	102	265	32	151	35	8	37	6	38	7	20	3	18	3	6	ND	4	ND	ND	32	4	27	2306
BU 1005 bis	Bubelle	Allogny	0.05	0.44	5.76	14.93	0.39	0	0.94	0.57	36.8	32	8	35	232	3	52	383	143	178	10	ND	12	ND	5	490	91	259	29	134	30	7	32	5	32	6	17	2	17	2	5	ND	2	22	ND	27	4	33	2269
BU 1006	Bubelle	Allogny	0.04	0.31	6.01	14.81	0.28	0.72	0.56	0.39	37.1	2	1	15	31	6	40	79	39	163	10	ND	3	ND	3	271	49	124	14	63	15	3	12	2	11	2	5	ND	6	ND	5	ND	2	3	ND	31	8	28	2085
BU 1007	Bubelle	Allogny	0.03	0.3	6.73	13.89	0.36	0.01	1.14	0.51	37.11	18	3	38	308	10	48	484	166	222	13	ND	5	ND	5	474	162	420	47	211	47	10	43	7	40	8	20	3	18	2	6	ND	2	13	ND	38	7	39	2662
BU 1008	Bubelle	Allogny	0.03	0.19	4.8	35.07	0.12	0.01	0.58	0.23	9.37	3	3	13	30	ND	46	188	66	364	11	ND	5	ND	4	296	58	158	17	77	17	4	15	3	15	3	8	1	8	1	11	ND	2	6	ND	20	4	22	3218
BU 10091	Bubelle	Allogny	0.03	0.15	6.74	13.54	0.42	0	1.06	0.47	37.78	13	2	36	77	5	104	168	76	325	15	ND	6	ND	15	321	88	210	24	113	26	6	23	4	21	4	10	2	11	1	9	1	2	13	ND	56	14	36	3508
BU 10092	Bubelle	Allogny	0.04	0.33	7.86	14.01	0.28	0.03	0.75	0.55	35.85	10	4	10	92	8	41	114	44	189	10	ND	6	ND	4	314	53	131	15	68	16	3	14	2	13	2	6	ND	7	ND	5	ND	1	14	ND	32	9	35	2647
BU 10093	Bubelle	Allogny	0.15	0.23	7.2	13.69	0.77	0.04	1.72	0.46	35.36	16	5	59	110	2	122	437	132	610	36	ND	10	ND	10	1140	205	513	55	239	55	12	46	8	42	8	19	3	17	2	16	2	6	61	ND	141	36	33	3091
MA 0001	La Main Ferme	Allogny	0.02	0.34	8.12	19.11	0.17	0.83	1.31	0.3	27.02	1	ND	3	34	2	56	185	55	339	14	ND	7	ND	5	333	143	283	33	137	27	5	19	3	16	3	8	1	8	1	10	1	ND	4	ND	49	12	56	3294
MA 00021	La Main Ferme	Allogny	0.06	0.38	9.53	20.94	0.14	1.17	2.24	0.8	20.62	2	5	1	17	6	67	157	78	354	17	ND	6	ND	6	518	100	226	26	120	28	6	24	4	23	5	12	2	12	2	10	1	ND	1	ND	60	13	48	3787
MA 00022	La Main Ferme	Allogny	0.06	0.4	9.43	21.32	0.12	1.29	2.42	0.85	19.87	1	ND	4	13	5	70	163	77	361	17	ND	6	ND	7	533	100	230	27	119	28	6	24	4	24	4	12	2	13	2	11	1	ND	3	ND	61	13	48	3756
MA 0003	La Main Ferme	Allogny	0.06	0.26	5.33	15.74	0.26	0.76	0.77	0.36	36.42	5	ND	18	32	2	48	91	46	235	11	ND	10	ND	4	246	54	133	15	70	17	4	14	2	13	2	7	ND	7	1	7	ND	2	20	ND	38	8	32	2354
MA 0004	La Main Ferme	Allogny	0.03	0.24	6.59	14.72	0.27	0.79	1.13	0.54	35.63	4	ND	6	49	3	46	124	55	261	14	ND	5	ND	4	412	78	180	21	93	22	5	18	3	16	3	8	1	8	1	7	ND	2	3	ND	39	13	30	2901
MA 0005	La Main Ferme	Allogny	0.04	0.31	6.62	15.03	0.28	0.82	0.68	0.52	35.46	7	ND	4	36	4	49	187	53	263	14	ND	5	ND	4	387	78	188	23	104	25	5	20	3	17	3	8	1	8	1	7	ND	2	2	ND	42	10	30	3038
MA 0006	La Main Ferme	Allogny	0.01	0.29	3.16	10.74	0.28	0.05	0.47	0.37	47.71	11	7	4	75	25	5	16	27	176	9	ND	284	ND	ND	34	20	55	6	27	7	1	6	1	7	1	4	ND	5	ND	5	ND	3	11	ND	25	4	25	1701
MA 0007	La Main Ferme	Allogny	0.01	0.26	6.8	14.14	0.29	0.57	0.94	0.28	36.68	2	ND	6	51	6	35	249	56	350	15	ND	6	ND	3	308	152	332	37	145	27	5	19	3	15	3	8	1	7	1	10	1	3	9	ND	46	15	37	3339
MA 0008	La Main Ferme	Allogny	0.07	0.34	6.85	14.7	0.3	0.83	1.46	0.6	34.73	4	ND	ND	40	1	46	103	62	257	12	ND	5	ND	4	382	66	169	18	81	20	5	18	3	18	3	9	1	9	1	7	ND	2	2	ND	44	9	33	2694
MA 0009	La Main Ferme	Allogny	0.04	0.32	4.64	12.17	0.42	0.69	0.93	0.52	42.11	8	12	8	63	12	26	87	39	177	9	ND	4	ND	2	435	50	110	13	56	14	3	11	2	10	2	5	ND	6	ND	5	ND	3	4	ND	26	7	29	2004
MA 0010	La Main Ferme	Allogny	0.02	0.19	5.57	15.93	0.29	0.61	0.69	0.51	35.9	4	ND	6	23	ND	35	76	46	262	10	ND	4	ND	3	289	58	161	16	69	16	3	13	2	12	2	6	ND	6	ND	7	ND	2	ND	ND	25	7	30	2473
MA 0011	La Main Ferme	Allogny	0.09	0.24	5.99	14.9	0.33	0.73	0.83	0.58	36.31	5	2	62	35	8	42	125	46	246	13	ND	7	2	3	499	57	156	16	70	17	4	13	2	13	2	6	1	6	ND	6	ND	4	381	ND	35	8	28	2841
MA 0012	La Main Ferme	Allogny	0.03	0.29	4.81	14.59	0.23	0.62	0.63	0.44	39.02	2	ND	4	14	1	36	89	39	213	10	ND	4	ND	3	232	47	119	13	55	13	3	11	2	10	2	5	ND	5	ND	6	ND	2	ND	ND	24	6	26	2245
MA 0013	La Main Ferme	Allogny	0.02	0.26	4.67	10.34	0.21	0.56	1.02	0.25	45.58	6	2	12	5	4	29	75	25	149	6	ND	5	ND	2	185	37	117	23	42	9	2	7	1	6	1	3	ND	3	ND	4	ND	2	ND	ND	17	6	20	1616
MA 00141	La Main Ferme	Allogny	0.03	0.03	0.85	4.29	0.43	0.02	0.24	0.03	61.2	117	34	129	1	529	ND	8	4	32	1	4	6	4	ND	36	7	23	2	8	2	ND	1	ND	1	ND	ND	ND	ND	ND	ND	ND	3	ND	ND	5	1	3	225
MA 00142	La Main Ferme	Allogny	0.06	0.2	3.41	11.29	0.59	0.82	2.39	0.18	43.88	2	4	8	5	ND	42	111	25	171	7	ND	5	ND	2	199	43	108	11	44	9	2	7	1	6	1	3	ND	3	ND	4	ND	5	ND	ND	18	5	12	1174
MA 00143	La Main Ferme	Allogny	0.01	0.1	0.95	3.17	0.38	0.03	0.55	0.06	62.42	108	50	89	2	140	3	20	5	54	2	3	5	2	ND	127	9	29	3	11	2	ND	1	ND	1	ND	ND	ND	ND	ND	1	ND	3	20	ND	6	1	7	445
MA 00144	La Main Ferme	Allogny	0.02	0.06	4.53	12.46	0.47	0.65	1.08	0.1	42.45	5	1	23	6	13	110	65	24	295	8	1	5	ND	2	161	41	95	9	37	8	2	6	ND	6	1	3	ND	3	ND	7	ND	6	ND	ND	17	5	10	1604
MA 00151	La Main Ferme	Allogny	0	0.25	6.57	16.57	0.24	0.79	0.98	0.27	33.28	ND	ND	4	13	1	49	257	44	302	14	ND	5	ND	4	277	155	339	35	132	23	4	16	2	11	2	6	ND	6	ND	8	ND	2	8	ND	32	10	49	3070
MA 00152	La Main Ferme	Allogny	0.03	0.31	7.52	18.5	0.2	0.85	1.24	0.32	28.66	1	ND	7	17	3	57	295	51	389	16	ND	6	ND	5	323	182	364	39	152	27	5	19	3	14	3	7	ND	7	1	11	1	1	9	ND	41	11	59	3564
MA 00153	La Main Ferme	Allogny	0.03	0.22	5.56	18.36	0.2	0.7	1.1	0.32	32.01	5	15	17	22	49	45	222	39	280	11	ND	5	ND	4	266	134	288	29	112	19	4	14	2	10	2	5	ND	5	ND	7	ND	2	7	ND	28	9	40	2635
MA 00161	La Main Ferme	Allogny	0.07	0.5	4.09	9.29	0.91	0.67	3	0.73	43.96	57	43	32	8	133	34	170	36	163	7	ND	8	1	3	202	50	128	12	53	12	3	10	2	10	2	5	ND	5	ND	4	ND	8	ND	ND	22	5	21	1741
MA 00162	La Main Ferme	Allogny	0.05	0.36	8.35	18.97	0.28	1.27	2.92	0.64	24.4	10	17	8	21	27	66	125	75	311	15	ND	7	ND	5	463	99	263	25	113	26	6	22	4	21	4	11	2	11	2	9	1	ND	9	ND	47	11	41	3422
MT 34011	La Motte du fief	Allogny	0.12	0.26	2.66	11.5	0.46	0.96	2.33	0.33	44.35	11	5	9	7	2	35	123	26	221	8	ND	6	ND	ND	632	28	58	7	28	6	1	5	ND	5	1	3	ND	3	ND	6	ND	4	ND	ND	12	3	6	1682
MT 34012	La Motte du fief	Allogny	0.04	0.37	1.72	12.03	0.37	0.62	1.62	0.36	45.93	21	15	9	8	7	23	62	21	157	6	ND	5	ND	ND	366	18	44	4	20	4	ND	4	ND	4	ND	2	ND	3	ND	4	ND	3	ND	2	8	2	7	1237
MT 34013	La Motte du fief	Allogny	0.05	0.33	2.17	11.31	0.37	0.65	1.77	0.34	46.26	17	10	7	6	4	30	66	21	187	6	ND	6	ND	ND	400	19	40	4	20	4	ND	4	ND	4	ND	2	ND	2	ND	5	ND	3	ND	ND	8	2	7	1510
MT 3402	La Motte du fief	Allogny	0.07	0.57	7.68	17.65	0.34	1.08	1.44	0.81	28.52	3	1	ND	28	2	78	94	68	245	13	ND	5	ND	6	343	69	168	19	84	18	4	17	3	16	3	8	1	9	1	7	ND	1	ND	ND	43	7	29	2845
MT 34031	La Motte du fief	Allogny	0.04	0.66	6.72	17.87	0.32	0.84	1.68	0.59	29.54	6	3	4	30	2	58	67	54	258	14	ND	5	ND	5	397	59	156	17	72	16	3	14	3	13	3	6	ND	7	ND	8	ND	2	ND	ND	31	6	23	3152
MT 34032 bis	La Motte du fief	Allogny	0.06	0.86	6.73	20.72	0.36	0.88	1.92	0.65	24.62	5	ND	3	29	3	66	74	51	251	14	ND	3	ND	4	391	60	162	17	72	15	3	13	2	12	2	6	ND	6	ND	7	ND	1	ND	ND	30	6	22	3423
MT 34033 a	La Motte du fief	Allogny	0.08	0.78	7.41	19.64	0.3	0.89	1.82	0.62	25.62	6	1	8	23	1	60	71	55	270	15	ND	5	ND	5	366	63	168	18	76	17	4	15	2	14	3	7	1	6	ND	7	ND	1	ND	ND	33	6	25	3462
MT 34033 b	La Motte du fief	Allogny	0.08	0.82	7.55	20.09	0.31	0.83	1.93	0.62	24.63	5	ND	1	21	1	60	74	60	284	15	ND	4	ND	5	378	66	168	19	82	17	4	15	3	14	3	7	ND	7	ND	8	ND	2	ND	ND	34	6	27	3601
MT 34033 c	La Motte du fief	Allogny	0.04	0.75	7.25	18.06	0.34	0.77	1.89	0.59	28.26	5	2	3	29	2	58	71	57	275	14	ND	5	ND	5	427	62	158	17	77	16	4	14	2	13	3	7	ND	7	ND	7	ND	2	ND	ND	32	6	25	3384
MT 3404	La Motte du fief	Allogny	0.01	0.33	5.88	16.24	0.32	0.55	0.59	0.36	35.11	7	1	6	80	3	39	143	52	242	13	ND	7	ND	3	357	92	218	26	110	23	4	17	3	14	3	7	1	7	1	6	ND	3	ND	ND	42	10	32	2631
MT 3405	La Motte du fief	Allogny	0.09	0.42	6.02	13.73	0.48	1.15	2.26	1.07	35.51	10	6	4	39	4	74	91	70	214	11	ND	5	ND	6	454	66	158	18	78	18	4	16	3	15	3	8	1	8	1	6	ND	2	16	ND	31	9	22	2374
MT 3406	La Motte du fief	Allogny	0.05	0.41	6.02	15.09	0.56	0.94	3.3	0.94	32.57	13	9	7	93	7	61	241	74	297	17	ND	5	ND	7	466	124	266	29	124	26	6	21	3	18	3	9	1	8	1	8	1	3	9	ND	47	8	25	2562
MT 3407	La Motte du fief	Allogny	0.05	0.44	6.39	16.96	0.34	0.95	1.08	0.73	32	2	1	4	102	1	60	62	66	226	12	ND	6	ND	5	295	58	139	16	70	16	3	14	2	14	3	7	1	7	1	6	ND	2	13	ND	30	5	22	2692
MT 3408	La Motte du fief	Allogny	0.06	0.65	7.56	15.62	0.44	1.54	4.27	1.35	27.77	6	4	3	50	2	82	158	77	233	13	ND	5	ND	6	837	78	179	21	90	20	4	18	3	16	3	9	1	8	1	6	ND	2	ND	ND	37	11	24	3064
MT 3409	La Motte du fief	Allogny	0.05	0.84	6.06	14.81	0.36	0.95	4.7	1.45	30.98	13	9	2	42	5	55	113	61	218	11	ND	7	ND	3	396	64	138	16	72	16	3	14	2	13	3	7	1	7	ND	6	ND	1	ND	ND	31	6	28	2528
MT 3410	La Motte du fief	Allogny	0.02	0.37	8.64	17.97	0.25	0.77	1.09	0.59	27.82	2	ND	6	57	ND	41	245	116	311	15	ND	7	ND	4	775	114	317	35	162	37	8	32	5	28	5	14	2	13	2	8	ND	2	ND	ND	51	12	39	3432
MT 3411	La Motte du fief	Allogny	0.05	0.39	6.9	12.29	0.56	1.05	2.14	1.07	36.53	12	8	4	114	7	59	94	78	217	12	ND	6	ND	5	620	73	169	19	87	20	4	18	3	17	3	9	1	8	1	6	ND	2	4	ND	36	8	22	2797
LA 3101	Le Latier	Allogny	0.12	0.55	8.52	16.61	0.35	1.36	1.28	0.44	29.07	13	10	65	150	11	76	89	48	155	11	ND	8	3	7	315	45	116	13	61	14	3	12	2	12	2	6	ND	7	1	5	ND	2	499	ND	31	8	25	2340
LA 3102	Le Latier	Allogny	0.14	0.37	5.31	13.57	0.25	1.37	1.74	0.89	37.59	5	5	51	17	3	64	121	92	186	9	ND	6	8	5	344	62	134	18	86	19	4	19	3	18	4	10	2	10	2	6	ND	2	247	ND	30	10	22	1680
LA 3103	Le Latier	Allogny	0.04	0.39	6.34	14.55	0.27	1.19	1.39	0.43	35.68	3	ND	51	52	1	70	117	62	212	11	ND	4	ND	5	272	61	138	18	82	18	4	16	3	16	3	8	1	9	1	6	ND	2	ND	ND	36	7	28	2209
LA 3104	Le Latier	Allogny	0.06	0.17	6.49	14.29	0.54	1.47	2.2	0.52	34.51	2	ND	20	49	2	121	186	109	281	14	ND	5	ND	8	506	88	207	25	119	28	6	27	4	25	5	13	2	12	2	8	1	4	ND	ND	50	12	20	2383
LA 3105	Le Latier	Allogny	0.08	0.18	9.17	13.38	0.44	1.76	1.67	0.54	32.49	5	ND	110	53	2	78	117	61	217	11	ND	20	ND	5	401	64	165	17	80	18	4	16	3	15	3	8	1	8	1	6	ND	3	293	ND	36	9	19	3327
LA 3106	Le Latier	Allogny	0.04	0.32	5.12	12.88	0.46	0.9	1.21	0.51	39.93	4	ND	19	53	1	57	118	64	214	12	ND	4	ND	4	325	65	164	19	87	20	4	18	3	17	3	9	1	9	1	6	ND	3	ND	ND	41	10	27	2087
LA 3107	Le Latier	Allogny	0.03	0.49	2.83	14.47	0.33	0.62	0.69	0.46	41.51	10	5	88	145	4	33	55	62	158	7	ND	8	ND	2	159	48	118	14	67	16	3	14	2	14	3	8	1	8	1	5	ND	2	4	ND	20	5	32	1311
LA 3108	Le Latier	Allogny	0.07	0.39	7.86	12.09	0.34	0.98	1	0.52	37.59	2	1	ND	51	2	55	131	63	175	9	ND	5	ND	4	303	64	159	19	87	20	4	17	3	17	3	9	1	9	1	5	ND	2	ND	ND	37	13	35	2254
LA 3109	Le Latier	Allogny	0.03	0.46	4.52	12.81	0.22	0.26	0.59	0.49	42.33	7	4	40	108	2	19	54	31	92	5	ND	4	ND	ND	123	31	75	9	38	9	2	8	1	8	1	4	ND	5	ND	3	ND	1	ND	ND	16	4	27	1284
LA 3110	Le Latier	Allogny	0.02	0.41	6.44	14.12	0.34	0.97	1.62	0.63	35.83	1	ND	53	52	1	48	106	49	180	9	ND	4	ND	3	328	53	123	15	65	15	3	13	2	12	2	7	ND	7	ND	5	ND	2	3	ND	30	9	27	2180
LA 3111	Le Latier	Allogny	0.02	0.49	8.65	14.66	0.31	0.89	0.93	0.41	32.89	7	4	85	162	2	49	77	59	190	11	ND	4	ND	5	428	55	137	16	71	16	3	15	2	14	3	7	1	7	1	5	ND	2	ND	ND	35	8	30	2630
PA 0001	Le Parc	Allogny	0.07	0.28	7.67	16.5	0.35	0.02	2.41	0.38	30.84	ND	ND	23	42	4	149	191	48	236	14	ND	8	ND	9	467	80	185	20	87	19	4	15	3	14	3	7	1	8	1	7	1	3	7	ND	49	15	34	3314
PA 0002	Le Parc	Allogny	0.06	0.53	6.29	14.96	0.26	0.02	1.33	0.81	35.54	12	2	6	44	2	105	119	59	164	8	ND	7	ND	5	585	48	131	15	73	20	4	19	3	19	4	10	1	11	2	5	ND	1	ND	ND	32	15	32	2317
PA 0003	Le Parc	Allogny	0.03	0.32	6.21	17.06	0.28	ND	1.28	0.31	33.11	2	ND	7	56	2	46	531	43	315	12	ND	6	ND	4	304	224	486	51	192	32	6	22	3	15	3	6	ND	6	ND	9	ND	1	1	ND	38	10	59	3094
PA 0004	Le Parc	Allogny	0.05	0.62	9.39	16.21	0.32	0.01	6.1	0.57	24.65	2	ND	7	10	4	114	218	52	195	10	ND	6	ND	4	304	71	169	19	88	21	4	16	3	15	3	8	1	8	1	6	ND	1	3	ND	40	10	40	3323
PA0101	Le Parc	Allogny	0.08	0.57	7.5	24.97	0.3	1.67	6.83	0.6	11.93	2	ND	ND	19	1	73	295	76	499	16	ND	5	ND	5	792	120	339	33	149	32	6	24	4	21	4	11	2	11	1	16	1	ND	ND	ND	47	20	41	3906
PA0102	Le Parc	Allogny	ND	0.49	7.01	27.63	0.17	0.97	1.78	0.38	14.43	9	8	5	20	22	45	1588	58	880	17	ND	5	ND	3	503	544	915	76	248	34	5	19	3	15	3	9	1	9	1	29	1	ND	34	ND	60	10	44	4544
PA0104	Le Parc	Allogny	ND	0.33	7.31	18.61	0.44	1.02	1.78	0.53	27.47	16	17	6	65	5	65	556	68	349	16	ND	5	ND	5	567	166	405	45	182	35	7	26	4	21	4	10	2	10	1	11	1	4	10	ND	48	21	37	3517
PA0105	Le Parc	Allogny	0.11	0.34	5.61	22.45	0.38	0.46	0.89	0.27	25.35	32	14	2	96	4	24	1287	52	750	14	ND	6	2	1	332	454	809	70	230	33	5	18	2	14	3	7	1	8	1	23	1	6	27	ND	49	9	40	3878
PA0106	Le Parc	Allogny	0.23	0.27	2.5	10.24	0.74	0.54	2.47	0.28	45.98	7	ND	9	6	4	14	191	24	133	6	ND	5	3	ND	313	51	145	13	54	10	2	8	1	7	1	3	ND	4	ND	4	ND	11	6	ND	16	7	14	1282
PA0107	Le Parc	Allogny	ND	0.88	10.51	25.93	0.06	2.03	7.79	1.16	4.67	1	ND	ND	2	1	90	691	86	419	20	ND	3	ND	6	1241	204	511	53	215	41	8	31	5	26	5	12	2	13	2	13	1	1	6	ND	61	26	67	4651
PA0201	Le Parc	Allogny	ND	0.47	6.44	17.3	0.57	1.49	1.84	0.86	29.51	21	ND	ND	57	3	92	226	89	258	12	ND	6	ND	3	770	117	297	30	130	28	6	25	4	25	5	12	2	12	2	8	ND	3	5	ND	37	13	36	3041
PA0202	Le Parc	Allogny	0.2	0.42	8.63	16.29	0.35	1.3	0.83	1.6	28.67	11	ND	ND	33	3	109	145	84	262	14	ND	5	ND	6	1122	86	250	26	118	28	6	24	4	24	5	12	2	13	2	8	1	3	ND	ND	55	14	53	3424
PA0203	Le Parc	Allogny	ND	0.57	9.52	18.2	0.28	1.74	1.56	0.98	24.13	4	ND	2	19	4	133	194	83	286	16	ND	4	2	5	870	107	361	29	130	31	6	26	4	25	4	12	2	12	2	8	1	2	2	ND	55	23	66	3750
PA0204	Le Parc	Allogny	0.05	0.46	7.64	18.12	0.3	1.31	1.56	0.8	27.5	10	ND	8	45	11	84	251	330	307	14	ND	4	2	5	599	82	206	24	107	26	7	37	8	53	12	34	5	32	5	7	1	3	18	ND	48	15	54	3261
PA0205	Le Parc	Allogny	0.01	0.48	7.77	17.49	0.47	1.28	1.28	1.03	27.85	12	ND	4	26	5	94	189	90	279	15	ND	4	ND	6	738	96	232	28	125	28	6	25	5	26	5	13	2	14	2	8	1	3	6	ND	44	20	43	3252
PA0206	Le Parc	Allogny	0.06	0.43	8.66	17.59	0.44	1.54	1.92	0.69	26.24	3	ND	7	53	3	88	175	101	340	18	ND	6	ND	5	407	106	253	28	124	30	7	28	5	29	6	15	3	15	2	9	1	3	10	ND	65	17	52	3969
PA0207	Le Parc	Allogny	0.01	0.51	7.52	18.22	0.58	1.57	2.29	0.85	26.06	12	1	5	50	8	98	249	112	304	15	ND	8	ND	4	830	145	350	38	161	35	7	32	6	31	6	15	2	15	2	9	1	3	10	ND	46	17	37	3262
US 1201	Les Usages	Allogny	0.08	0.5	6.63	16.89	0.36	0.02	3.56	0.62	29.86	5	ND	24	25	ND	90	233	109	336	13	ND	9	6	5	633	105	200	29	145	35	8	35	6	34	6	17	2	16	2	10	1	2	155	2	42	16	47	3185
US 1202	Les Usages	Allogny	0.05	0.7	7.26	18.5	0.28	0.03	2.61	0.76	27.41	3	ND	64	20	2	77	148	49	182	8	ND	5	ND	4	686	66	205	19	90	21	4	18	3	16	3	8	2	9	1	6	ND	2	31	ND	34	10	38	2721
US 1203	Les Usages	Allogny	0.1	0.53	7.01	17.17	0.39	0.02	4.36	0.39	28.5	2	ND	16	25	2	76	240	57	223	10	1	6	ND	3	462	66	145	19	90	20	4	18	3	16	3	8	1	9	1	6	ND	2	33	ND	30	12	26	2367
US 1204	Les Usages	Allogny	0.08	0.5	7.84	18.48	0.23	0.04	2.75	0.69	26.93	3	ND	5	24	2	91	158	60	225	12	ND	6	ND	5	742	90	270	26	119	27	6	23	4	19	4	9	1	10	1	6	ND	2	ND	ND	44	13	40	3013
US 1205	Les Usages	Allogny	0.07	0.6	6.24	16.43	0.42	ND	1.66	0.61	32.84	1	ND	56	35	ND	52	452	60	213	9	ND	6	1	3	429	143	368	38	171	35	7	25	4	20	3	9	1	9	1	6	ND	2	13	ND	30	12	56	2639
US 12061	Les Usages	Allogny	0.07	0.54	7.05	15.92	0.33	0.02	2.7	0.73	31.64	2	ND	5	13	3	108	252	100	233	12	ND	5	ND	4	642	71	158	19	89	21	5	23	4	22	5	13	2	12	2	6	ND	1	ND	ND	37	11	34	2997
US 12062	Les Usages	Allogny	0.07	0.64	5.52	15.96	0.31	0.01	2.33	0.8	33.89	3	2	8	15	3	72	226	92	210	10	ND	6	ND	3	533	59	128	16	76	18	4	20	3	20	4	11	2	12	2	5	ND	1	7	ND	31	9	40	2367
US 12063	Les Usages	Allogny	0.01	0.87	4.95	15.69	0.62	ND	1.11	0.87	35.32	3	2	74	44	15	41	80	42	198	10	ND	6	ND	2	429	22	57	7	31	8	2	8	2	10	2	7	1	9	1	6	ND	ND	15	ND	32	5	45	2546
US 12064	Les Usages	Allogny	0.06	0.52	7.32	16.55	0.36	ND	2.77	0.7	30.25	2	2	14	19	4	82	259	109	259	12	ND	10	ND	4	765	85	178	22	101	24	6	26	5	27	6	15	2	14	2	7	ND	2	7	ND	47	13	39	2972
US 1207	Les Usages	Allogny	0.07	0.45	8.09	14.05	0.3	ND	1.02	0.56	35.1	2	ND	16	25	ND	77	182	73	235	13	ND	6	ND	6	429	80	180	23	111	26	5	23	4	21	4	10	1	10	1	6	ND	2	2	ND	37	13	32	2444
US 1208	Les Usages	Allogny	0.09	0.18	7.46	12.74	0.65	0	2.35	0.51	36.24	3	ND	31	35	3	152	233	150	414	22	ND	7	ND	9	729	121	255	33	162	41	10	43	7	42	8	20	3	18	2	10	1	5	2	ND	63	25	29	3227
US 1209	Les Usages	Allogny	0.04	0.44	7.03	14.85	0.36	0.01	1.22	0.51	35.08	1	ND	7	27	ND	67	151	71	234	12	ND	6	ND	5	333	72	158	20	95	22	5	21	3	20	4	10	1	10	2	6	ND	2	1	ND	33	14	35	2506
US 1210	Les Usages	Allogny	0.02	0.31	5.06	14.38	0.35	0.02	0.63	0.84	38.91	7	3	41	91	20	31	70	26	184	11	ND	7	ND	2	235	17	42	5	24	6	1	6	1	6	1	4	ND	5	ND	5	ND	ND	23	ND	25	4	26	2640
US 1211	Les Usages	Allogny	0.03	0.41	6.37	13.54	0.41	0	1.61	0.84	37.21	16	2	15	52	4	90	127	90	254	12	ND	5	ND	5	658	67	152	18	88	22	5	23	4	24	5	13	2	13	2	6	ND	2	3	ND	37	13	34	2374
US 1212	Les Usages	Allogny	0.06	0.33	6.33	14.33	0.33	0	1.37	0.5	36.84	5	ND	16	27	ND	53	395	66	234	11	ND	8	ND	4	399	107	286	32	155	33	7	27	4	21	4	10	1	10	1	6	ND	2	2	ND	31	10	39	2358
US 1213	Les Usages	Allogny	0.06	0.32	5.67	14.93	0.45	0.02	0.99	0.69	36.61	6	8	60	123	53	90	199	41	273	21	ND	8	ND	3	353	41	110	12	57	12	3	11	2	11	2	6	1	7	1	7	2	2	46	ND	38	7	26	4412
BE3501	Beaume	Nozières	0.1	0.6	11.95	21.66	0.03	1.37	16.2	0.11	2.8	ND	ND	4	9	1	61	292	105	289	15	ND	3	ND	11	305	75	139	18	79	19	5	19	3	19	4	11	2	12	2	9	1	ND	6	ND	22	11	56	6690
BE35021	Beaume	Nozières	0.05	0.5	10.75	23.62	0.03	1.53	13.8	0.1	3.82	ND	2	9	7	2	70	277	127	354	20	ND	4	ND	13	320	97	112	20	93	21	5	23	3	22	5	13	2	13	2	11	2	ND	ND	ND	29	13	75	6623
BE35022	Beaume	Nozières	0.04	0.41	8.04	18.74	0.21	1.1	11.6	0.07	17.27	10	30	42	3	49	92	301	97	247	14	ND	6	5	78	598	73	87	15	70	16	3	18	3	17	3	9	1	9	1	8	1	ND	ND	ND	20	9	50	4498
BE3503	Beaume	Nozières	0.05	0.5	12.98	22.3	0.02	1.16	13	0.14	3.82	ND	ND	1	12	2	60	254	144	355	22	ND	2	ND	11	251	107	144	24	103	23	6	24	4	24	5	14	2	15	2	11	2	ND	ND	ND	33	12	79	7136
BE3504	Beaume	Nozières	0.07	0.54	12.81	21.41	0.17	1.29	14.3	0.13	3.75	ND	1	17	32	2	65	272	135	343	22	ND	3	ND	12	300	112	155	27	114	25	6	24	4	23	5	14	2	14	2	10	2	ND	6	ND	29	12	62	6719
BE3505	Beaume	Nozières	0.26	0.5	9.12	32.96	0.09	2.31	0.67	0.11	3.98	13	20	8	5	11	117	85	56	1011	22	1	3	2	10	462	57	118	13	56	11	2	11	2	10	2	6	ND	7	1	37	2	5	ND	ND	24	8	24	5876
BE3506	Beaume	Nozières	0.04	0.62	11.26	21.21	0.04	1.33	15.94	0.17	4.48	ND	ND	5	28	2	71	272	163	404	23	ND	4	ND	12	293	135	163	26	113	25	6	27	4	28	6	17	2	17	2	13	2	ND	ND	ND	42	13	83	7244
BE3507	Beaume	Nozières	0.05	0.54	12.62	21.62	0.02	1.13	15.22	0.12	3.2	ND	ND	ND	11	2	57	284	151	361	22	ND	3	ND	10	277	114	147	24	105	23	6	22	4	24	5	14	3	14	2	10	2	ND	ND	ND	35	11	69	6657
BE3508	Beaume	Nozières	0.05	0.56	12.81	22.51	0.03	1.24	12.64	0.14	3.85	ND	ND	3	18	2	68	251	152	409	23	ND	3	ND	13	286	117	159	25	106	24	6	24	4	26	6	16	2	17	2	12	2	ND	ND	ND	40	14	83	7720
BE3509	Beaume	Nozières	0.05	0.53	10.82	24.2	0.01	1.42	13.84	0.09	2.99	ND	ND	1	2	1	68	285	136	322	18	ND	2	ND	11	316	101	130	22	96	21	5	21	4	22	4	12	2	12	2	9	1	ND	ND	ND	29	14	61	6132
BE3510	Beaume	Nozières	0.05	0.53	12.44	21.94	0.02	1.21	14.39	0.13	3.63	ND	ND	2	11	1	63	275	156	380	24	ND	3	ND	12	290	120	158	25	107	23	6	23	4	25	5	15	2	15	2	11	2	ND	ND	ND	38	12	74	7095
BE3511	Beaume	Nozières	0.05	0.53	13.3	21.86	0.01	1.32	13.85	0.12	3.1	ND	ND	2	17	1	69	283	141	377	21	ND	2	ND	13	294	112	155	24	100	23	5	22	4	25	5	14	2	15	2	11	2	ND	ND	ND	38	14	71	7051
BE3512	Beaume	Nozières	0.06	0.62	12.63	21.25	0.01	1.2	16.56	0.13	2.31	1	ND	ND	7	1	56	310	152	347	18	ND	3	ND	9	330	116	152	25	106	23	5	21	4	24	5	14	2	14	2	9	1	ND	ND	ND	33	11	59	6437
BE3513	Beaume	Nozières	0.06	0.61	11.89	22.9	0.22	1.25	15.15	0.14	1.91	ND	2	6	50	2	69	295	139	287	15	ND	3	ND	11	317	108	155	27	103	22	6	21	3	21	5	12	2	12	2	7	1	ND	ND	ND	29	12	54	5986
BE3514	Beaume	Nozières	0.05	0.51	12.98	22.06	0.01	1.04	13.68	0.12	3.61	ND	ND	ND	11	1	61	266	155	382	24	ND	2	ND	10	275	125	164	26	109	24	5	22	4	26	5	15	2	15	2	11	2	ND	ND	ND	41	14	71	7057
BE3515	Beaume	Nozières	0.09	0.58	9.83	25.17	0.01	1.22	14.23	0.09	2.63	ND	ND	1	2	ND	60	273	109	286	16	ND	3	ND	8	364	91	118	20	83	17	4	16	3	18	4	10	1	9	1	8	1	ND	ND	ND	26	13	49	5447
BE3516	Beaume	Nozières	0.03	0.56	9.83	25.07	0.01	1.21	14.19	0.09	2.88	ND	ND	2	3	ND	58	278	111	283	17	ND	2	ND	8	330	93	123	21	85	18	4	17	3	18	4	10	1	10	1	8	1	ND	ND	ND	27	15	51	5638
BE3517	Beaume	Nozières	0.04	0.56	12.49	22.47	0.02	1.44	13.94	0.14	2.9	ND	ND	2	8	1	77	272	148	402	23	ND	2	ND	14	336	120	174	25	105	24	5	22	4	26	5	15	2	16	2	12	2	ND	ND	ND	43	17	78	7677
BE3518	Beaume	Nozières	0.07	0.6	12.95	20.62	0.02	1.02	16.1	0.13	3.34	ND	ND	2	13	1	57	298	165	364	25	ND	3	ND	10	290	122	164	27	115	26	6	22	4	26	5	15	2	15	2	10	2	ND	ND	ND	37	12	60	6894
BE3519	Beaume	Nozières	0.04	0.58	13.62	18.06	0.07	0.99	13.66	0.14	8.56	1	1	5	93	2	60	266	193	443	28	ND	4	ND	11	275	138	184	29	125	29	7	27	5	34	7	20	3	20	3	13	2	1	ND	ND	49	13	76	7247
BE3520	Beaume	Nozières	0.06	0.57	12.24	21.87	0.02	1.27	14.19	0.15	3.97	ND	ND	2	17	1	73	270	184	414	28	ND	2	ND	13	312	138	186	30	123	27	6	25	5	30	6	17	3	18	2	12	2	ND	ND	ND	45	14	76	7705
LN F1 decap	Les Nounins	Nozières	0.22	0.3	3.62	19.65	0.62	2.41	1.85	3.33	26.88	23	2	ND	185	2	120	67	322	87	8	ND	4	ND	10	1370	139	168	25	118	27	6	36	6	38	8	22	3	18	3	3	ND	15	8	ND	10	7	12	1353
LN001	Les Nounins	Nozières	ND	0.26	2.18	17.47	0.14	0.7	2.64	6.48	30.47	93	9	6	12	5	32	118	678	143	7	ND	5	ND	ND	4466	390	517	124	601	134	29	140	20	119	24	60	8	47	7	4	ND	ND	3	ND	7	7	7	1772
LN003	Les Nounins	Nozières	0.12	0.3	2.1	16.48	0.16	0.79	2.74	6.78	31.4	102	11	90	17	6	31	114	674	143	7	ND	5	1	ND	4343	366	509	117	556	122	27	124	20	115	23	59	8	46	7	4	ND	1	4	ND	7	7	7	1734
LN004 (987)	Les Nounins	Nozières	0.07	0.25	2.48	17.63	0.22	1.04	2.91	7.25	28.07	71	7	33	27	6	53	160	865	124	7	ND	6	ND	5	7474	590	850	197	967	220	50	233	31	181	35	87	11	67	9	4	ND	2	22	ND	9	12	4	1521
LN005	Les Nounins	Nozières	0.61	0.29	2.95	19.56	0.86	0.8	2.13	3.78	27.79	8	3	7	82	3	75	87	378	82	8	ND	6	ND	8	1067	174	196	30	146	32	8	47	7	44	10	26	3	20	3	3	ND	ND	4	ND	13	9	13	1735
LN006	Les Nounins	Nozières	0.09	0.87	1.01	20.37	0.45	0.67	0.76	5.78	29.53	ND	ND	17	137	4	27	27	113	19	3	ND	5	ND	2	377	47	71	10	44	10	3	14	2	12	3	8	1	7	1	ND	ND	ND	11	ND	4	3	8	776
LN008 (807)	Les Nounins	Nozières	0.1	0.24	1.17	16.45	0.25	0.47	0.95	1.79	39.61	374	79	12	15	2	15	34	95	121	5	ND	5	2	2	335	41	53	9	44	10	2	12	2	11	2	7	1	6	ND	4	ND	1	38	ND	5	2	6	1428
LN010 (809)	Les Nounins	Nozières	0.14	0.35	4.59	18.23	0.4	0.52	1.99	0.81	31.72	332	37	26	47	6	22	137	90	415	18	1	7	ND	2	308	86	161	22	92	21	4	18	3	16	3	8	1	6	1	12	2	45	12	ND	22	10	7	2679
LN012	Les Nounins	Nozières	0.04	0.28	2.64	18.52	0.52	0.91	2.99	2.03	31.47	53	23	63	5	5	37	128	229	172	9	2	6	ND	3	1017	160	221	31	140	33	7	40	5	30	6	16	2	12	2	5	ND	2	3	ND	9	4	6	2041
LN014 (808)	Les Nounins	Nozières	ND	0.56	3.78	25.83	0.03	1.03	2.57	18.83	4.26	16	43	16	41	4	48	263	2638	65	6	ND	3	2	3	1428	341	390	92	566	160	41	288	45	277	63	165	21	121	19	2	ND	ND	ND	ND	9	4	21	1716
LN015	Les Nounins	Nozières	0.07	0.17	2.37	16.35	0.25	0.05	1.2	3.18	36.94	874	259	77	8	15	4	51	394	149	9	2	5	1	1	1277	141	334	40	200	50	13	65	9	55	12	30	4	22	3	5	ND	2	2	ND	9	9	4	1595
LN018 (806)	Les Nounins	Nozières	0.02	0.06	2.42	10.68	0.17	1	0.49	0.17	45.93	19549	8629	285	5	92	46	8	48	97	5	17	5	6	3	133	32	58	8	38	8	2	9	1	7	1	4	ND	3	ND	3	ND	1	ND	ND	6	2	2	1058
LN030	Les Nounins	Nozières	0.14	0.22	1.59	8.57	0.13	0.66	1.68	0.45	51.49	619	249	62	18	37	31	74	36	95	4	2	6	1	2	398	32	85	8	36	7	2	7	1	6	1	3	ND	3	ND	3	ND	7	7	ND	7	2	2	898
LR001	Les Rougeaux	Nozières	0.09	0.28	4.47	17.88	0.25	1.4	1.05	1.85	32.03	33	25	38	147	4	75	102	433	121	11	ND	6	1	12	408	280	304	48	239	51	13	68	10	60	13	33	4	28	4	4	ND	2	15	ND	15	6	10	2213
LR002	Les Rougeaux	Nozières	ND	0.19	5.89	15.15	0.28	0.94	1.09	1.81	34.71	145	65	42	267	5	64	73	449	148	12	ND	6	1	8	596	236	316	42	194	44	11	54	9	54	12	31	4	23	3	5	ND	2	21	ND	22	9	12	2244
LR003 (988)	Les Rougeaux	Nozières	0.1	0.19	6.74	20.65	0.31	1.61	2.47	1.72	23.25	11	8	18	54	7	66	185	490	180	14	ND	5	1	8	833	289	321	49	233	50	12	65	10	60	13	33	4	25	3	5	ND	1	7	ND	22	12	16	3281
PE001	Petit Plaix	Nozières	0.07	0.58	3.75	24.52	0.31	1.56	2.05	4.23	19.49	9	4	11	15	2	68	134	138	110	8	ND	5	ND	9	629	82	76	16	63	12	3	15	2	14	3	8	1	7	1	3	ND	2	2	ND	11	4	12	1845
PE002	Petit Plaix	Nozières	ND	0.72	5.03	28.61	0.12	2.52	4.12	3.9	9.19	4	ND	5	14	ND	80	227	171	194	12	ND	11	1	7	722	111	118	20	91	17	4	22	3	19	4	11	2	9	1	6	ND	ND	2	ND	15	9	15	2985
PE003	Petit Plaix	Nozières	0.11	0.15	3.67	38.7	0.09	1.67	0.63	0.78	2.91	5	5	2	29	1	74	64	41	674	28	ND	4	ND	5	345	37	57	7	27	6	ND	5	ND	7	1	4	ND	5	ND	22	3	3	7	ND	18	5	10	8033
PE004	Petit Plaix	Nozières	0.09	0.15	3.27	38.91	0.11	0.94	0.48	0.3	4.39	9	14	17	13	ND	52	70	51	788	23	ND	5	ND	4	353	51	80	10	40	8	1	8	1	8	2	5	ND	6	ND	28	2	3	23	ND	19	5	10	6920
PE005	Petit Plaix	Nozières	0.2	0.64	5.2	26.54	0.25	1.69	3.38	3.78	13.41	14	ND	ND	9	ND	74	146	140	140	10	ND	3	ND	8	511	98	106	19	84	16	4	18	2	17	4	10	1	9	2	4	ND	ND	ND	ND	14	8	14	2616
PE008	Petit Plaix	Nozières	ND	0.99	7.33	25.11	0.19	2.76	3.69	2.04	12.75	12	15	ND	64	3	106	147	100	257	15	ND	5	ND	9	458	74	117	16	72	15	3	16	3	14	3	8	1	8	1	8	1	ND	6	ND	15	9	18	4035
PE3701	Petit Plaix	Nozières	0.08	0.48	2.98	22.21	0.28	1.17	3.47	6.15	21.42	3	ND	1	15	ND	50	224	143	101	7	ND	3	ND	5	570	98	68	16	72	14	3	15	2	14	3	8	1	6	1	3	ND	ND	ND	ND	11	6	9	1546
PE37021	Petit Plaix	Nozières	0.05	0.76	5.38	20.89	0.14	2.82	3.02	5.13	20.01	5	ND	3	40	ND	85	159	63	184	10	ND	4	ND	5	303	49	68	10	44	9	2	8	1	8	2	5	ND	4	ND	5	ND	ND	15	ND	11	5	12	2602
PE37022	Petit Plaix	Nozières	0.05	0.75	6.29	22.67	0.13	3.1	4.54	5.51	13.94	2	1	2	34	ND	91	240	93	261	14	ND	5	ND	6	446	75	102	16	67	13	3	13	2	12	3	7	ND	6	ND	8	ND	ND	ND	ND	17	6	15	3595
PE37023	Petit Plaix	Nozières	0.06	0.75	5.94	22.68	0.17	3.02	4.65	5.83	14.01	3	1	1	40	1	84	233	90	255	14	ND	5	ND	6	426	71	97	15	65	13	3	13	2	11	2	6	ND	6	ND	8	1	ND	ND	ND	16	5	15	3472
PE37031	Petit Plaix	Nozières	0.09	1.06	7.09	20.1	0.29	2.32	6.54	2.4	17.62	4	1	2	12	1	84	235	134	184	12	ND	5	ND	7	556	93	114	19	84	16	4	16	2	15	3	9	1	9	1	5	ND	ND	2	ND	15	7	17	3273
PE37032	Petit Plaix	Nozières	0.07	1.09	7.61	19.23	0.27	2.24	6.88	2.42	17.94	3	ND	2	13	ND	88	237	146	197	13	ND	7	ND	7	563	101	117	19	88	17	4	18	3	17	4	10	1	9	1	6	ND	ND	ND	ND	17	7	18	3345
PE37033	Petit Plaix	Nozières	0.08	0.83	6.24	17.06	0.33	1.55	6.27	2.03	24.78	12	3	9	21	ND	55	215	143	200	12	ND	6	ND	4	521	94	113	18	85	16	4	17	3	16	4	10	1	9	1	6	ND	1	4	ND	15	6	16	3134
PE3704	Petit Plaix	Nozières	0.06	0.46	4.7	19.32	0.34	1.78	1.67	4.05	26.47	6	ND	1	62	ND	66	171	95	132	9	ND	4	ND	5	680	71	99	15	69	14	3	15	2	13	3	7	ND	6	ND	4	ND	ND	ND	ND	11	7	12	2332
PE3705	Petit Plaix	Nozières	0.04	0.54	3.72	16.84	0.23	1.25	3.46	5.37	28.96	60	5	7	252	ND	48	127	97	131	8	ND	5	ND	4	2337	67	83	13	60	12	3	12	2	12	3	7	ND	6	ND	4	ND	ND	ND	ND	9	6	10	2045
PE3706	Petit Plaix	Nozières	0.06	0.89	7.29	20.9	0.18	2.42	5.37	2.86	17.22	3	ND	1	17	2	93	175	139	185	13	ND	4	ND	8	402	97	129	20	93	18	4	18	3	16	4	9	1	9	1	5	ND	ND	ND	ND	15	9	18	3418
PE3707	Petit Plaix	Nozières	0.06	0.69	4.49	14.9	0.23	1.34	2.88	0.9	35.39	45	26	8	92	2	51	115	86	136	8	ND	4	ND	4	298	54	70	10	45	9	2	9	1	9	2	6	ND	5	ND	4	ND	1	ND	ND	9	6	12	2065
PE3708	Petit Plaix	Nozières	0.05	1.04	7.09	23.09	0.12	3.14	6.31	0.49	14.67	ND	ND	1	5	1	105	169	299	277	14	ND	4	ND	10	394	130	164	25	119	25	6	33	5	32	7	20	3	15	2	8	1	ND	ND	ND	15	7	18	3737
PE3709	Petit Plaix	Nozières	0.05	0.61	4.3	14.6	0.23	1.43	3.82	6.95	29.62	133	8	5	440	ND	61	100	56	158	9	ND	4	ND	5	727	54	78	11	45	9	2	8	1	7	2	4	ND	4	ND	4	ND	1	4	ND	10	6	10	2123
PE3710	Petit Plaix	Nozières	0.05	0.42	5.54	18.11	0.25	2.06	0.44	0.76	31	116	175	32	826	55	75	37	44	92	65	4	6	2	7	205	35	45	6	27	5	1	6	ND	6	1	4	ND	4	ND	3	2	2	2	ND	8	4	17	4589
PE3711	Petit Plaix	Nozières	0.05	0.47	3.66	12.19	0.19	1.26	2.95	1.99	39.85	29	4	6	8	ND	51	109	84	128	7	ND	4	ND	4	331	51	64	10	45	9	2	10	1	9	2	5	ND	5	ND	4	ND	1	ND	ND	8	4	10	2212
PE3712	Petit Plaix	Nozières	0.04	0.84	5.98	22.42	0.09	2.88	2.73	2.45	19.49	16	ND	3	49	ND	96	104	37	257	13	ND	4	ND	9	327	44	71	10	39	7	2	6	1	6	1	3	ND	3	ND	7	ND	ND	ND	ND	11	4	13	3510
PE3713	Petit Plaix	Nozières	0.04	0.57	4.03	24.4	0.25	4.36	3.47	3.73	15.89	17	15	10	37	1	111	179	120	296	14	ND	6	ND	7	1715	68	86	17	86	19	4	19	3	16	3	9	1	8	1	8	ND	2	ND	ND	11	4	11	3496
PE3714	Petit Plaix	Nozières	ND	0.75	6.51	24.15	0.16	2.82	1.93	2.27	17.08	28	6	ND	80	ND	93	146	135	281	13	ND	4	1	6	431	69	102	14	66	13	3	15	2	16	4	10	1	8	1	9	1	ND	2	ND	14	8	15	4255
PE3715	Petit Plaix	Nozières	0.09	0.39	4.91	16.71	0.38	1.43	2.87	0.44	32.32	145	46	71	53	3	50	239	42	233	14	1	9	14	3	498	75	94	14	50	10	4	10	3	8	2	5	ND	4	ND	9	3	7	8	2	13	3	9	3290
PE3716	Petit Plaix	Nozières	0.04	0.94	8.98	23.39	0.19	2.4	4.5	0.62	13.85	33	10	ND	19	2	109	128	119	268	16	ND	6	ND	8	409	98	141	20	89	16	4	16	3	16	3	10	1	9	2	9	1	2	5	ND	20	11	20	5024
PE3717	Petit Plaix	Nozières	0.24	0.36	2.53	14.11	0.29	1.29	2.65	0.15	40.16	41	31	2	13	4	36	150	35	190	9	2	5	ND	4	287	27	53	5	24	4	1	5	ND	5	1	3	1	3	ND	8	ND	2	11	ND	8	4	3	2218
PE3718	Petit Plaix	Nozières	ND	0.98	5.06	25.52	0.14	1.81	8.62	1.37	11.89	4	ND	60	8	1	61	135	259	203	13	ND	5	2	10	458	145	150	24	114	22	5	28	4	28	7	19	2	15	2	7	ND	ND	6	ND	21	7	16	3371
PE3719	Petit Plaix	Nozières	0.03	1.04	9.27	22.24	0.28	2.69	5.33	0.65	13.91	5	ND	ND	13	1	111	141	101	217	15	ND	8	2	7	409	96	140	21	91	16	4	15	2	15	3	9	1	8	1	7	1	1	22	ND	18	9	20	4762
PE3720	Petit Plaix	Nozières	0.05	0.61	3.61	24.41	0.2	1.6	3.46	5.14	17.68	7	11	ND	7	ND	60	215	189	142	9	ND	4	1	7	775	114	103	20	93	18	4	22	3	20	5	12	2	10	1	5	1	2	3	ND	12	5	11	2510
PC001	Petits Champs	Nozières	0.04	0.37	2.95	19.02	0.4	1.67	3.98	2.58	28.31	36	4	8	6	1	59	168	206	197	9	ND	5	ND	3	1051	119	159	25	118	26	6	33	5	28	6	15	2	11	2	6	ND	2	2	ND	9	4	7	2239
PC002 (985)	Petits Champs	Nozières	0.15	0.38	2.53	16.13	0.46	1.4	3.87	2.51	33.45	10	1	3	8	1	46	152	220	168	9	ND	5	ND	2	1052	118	161	25	118	26	6	33	5	29	6	16	2	12	2	5	ND	2	4	ND	8	4	7	1903
PC003	Petits Champs	Nozières	0.03	0.41	2.9	19.04	0.45	1.75	4.83	2.36	27.52	6	2	2	6	1	63	189	200	219	10	ND	4	ND	2	1183	116	156	24	116	25	6	31	5	27	6	15	2	12	2	7	ND	3	3	ND	11	4	7	2310
PC003 bis	Petits Champs	Nozières	0.19	0.32	2.29	15.62	0.43	1.16	3.29	2.06	35.76	32	5	16	20	3	46	135	181	184	8	ND	4	ND	2	966	102	153	23	107	22	5	29	5	25	5	14	2	11	2	6	ND	2	1	ND	9	4	5	2058
PC004	Petits Champs	Nozières	0.06	0.55	1.98	21.05	0.35	1.27	3.21	2.47	27.67	27	26	8	24	2	45	116	137	140	8	ND	5	ND	2	743	74	105	16	79	16	4	22	3	19	4	11	1	9	1	5	ND	2	3	ND	7	4	6	2057
PC005	Petits Champs	Nozières	0.26	0.35	2.43	19.04	0.46	1.49	3.23	2.46	29.67	12	9	32	79	1	58	152	182	169	9	ND	12	ND	3	1145	117	222	26	127	28	6	35	4	28	6	16	2	13	2	8	ND	2	494	ND	10	6	2	2021
PC006	Petits Champs	Nozières	0.19	0.26	1.87	16.89	0.52	1	1.9	1.95	35.96	98	62	115	22	12	50	84	157	136	7	3	7	3	3	1315	90	172	19	89	19	5	23	4	23	5	13	2	10	2	4	ND	6	5	ND	7	5	5	1578
PC007	Petits Champs	Nozières	0.22	0.27	3	18.75	0.55	1.51	3.19	1.88	29.84	13	7	24	25	6	61	148	162	214	13	ND	18	4	4	1031	116	217	26	120	26	6	30	4	25	5	14	2	11	2	7	1	3	186	ND	12	8	3	2591
PC008 (984)	Petits Champs	Nozières	0.27	0.3	2.22	18.4	0.4	1	2.61	1.88	32.69	18	4	ND	20	2	44	112	160	194	8	ND	4	ND	3	857	93	144	20	97	21	5	26	4	22	5	12	2	10	1	6	ND	2	ND	ND	9	4	4	1964
PC010	Petits Champs	Nozières	0.09	0.36	0.67	10.79	0.24	0.17	1.54	1.27	48.97	72	36	14	7	2	10	26	18	87	3	ND	5	ND	ND	160	15	38	3	14	2	ND	3	ND	2	ND	2	ND	2	ND	2	ND	ND	3	ND	2	2	4	1160
CHEVAL-1	Cheval	Nozières	ND	0.22	0.72	11.57	0.1	0.02	0.59	5.18	45.78	162	52	51	29	8	ND	22	334	34	2	ND	12	2	ND	385	67	421	19	95	26	8	34	7	47	11	33	5	30	5	1	ND	ND	14	ND	2	3	6	404
CHEVAL-2	Cheval	Nozières	ND	0.17	0.5	1.7	0.05	0.02	0.03	1.94	64.54	22	4	32	26	ND	ND	2	43	19	1	ND	11	ND	ND	13	8	66	3	12	4	ND	4	ND	6	1	4	ND	3	ND	ND	ND	ND	6	ND	1	1	10	583
CHEVAL-3	Cheval	Nozières	0.05	0.32	1.44	9.08	0.17	0.48	1.21	4.32	47.64	56	6	7	20	5	13	100	568	54	4	ND	20	4	1	2169	332	1352	76	359	84	19	87	13	77	17	42	6	35	5	2	ND	ND	790	ND	7	5	9	880
LN002-1a	Les Nounins	Nozières	ND	0.17	2.29	13.12	0.11	0.92	2.88	5.34	37.43	32	2	7	30	9	39	137	693	146	7	ND	10	ND	2	6389	626	819	178	854	179	41	163	24	131	25	62	8	45	6	4	ND	ND	87	ND	8	8	6	1662
LN002-1b	Les Nounins	Nozières	ND	0.19	0.96	11.65	0.2	0.27	1.72	1.86	46.85	98	15	9	11	5	13	26	121	88	5	ND	10	ND	ND	549	66	103	20	95	21	5	20	3	21	4	12	2	11	2	3	ND	ND	18	ND	4	3	4	1238
LN002-2	Les Nounins	Nozières	0.02	0.16	1.38	11.35	0.07	0.48	2.17	1.88	46.24	89	10	11	11	3	20	59	160	117	5	ND	12	ND	ND	1215	115	153	34	166	36	8	34	5	28	6	15	2	11	2	3	ND	ND	28	ND	4	2	4	1204
LN004-2	Les Nounins	Nozières	0	0.19	1.75	10.09	0.1	0.59	2.05	5.36	44.06	43	ND	5	7	8	24	101	616	95	4	ND	14	ND	1	4317	435	552	125	629	143	31	136	20	113	21	55	7	42	6	3	ND	ND	4	ND	5	5	6	1062
LN007-1	Les Nounins	Nozières	0.06	0.23	3.45	14.28	0.13	0.89	0.9	3.99	37.22	14	6	6	37	3	70	91	346	122	10	ND	15	ND	8	3744	349	958	82	364	77	23	66	10	59	12	31	4	25	4	4	ND	1	3088	ND	14	10	11	2298
LN007-2	Les Nounins	Nozières	0.02	0.27	0.76	11	0.09	0.27	0.19	3.92	47.8	8	13	19	48	15	13	13	169	49	4	ND	8	ND	1	954	59	154	14	67	17	5	20	4	23	6	17	2	16	3	2	ND	ND	33	ND	2	3	10	838
LN009-1	Les Nounins	Nozières	0.01	0.03	0.47	4.38	0.04	0.05	0.29	0.05	62.14	887	37	28	8	2	5	6	10	28	2	ND	8	ND	1	69	8	9	2	10	2	ND	2	ND	1	ND	ND	ND	ND	ND	ND	ND	ND	8	ND	1	3	ND	412
LN1S2C3-1	Les Nounins	Nozières	ND	0.19	1.4	12.11	0.07	0.52	4.76	0.51	43.78	86	20	10	7	7	20	71	52	125	5	ND	13	1	ND	441	47	66	11	50	11	2	10	2	9	2	5	ND	4	ND	4	ND	ND	193	ND	5	2	5	1763
LN1S2C3-2	Les Nounins	Nozières	0.06	0.2	2.43	12.28	0.1	0.98	5.26	0.53	41.12	73	10	14	25	7	39	101	58	143	7	ND	11	ND	2	556	59	78	15	74	15	4	13	2	11	2	5	ND	4	ND	4	ND	1	491	ND	5	3	5	1609
LNZ1C1001-1	Les Nounins	Nozières	0.13	0.18	2.01	8.95	0.09	0.95	1.21	0.11	50.94	825	347	20	23	19	61	71	22	80	9	1	11	ND	11	279	28	77	7	28	6	1	5	ND	4	ND	2	ND	2	ND	2	ND	3	44	ND	6	3	4	1937
LNZ1F1C0010-1	Les Nounins	Nozières	0.01	0.18	1.54	13.01	0.18	0.61	1.67	5.15	40.76	128	10	11	33	5	18	70	242	59	3	ND	8	ND	1	2259	171	524	42	205	48	10	44	7	39	8	21	3	17	2	2	ND	ND	15	ND	5	5	6	453
LNZ1F1C0010-2a	Les Nounins	Nozières	0.02	0.14	1.36	9.81	0.2	0.34	2.78	4.72	45.09	73	5	4	46	6	6	152	345	86	7	ND	11	ND	ND	2997	324	969	71	337	74	17	69	10	59	11	29	4	20	3	2	ND	ND	312	ND	8	8	7	691
LNZ1F1C0010-2b	Les Nounins	Nozières	ND	0.09	2.28	7.62	0.11	0.11	1.92	5.45	48.02	78	13	5	51	4	4	37	244	48	4	ND	12	ND	ND	1479	106	320	26	131	28	7	32	5	36	8	23	3	19	3	1	ND	ND	11	ND	3	4	6	884
LNZ1S01C0010-1	Les Nounins	Nozières	0.02	0.19	1.31	11.88	0.14	0.75	1.93	4.39	43.03	128	19	5	5	2	25	87	544	117	5	ND	11	ND	ND	1859	150	178	40	224	59	14	79	12	68	14	36	5	27	4	3	ND	ND	242	ND	6	2	4	1081
LNZ1S01C0010-1 foire	Les Nounins	Nozières	ND	0.17	0.89	12.15	0.11	0.63	1.69	4.75	43.34	106	61	ND	7	ND	ND	66	463	109	4	ND	8	ND	ND	1503	136	157	34	184	46	12	62	9	57	13	33	4	25	4	3	ND	ND	ND	ND	5	1	ND	1157
LNZ1S01C0010-2	Les Nounins	Nozières	0.04	0.54	4	20.42	0.09	1.8	2.73	15.57	14.02	1	3	ND	34	6	77	314	2776	76	8	ND	12	ND	7	2880	591	579	141	847	229	63	344	48	279	62	156	19	106	15	2	ND	ND	2	ND	14	6	13	1854
LNZ1S01C0010-2 foire	Les Nounins	Nozières	ND	0.59	2.25	19.03	0.07	1.29	1.63	17.85	18.15	4	17	ND	32	2	60	220	1512	47	5	ND	8	ND	5	2177	363	372	82	482	133	47	184	27	157	35	92	11	65	10	1	ND	ND	1111	ND	9	4	ND	1155
LNZ1S01C0010-3	Les Nounins	Nozières	0.01	0.25	1.41	9.5	0.14	0.71	2.46	7.08	43.08	13	12	6	8	5	24	117	737	76	4	ND	11	ND	ND	5505	489	603	146	731	168	37	160	23	134	25	65	8	51	7	2	ND	ND	7	ND	5	7	4	1063
LNZ1S01C0010-3 foire	Les Nounins	Nozières	ND	0.24	1.06	10.24	0.12	0.52	2.04	6.76	43.38	15	52	2	24	1	ND	96	627	72	4	ND	13	ND	ND	4820	484	628	135	655	145	32	130	20	123	24	63	8	50	7	2	ND	ND	66	ND	5	7	ND	1292
LNZ1S01C0010-4	Les Nounins	Nozières	0.05	0.19	1.53	11.71	0.11	0.63	1.95	4.88	42.18	61	16	7	145	8	33	92	502	114	5	ND	13	ND	ND	3599	327	426	101	501	110	24	108	16	90	18	45	6	33	5	3	ND	ND	3482	ND	6	5	4	1222
LNZ1S01C0010-4 foire	Les Nounins	Nozières	ND	0.19	0.81	12.69	0.09	0.33	1.53	5.35	42.39	57	31	ND	6	ND	9	54	439	97	4	ND	6	ND	ND	2521	233	317	66	328	73	17	69	12	74	16	44	6	36	6	3	ND	ND	ND	ND	4	4	ND	1152
LNZ1S0F1-1	Les Nounins	Nozières	0.03	0.08	0.78	6.82	0.88	0.32	0.21	1.19	55.43	384	196	8	245	2	23	16	96	23	1	ND	8	ND	7	481	54	93	6	34	10	3	15	2	15	3	8	1	8	1	ND	ND	ND	15	ND	2	2	4	398
LNZ1S0F1-2	Les Nounins	Nozières	0	0.07	1.48	3.68	0.47	0.09	0.11	1.29	60.08	216	77	5	147	2	5	14	62	30	3	ND	13	ND	ND	1443	24	82	5	28	7	2	10	1	8	2	5	ND	4	ND	ND	ND	ND	2	ND	2	ND	2	475
LNZ1S0F1-2 foire	Les Nounins	Nozières	0.11	0.08	1.33	4.45	0.31	0.12	0.1	1.28	59.29	258	114	2	230	ND	27	10	41	28	2	ND	10	ND	13	763	16	39	3	17	4	1	6	ND	6	1	4	ND	3	ND	ND	ND	ND	3	ND	1	ND	2	453
LNZ1S0F1-3	Les Nounins	Nozières	0.1	0.06	2.86	9.97	0.46	1.8	3.42	2.43	42.55	78	26	28	17	8	58	172	352	148	8	ND	11	ND	4	4491	250	661	65	317	70	17	72	11	58	11	28	3	19	3	4	ND	1	56	ND	10	7	4	1454
LNZ1S0F1-3 foire	Les Nounins	Nozières	0.03	0.28	0.7	11.41	0.15	0.51	1.21	4.13	45.7	112	41	7	22	2	23	38	129	53	2	ND	9	ND	3	1176	74	189	17	84	19	4	19	3	21	5	12	2	11	2	2	ND	ND	381	ND	3	2	3	861
LR001-2	Les Rougeaux	Nozières	0.08	0.23	2.63	10.79	0.13	0.41	0.52	1.47	47.33	7	5	9	67	1	29	37	234	68	6	ND	10	ND	4	158	113	109	18	91	21	5	27	5	29	6	17	2	16	2	2	ND	ND	5	ND	7	1	8	1353
LR001-3	Les Rougeaux	Nozières	ND	0.19	2.75	10.19	0.15	0.61	0.49	1.34	48.17	7	ND	11	96	ND	37	20	178	63	5	ND	8	ND	5	219	68	75	13	61	14	4	19	3	22	5	13	2	12	2	2	ND	ND	22	ND	7	1	7	1228
LR001-4	Les Rougeaux	Nozières	0.06	0.22	3.53	11.49	0.15	0.94	0.68	1.35	44.53	19	6	14	66	2	44	66	281	84	7	ND	17	ND	6	253	175	178	26	133	30	7	37	6	36	7	20	2	16	2	2	ND	ND	8	ND	9	2	8	1424
LR001-5	Les Rougeaux	Nozières	ND	0.22	2.54	11.71	0.16	0.75	0.51	1.66	45.6	20	15	18	105	ND	50	61	268	80	7	ND	17	ND	5	287	186	225	26	131	28	8	33	6	35	7	20	3	16	2	3	ND	1	91	ND	9	2	8	1527
LR002-2	Les Rougeaux	Nozières	ND	0.2	2.77	9.72	0.17	0.48	0.52	1.44	48.74	74	23	22	156	2	26	36	200	62	5	ND	9	ND	3	260	90	130	16	78	18	5	22	3	22	5	13	2	10	1	2	ND	ND	34	ND	6	3	9	1359
PC001-2	Petits Champs	Nozières	0.03	0.11	3.4	12.34	0.43	1.62	3.81	1.41	39.09	3	1	16	10	5	54	172	178	209	9	ND	16	1	3	1101	115	148	24	116	25	6	28	4	24	5	13	1	8	1	5	ND	2	1744	ND	9	4	5	2230
PC003-2	Petits Champs	Nozières	0.02	0.31	1.74	13.58	0.29	0.97	3.1	1.78	40.02	6	ND	4	4	1	35	109	117	141	6	ND	13	ND	2	715	73	96	14	68	15	3	17	3	16	3	9	1	7	1	4	ND	ND	2063	ND	6	3	7	1464
PC003-3	Petits Champs	Nozières	0.07	0.33	1.57	13.06	0.27	0.85	2.85	1.87	41.91	4	3	3	9	1	30	93	103	119	5	ND	15	ND	2	588	58	77	12	54	12	3	15	2	13	3	7	ND	6	ND	3	ND	ND	658	ND	4	2	5	1426
PC003-4	Petits Champs	Nozières	0.04	0.32	1.56	12.54	0.27	0.82	2.34	1.79	43.35	6	3	6	10	1	30	83	106	113	5	ND	18	ND	1	555	56	75	12	57	13	3	15	2	14	3	8	ND	6	ND	3	ND	1	1079	ND	5	2	5	1258
PC004-2	Petits Champs	Nozières	0.01	0.3	2.01	12.64	0.31	1.01	2.9	1.98	41.6	2	2	4	7	2	37	114	118	124	5	ND	13	ND	2	713	67	89	15	67	15	4	17	3	16	3	8	1	6	ND	3	ND	ND	1538	ND	5	2	6	1433
PC005-2	Petits Champs	Nozières	0.01	0.28	2.1	12.58	0.33	1.06	2.59	1.93	42.01	7	ND	5	7	ND	36	108	117	119	5	ND	15	ND	2	751	69	130	15	72	16	4	18	2	16	3	8	1	7	ND	3	ND	ND	235	ND	5	3	5	1363
PC005-3	Petits Champs	Nozières	ND	0.26	1.9	13.95	0.37	1.22	2.58	1.87	40.06	6	13	12	12	3	46	115	136	138	7	ND	12	ND	2	870	95	187	19	89	19	5	20	3	18	4	10	1	8	1	4	ND	2	78	ND	7	5	6	1706
PC007-2	Petits Champs	Nozières	0.03	0.17	2.56	16.6	0.41	0.56	2.31	1.15	36.75	14	9	10	24	14	27	119	118	162	7	ND	15	ND	2	515	84	136	19	87	18	4	20	3	18	3	9	1	7	ND	4	ND	2	42	ND	7	5	5	1541
PC007-3	Petits Champs	Nozières	0.02	0.13	2.45	11.93	0.35	1.31	3.04	1.4	42.38	5	3	5	13	1	51	143	141	182	8	ND	11	ND	2	935	97	184	20	94	21	5	22	3	20	4	11	1	8	1	5	ND	2	53	ND	7	4	5	1969
PP001-2	Petit Plaix	Nozières	0.03	0.37	2.87	19.32	0.26	1.38	1.97	3.19	30.05	7	7	19	61	6	57	110	100	84	7	ND	10	ND	8	506	71	82	11	53	11	4	12	2	10	2	6	ND	5	ND	2	ND	ND	291	ND	8	4	9	1688
PP002-2	Petit Plaix	Nozières	0.01	0.63	4.6	24.34	0.1	2.35	3.69	3.68	17.14	ND	ND	1	5	2	69	211	147	178	10	ND	15	ND	7	656	100	101	17	80	16	4	18	3	15	3	9	1	7	1	5	ND	ND	2	ND	12	6	13	2739
PP003-2	Petit Plaix	Nozières	0.03	0.31	4.02	30.4	0.13	4.61	1.17	1.28	11.81	6	6	3	123	ND	127	78	47	325	12	ND	11	ND	9	334	34	51	7	29	5	1	5	ND	6	1	3	ND	3	ND	8	ND	ND	41	ND	8	3	9	3704
PP005-2	Petit Plaix	Nozières	0.01	0.48	4.86	21.16	0.22	1.49	3.04	3.04	23.57	15	ND	5	16	ND	61	131	114	128	9	ND	10	ND	6	436	82	81	15	66	12	3	14	2	12	3	7	ND	6	ND	3	ND	ND	25	ND	10	5	12	2472
PP005-3	Petit Plaix	Nozières	0.04	0.49	4.45	20.97	0.21	1.46	2.91	3.14	24.46	15	ND	4	8	1	56	124	110	120	8	ND	12	ND	6	417	80	78	14	63	12	3	12	2	11	2	7	ND	6	ND	3	ND	ND	9	ND	10	5	13	2204
PP008-2	Petit Plaix	Nozières	0.01	0.85	6.2	20.99	0.13	2.24	3	1.75	22	6	2	2	40	1	81	119	67	186	11	ND	14	ND	7	358	51	82	12	51	11	2	10	2	9	2	5	ND	5	ND	5	ND	ND	7	ND	10	6	14	3283
PPSOND1-2	Petit Plaix	Nozières	0.02	0.38	2.3	9.93	0.26	1.03	1.63	1.15	47.45	31	6	5	2	ND	25	67	16	113	5	ND	13	ND	2	167	17	26	4	15	3	ND	3	ND	2	ND	1	ND	1	ND	3	ND	2	24	ND	4	1	5	1405
PA0208	Le Parc	Allogny	0.14	0.14	3.91	17.92	0.3	0.51	0.16	0.2	35.96	40	48	3	197	261	33	42	35	64	7	ND	5	ND	3	148	23	59	7	36	10	2	10	2	9	2	5	ND	4	ND	2	ND	2	24	ND	7	4	17	2476
PA0209	Le Parc	Allogny	ND	0.17	4.1	7.89	0.61	0.74	0.12	0.25	50.22	66	83	ND	534	256	49	38	30	58	5	ND	3	ND	4	114	21	56	5	23	5	1	6	1	6	1	3	ND	3	ND	1	ND	1	18	ND	4	5	16	1493
PA0210	Le Parc	Allogny	0.02	0.23	6.28	10.57	0.19	0.68	0.13	0.17	43.92	40	62	19	320	118	54	55	28	75	9	ND	3	3	6	173	32	71	7	35	9	2	8	1	8	1	4	ND	5	ND	2	ND	2	29	ND	15	11	22	2593
PA0211	Le Parc	Allogny	0.06	0.25	3.28	6	0.56	0.44	0.16	0.38	54.08	26	112	2	394	261	38	351	47	58	4	1	4	ND	4	261	78	187	24	91	19	5	18	2	12	2	6	ND	5	ND	1	ND	2	14	ND	17	10	24	1141
USMIN01	Les Usages	Allogny	ND	0.14	8.82	11.97	0.49	0.67	0.04	0.08	37.92	35	179	5	455	471	49	50	62	151	16	1	4	3	6	121	57	202	18	73	16	4	16	3	15	3	8	1	8	1	4	ND	2	118	5	80	9	31	4194
USMIN021	Les Usages	Allogny	0.04	0.18	7.42	10.25	0.28	0.67	0.12	1.93	40.65	463	172	10	509	292	50	67	57	152	12	3	4	2	6	3845	33	128	9	41	11	3	12	2	13	3	6	ND	7	ND	4	ND	2	266	3	50	9	30	3229
USMIN022	Les Usages	Allogny	0.04	0.18	7.59	10.97	0.48	0.82	0.04	0.06	40.91	46	205	12	448	388	62	35	50	122	15	1	5	1	8	115	33	68	9	36	8	2	10	2	11	2	6	ND	6	ND	3	ND	2	43	3	44	10	29	4189
USMIN03	Les Usages	Allogny	0.06	0.21	8.97	16.26	0.66	0.9	0.09	0.06	30.45	31	260	32	814	591	63	52	93	162	25	3	7	2	8	155	49	110	15	74	22	6	25	5	26	5	12	2	12	2	4	2	4	67	2	88	15	44	5637
USMIN041	Les Usages	Allogny	0.06	0.18	9.14	11.93	0.44	0.76	0.04	0.1	37.36	50	193	1	509	403	57	75	74	185	16	2	6	ND	6	174	74	150	22	99	23	5	24	4	22	4	10	2	10	1	6	1	3	100	7	129	13	43	4506
USMIN042	Les Usages	Allogny	0.03	0.17	8.87	11.03	0.48	0.77	0.06	0.58	38.6	280	257	14	449	355	57	102	77	163	13	3	4	2	6	749	73	300	22	101	23	5	24	4	23	4	11	2	11	1	4	ND	4	299	8	84	11	46	3679
USMIN05	Les Usages	Allogny	0.1	0.18	8.1	11.81	0.5	0.92	0.07	0.07	38.84	41	183	13	377	363	70	42	50	139	14	1	20	1	9	144	38	71	10	42	9	3	10	2	12	2	7	1	7	ND	4	ND	2	50	3	35	9	30	3704
USMIN06	Les Usages	Allogny	0.05	0.15	9.5	13.54	0.26	0.85	0.07	0.09	34.93	72	131	9	401	154	61	42	53	92	12	1	3	1	7	158	33	149	9	40	10	2	11	2	11	2	6	ND	5	ND	3	ND	2	61	ND	22	6	19	3980
USMIN07	Les Usages	Allogny	0.04	0.19	8.85	11.57	0.35	0.8	0.05	0.06	38.58	47	181	16	719	457	58	42	47	127	13	2	5	3	6	132	32	70	8	35	9	2	9	2	11	2	6	ND	6	ND	4	ND	2	78	2	28	10	33	3581
USMIN08	Les Usages	Allogny	0.08	0.19	9.59	13.01	0.31	1.12	0.08	0.05	35.17	21	122	14	396	175	84	50	62	141	13	ND	7	1	9	201	35	71	8	36	8	2	10	2	12	3	7	1	7	1	4	ND	2	28	ND	17	7	25	4390
USMIN091	Les Usages	Allogny	0.03	0.17	9.79	12.57	0.43	0.86	0.04	1.88	33.77	1727	397	14	400	281	60	113	64	142	11	9	4	2	6	2090	40	224	12	54	14	4	16	3	18	3	9	1	9	1	4	ND	5	418	6	50	10	34	3474
USMIN092	Les Usages	Allogny	0.09	0.16	9.86	12.89	0.36	0.92	0.05	0.04	35.29	21	130	6	371	182	67	47	61	116	11	ND	4	ND	7	169	37	79	10	44	12	3	14	3	17	3	9	1	9	1	4	ND	2	47	ND	28	7	29	3420
USMIN10	Les Usages	Allogny	0.05	0.14	7.93	11.04	0.81	0.91	0.11	0.07	39.85	22	126	14	383	216	66	131	68	147	10	ND	4	1	7	182	52	131	17	81	20	5	20	3	19	4	9	1	9	1	3	ND	2	43	ND	25	8	29	3363
USMIN11	Les Usages	Allogny	0.05	0.2	8.5	11.89	0.7	0.86	0.21	0.07	37.87	23	91	21	416	231	71	66	69	141	15	2	4	2	8	162	32	88	9	43	12	3	14	3	18	4	11	2	12	2	4	ND	2	81	ND	14	10	25	3403
US 1101 MIN	Les Usages	Allogny	0.09	0.14	2.98	9.62	0.71	0.71	0.1	0.73	48.33	25	51	7	200	995	49	138	73	50	5	3	4	2	5	262	21	80	7	30	9	2	10	2	12	3	7	1	7	1	1	ND	4	154	ND	11	10	19	1212
US 1102 MIN	Les Usages	Allogny	0.04	0.15	8.98	12.34	0.28	0.88	0.08	0.08	37.43	22	114	11	296	137	62	74	58	113	12	ND	5	2	8	181	51	123	15	64	16	4	16	3	16	3	8	1	7	1	3	ND	3	76	2	36	7	25	3450
US 1103 MIN	Les Usages	Allogny	0.05	0.15	7.65	11.26	0.29	0.88	0.09	0.13	40.8	45	123	10	381	285	64	98	54	120	12	2	5	2	8	154	45	119	13	55	13	3	13	2	12	2	6	ND	6	ND	4	ND	4	131	4	45	7	19	2330
US 1104 MIN	Les Usages	Allogny	0.06	0.15	6.9	9.86	0.76	0.92	0.28	0.07	42.9	30	136	11	376	232	67	466	64	117	10	1	4	1	7	358	82	365	32	142	33	8	28	4	21	4	9	1	8	1	3	ND	3	75	1	27	9	28	2453
BL 0011 MIN	Bleron	Allogny	0.04	0.46	0.71	2.88	1.39	ND	2.11	1.5	58.21	17	52	4	63	31	23	33	6	10	1	ND	4	ND	3	76	8	15	1	7	2	ND	1	ND	1	ND	ND	ND	ND	ND	ND	ND	ND	49	ND	1	5	3	312
US 1214 MIN	Les Usages	Allogny	0.1	0.2	10.48	15.73	0.24	0.01	0.18	0.14	30.82	83	143	15	409	204	107	144	56	103	15	ND	7	1	11	274	42	115	11	46	10	3	12	2	14	3	7	1	7	ND	4	ND	3	92	1	29	9	14	3612
BL-B-MIN-01	Bleron	Allogny	0.15	0.26	0.6	3.36	0.5	0.42	0.5	0.96	61.06	11	20	3	84	26	33	22	10	11	1	ND	2	ND	3	100	7	17	2	7	2	ND	2	ND	2	ND	ND	ND	ND	ND	ND	ND	1	70	ND	ND	4	4	312
BL-B-MIN-02	Bleron	Allogny	0.03	1.64	1.61	4.88	0.29	0.42	33.95	0.28	24.11	55	87	5	264	186	29	109	11	26	2	1	3	1	2	77	13	21	3	10	2	ND	2	ND	2	ND	1	ND	1	ND	ND	ND	ND	45	ND	2	5	7	582
BL-B-MIN-03	Bleron	Allogny	0.05	0.74	1.01	5.67	0.39	0.36	0.89	1.18	56.2	35	55	11	173	59	17	15	3	10	2	ND	2	ND	ND	90	6	15	2	6	ND	ND	ND	ND	ND	ND	ND	ND	ND	ND	ND	ND	ND	27	ND	1	4	2	812
FA810A	Beaume	Nozières	0.18	0.28	3.13	9.12	0.93	1.52	0.11	3.26	45.47	269	441	24	740	38	89	28	22	27	4	7	3	ND	9	79	32	51	7	31	6	1	5	ND	5	ND	2	ND	2	ND	ND	ND	ND	26	ND	8	8	6	1422
FA810B	Beaume	Nozières	0.06	0.42	4.9	15.61	1.1	2.82	0.17	1.48	33.27	545	447	45	1630	45	104	52	82	47	7	8	5	2	9	286	37	103	9	38	8	2	9	2	15	4	12	3	14	2	2	ND	1	101	ND	11	12	18	2449
FA810C	Beaume	Nozières	0.29	0.24	2.11	7.34	1.05	1.96	0.17	8.86	43.58	855	784	29	2005	43	72	102	34	21	2	8	3	ND	8	271	50	222	13	54	10	2	8	1	8	2	4	ND	4	ND	ND	ND	ND	48	ND	6	9	13	1011
LN MIN zone1 sect0	Les Nounins	Nozières	ND	0.03	0.36	32.56	0.18	0.08	0.37	3.38	16.52	434	195	5	806	3	1	37	32	4	1	1	2	ND	ND	2558	24	184	7	35	8	2	10	1	8	1	3	ND	3	ND	ND	ND	ND	8	ND	ND	2	2	487
LN MIN zone1 sect3 A	Les Nounins	Nozières	0.46	0.1	0.84	27.38	0.13	0.56	0.44	6.03	20.11	1067	515	34	859	51	40	210	72	8	2	5	2	3	8	3144	213	94	36	160	26	5	22	3	13	2	6	ND	4	ND	ND	ND	ND	19	ND	1	2	6	454
LN MIN zone1 sect3 B	Les Nounins	Nozières	0.03	0.07	0.76	33.6	0.08	0.12	0.06	0.44	17.68	176	359	10	427	7	5	3	8	8	1	ND	2	ND	ND	69	6	16	2	6	2	ND	1	ND	2	ND	ND	ND	ND	ND	ND	ND	ND	9	ND	ND	ND	4	516
PAST 810	Beaume	Nozières	0.02	0.38	4.53	15.71	1.05	2.64	0.2	3.5	32.14	594	473	42	1501	54	107	70	36	57	7	9	4	3	9	240	41	107	9	38	7	2	6	1	7	1	4	ND	4	ND	2	ND	103	58	ND	8	10	15	1998
PE A SOND4	Petit Plaix	Nozières	ND	0.18	2.46	15.82	0.71	0.59	0.37	0.95	39.31	1212	1933	57	29	476	20	12	194	77	5	9	11	9	2	86	52	73	11	57	14	4	29	5	29	7	18	2	15	2	2	ND	6	2	ND	5	4	8	1452
PE B SOND4	Petit Plaix	Nozières	0.05	1.04	7.43	23.58	0.18	2.94	3.91	2.16	14.36	7	ND	16	89	1	113	140	77	230	14	ND	5	ND	9	415	68	179	14	63	12	3	12	2	11	2	6	ND	6	ND	7	1	ND	7	ND	14	9	18	3873
PE SOND1	Petit Plaix	Nozières	0.16	0.72	3.33	16.43	0.34	1.29	1.89	1.42	34.79	314	100	17	28	7	42	70	25	143	8	1	4	ND	3	236	29	50	7	29	5	1	5	ND	4	ND	2	ND	3	ND	4	ND	2	4	ND	7	3	8	2136
PAST 755	St-Palais	ND	0.01	0.09	1.41	6.06	0.28	0.25	0.1	0.74	57.25	59	132	27	315	180	23	10	23	21	3	3	3	ND	3	40	18	66	4	17	4	ND	4	ND	4	ND	2	ND	3	ND	ND	ND	417	26	ND	2	5	11	563
PAST 758	St Eloy de Gy	ND	0.04	0.08	1.61	4.62	0.38	0.3	0.08	0.18	59.46	41	67	9	297	184	24	24	24	48	2	2	3	ND	4	31	13	45	4	19	5	1	5	ND	6	1	3	ND	3	ND	ND	ND	215	29	ND	6	2	12	581
BA0019 MIN	Barbotzies	Allogny	0.04	0.16	15.13	29.47	0.13	1.32	0.1	0.03	2.79	13	58	12	202	106	94	61	40	1829	25	ND	7	2	8	432	144	218	35	135	23	4	15	2	11	2	6	ND	8	1	62	2	4	64	3	58	9	25	8544
BA0020 MIN	Barbotzies	Allogny	0.11	0.21	10.83	17.12	0.36	0.82	0.13	0.53	26.54	112	133	31	496	157	59	95	41	613	25	ND	7	3	5	269	77	148	23	91	20	5	16	2	14	3	6	ND	7	1	21	2	3	100	2	65	16	32	7867
BA0021 MIN	Barbotzies	Allogny	0.04	0.07	3.51	29.54	0.19	0.27	0.08	0.11	19.85	53	93	33	438	87	20	24	33	75	8	1	4	1	3	97	28	107	15	80	21	4	14	2	13	2	6	ND	6	1	4	ND	1	140	3	78	18	19	1505
PAST 807	Les Nounins	Nozières	0.1	0.17	1.96	20.31	0.33	1.42	0.86	1.29	32.26	1900	719	92	39	26	65	39	69	101	8	3	3	1	4	472	42	79	11	48	10	3	11	2	9	2	5	ND	5	ND	3	1	424	9	ND	6	3	4	1599
PAST 808	Les Nounins	Nozières	0.18	0.42	4.08	28.05	0.07	1.44	1.81	14.07	5.32	234	64	ND	80	8	92	208	1481	61	9	1	3	ND	9	1419	265	372	74	432	118	33	193	29	171	38	97	12	69	10	2	ND	423	12	ND	8	6	13	2133
PAST 984	Petits Champs	Nozières	0.27	0.27	2.69	21.85	0.47	1.25	1.72	1.57	27.78	117	25	73	44	6	65	76	100	119	10	ND	4	ND	5	728	87	180	20	83	18	4	17	3	15	3	7	ND	6	ND	3	ND	258	14	ND	9	5	5	1891
PAST 987	Les Nounins	Nozières	0.07	0.33	3.78	24.1	0.31	1.64	1.01	2.4	22.91	213	93	18	171	7	72	98	147	57	9	1	3	ND	8	609	101	181	20	85	17	5	18	3	18	4	10	1	8	1	2	ND	354	15	ND	7	10	9	2020
PAST 988	Les Rougeaux	Nozières	0.48	0.25	1.69	18.29	0.18	1.24	2.25	6.47	29.51	278	15	31	15	4	58	96	314	55	5	ND	2	ND	5	4466	249	590	91	362	76	19	63	10	58	11	27	3	22	3	1	ND	371	4	ND	4	9	3	922
PAST 405	Nohant En Gracay	ND	0.1	0.22	0.99	12.03	0.39	0.43	0.79	0.13	48.16	135	93	61	7	300	24	25	12	98	3	6	5	2	ND	223	9	22	2	9	2	ND	2	ND	2	ND	1	ND	1	ND	3	ND	379	ND	ND	3	1	4	900
BL-C-24-01	Bleron	Allogny	0.01	0.29	3.69	33.81	0.22	0.83	0.67	0.59	11.52	6	4	ND	8	3	42	59	28	224	9	ND	2	ND	2	256	32	81	8	36	8	2	7	1	6	1	3	ND	3	ND	6	ND	1	ND	ND	14	4	13	2180
PA0103	Le Parc	Allogny	0.06	0.11	1.95	40.72	0.11	0.22	0.43	0.08	5	4	3	ND	35	2	9	254	14	199	5	ND	4	ND	ND	136	99	182	16	55	8	1	5	ND	3	ND	2	ND	2	ND	6	ND	ND	8	ND	13	3	12	1825
COUL1a	Coulanges	AUBOIS	0.03	0.65	10.72	20.66	0	0.64	22.76	0.22	0.11	ND	ND	ND	1	3	26	503	166	478	7	ND	ND	ND	1	277	102	236	25	103	25	6	22	4	24	5	14	2	14	2	10	ND	ND	ND	ND	31	9	ND	5688
COUL2a	Coulanges	AUBOIS	0.05	0.6	14.23	18.19	0	1.11	20.86	0.33	0.28	ND	ND	ND	4	3	56	456	219	553	10	ND	ND	ND	3	504	137	298	33	133	31	8	28	5	31	6	18	3	18	2	12	1	ND	ND	ND	40	13	ND	7563
COUL3a	Coulanges	AUBOIS	0.05	0.59	11.35	19.77	0.01	0.97	21.6	0.32	1.22	ND	ND	ND	3	3	44	447	192	541	14	ND	2	ND	3	288	114	261	27	111	26	6	24	4	26	5	15	2	15	2	11	1	ND	ND	ND	34	11	ND	6797
COUL4a	Coulanges	AUBOIS	0.05	0.57	12.64	20.57	0	1.1	18.47	0.26	1.24	ND	ND	8	3	5	46	388	260	635	11	ND	ND	ND	3	291	157	278	37	154	36	9	34	6	36	8	21	3	21	3	15	1	ND	ND	ND	41	11	ND	7711
FNAY1a	le Fournay	AUBOIS	0.05	0.52	10.39	23.84	0	1.14	17.57	0.24	0.35	ND	1	11	2	2	61	368	151	620	12	ND	ND	ND	4	242	85	192	20	83	20	5	18	3	21	4	12	2	12	2	14	1	ND	ND	ND	31	11	ND	7427
FNAY2a	le Fournay	AUBOIS	0.05	0.57	12.94	18.71	0.01	0.95	21.05	0.23	1.33	ND	ND	2	25	2	51	410	165	519	13	ND	ND	ND	4	360	101	419	25	103	25	6	22	4	25	5	14	2	15	2	11	1	ND	ND	ND	36	12	ND	7032
FNAY3a	le Fournay	AUBOIS	0.04	0.59	14.88	17.36	0	0.71	20.69	0.26	1.09	ND	ND	ND	13	3	31	412	245	643	15	ND	ND	ND	2	343	137	287	32	129	31	8	29	5	32	7	19	3	19	3	13	1	ND	ND	ND	46	15	ND	8518
FNAY4a	le Fournay	AUBOIS	0.05	0.59	13.83	18.95	0	1.1	19.87	0.22	0.71	ND	ND	ND	4	3	56	371	199	610	13	ND	ND	ND	4	245	124	274	27	109	26	6	24	4	26	6	16	2	15	2	13	1	ND	ND	ND	43	14	ND	7921
PRECY1a	Précy	AUBOIS	0.05	0.62	10.84	20.27	0	0.91	22.52	0.35	0.42	ND	ND	ND	3	3	47	301	166	592	7	ND	ND	ND	2	444	103	291	26	106	25	6	22	4	24	5	14	2	14	2	14	ND	ND	ND	ND	32	12	ND	6061
PRECY2a	Précy	AUBOIS	0.04	0.58	9.99	19.07	0.01	0.64	25.63	0.29	0.55	ND	ND	ND	5	2	31	322	164	564	12	ND	ND	ND	2	337	98	254	25	101	24	6	21	4	23	5	14	2	14	2	13	1	ND	7	ND	29	10	ND	6245
PRECY3a	Précy	AUBOIS	0.05	0.59	10.61	19.51	0	1	24.35	0.25	0.17	ND	ND	ND	6	2	53	321	162	602	5	ND	ND	ND	3	348	98	267	25	102	24	6	21	4	23	5	14	2	14	2	13	ND	ND	ND	ND	30	11	ND	5608
PRECY4a	Précy	AUBOIS	0.04	0.61	10.49	18.96	0	0.68	25.62	0.25	0.16	ND	ND	ND	2	2	33	333	163	587	4	ND	ND	ND	2	372	97	268	25	101	24	6	21	4	23	5	14	2	14	2	13	ND	ND	ND	ND	30	11	ND	5649
RAV1a	Raveau	AUBOIS	0.08	0.47	11.93	22.58	0	1.15	16.3	0.83	0.76	ND	ND	1	4	2	68	203	132	688	15	ND	ND	ND	6	707	102	384	23	94	21	5	18	3	18	4	11	2	11	2	16	1	ND	ND	ND	31	9	ND	8594
RAV2a	Raveau	AUBOIS	0.08	0.48	11.93	22.67	0	1.13	16.17	0.83	0.74	ND	ND	1	4	2	68	203	131	692	15	ND	ND	5	6	713	104	386	23	94	20	5	18	3	18	4	11	2	11	2	17	1	ND	ND	ND	31	9	ND	8709
RAV3a	Raveau	AUBOIS	0.06	0.6	9.58	19.7	0	1	24.64	0.6	0.32	ND	ND	ND	2	2	53	271	121	640	10	ND	ND	ND	5	558	92	356	21	85	18	4	16	3	16	4	10	1	10	1	15	1	ND	4	ND	24	8	ND	8182
RAV4a	Raveau	AUBOIS	0.06	0.54	11.4	19.77	0	0.95	22.16	0.52	0.32	ND	ND	ND	5	3	45	233	144	772	12	ND	2	2	6	555	112	356	25	103	22	5	19	3	20	4	12	2	11	2	18	1	ND	ND	ND	30	10	ND	8906
[truncated: 2 more columns]

## Sheet: salg inclusions
Slag inclusion	Sample	Y (ppm)	Nb (ppm)	La (ppm)	Ce (ppm)	Pr (ppm)	Nd (ppm)	Sm (ppm)	Eu (ppm)	Gd (ppm)	Tb (ppm)	Yb (ppm)	Hf (ppm)	Th (ppm)	U (ppm)
CH1N34 10	CH1N34	214.363	4.81814	20.4452	80.373	6.68455	53.1352	31.433	8.3142	46.938	6.99387	16.5715	2.7837	5.15679	10.3375
CH1N34 11	CH1N34	277.338	5.96017	29.1031	95.0842	9.58496	75.874	41.7013	10.7355	61.4282	9.37968	22.4799	3.19175	6.90684	14.3921
CH1N34 2	CH1N34	216.006	4.73313	16.2593	56.8587	6.7046	59.0685	35.3491	9.52335	50.8212	8.02614	20.2734	2.31744	4.11787	11.7827
CH1N34 3	CH1N34	245.5	5.45507	18.9231	65.2687	7.80038	69.2301	39.8065	10.8598	59.208	9.25566	22.6604	2.81822	4.75818	15.5116
CH1N34 4	CH1N34	234.291	5.61555	21.1463	73.4518	7.84797	66.0187	37.6301	10.4091	53.8525	8.54238	20.2379	2.68854	5.33647	13.6245
CH1N34 5	CH1N34	234.959	5.96856	23.4757	75.9922	8.28704	67.3098	36.5297	10.1949	52.6817	8.33915	19.3569	2.94839	6.02549	12.2969
CH1N34 6	CH1N34	273.129	5.9576	24.3653	83.9152	9.2127	76.6179	43.9596	11.9376	64.2263	10.0089	23.7282	2.99001	5.89684	14.1864
CH1N34 7	CH1N34	238.131	5.64533	21.4939	78.5015	8.60882	59.2963	34.2486	9.32043	50.9803	7.87899	19.1263	3.32738	5.52711	13.0479
CH1N34 8	CH1N34	296.081	6.86432	29.6605	98.902	10.248	83.0022	46.9101	12.7327	67.25	10.5561	23.6334	3.12188	7.03624	15.7086
CH1N34 9	CH1N34	224.648	6.41484	31.8025	73.4983	7.85923	60.0997	32.7516	8.39674	47.4006	7.81294	18.4017	3.71769	6.68885	11.4719
CH1N35 1	CH1N35	383.881	5.44048	19.1186	61.2381	8.83412	87.5559	55.9717	14.4982	84.7325	13.0651	31.1685	3.02669	5.27811	13.1109
CH1N35 10	CH1N35	398.609	6.02144	27.7222	85.9467	10.6083	96.812	55.6206	14.7807	84.0326	13.3857	29.1493	3.13383	6.9103	17.8683
CH1N35 11	CH1N35	401.654	5.93944	25.9533	82.4166	12.5884	93.2903	56.6737	15.4869	83.9974	13.6601	29.6956	3.67931	6.78283	17.581
CH1N35 12	CH1N35	408.463	6.02181	25.493	83.573	10.3901	94.0644	54.6618	14.1875	85.9249	13.4444	27.8426	3.42967	7.01138	18.2364
CH1N35 2	CH1N35	339.345	5.05848	17.0008	56.3866	8.1614	80.3752	49.2959	13.1182	75.725	12.1683	28.511	2.82141	4.58782	14.554
CH1N35 3	CH1N35	356.938	6.3864	18.3873	62.1657	8.79155	87.0538	52.4607	14.5823	80.8616	12.7256	29.737	2.9036	4.92027	14.837
CH1N35 4	CH1N35	349.738	5.41624	20.9983	69.6421	8.89639	85.7421	50.0316	13.0203	75.8149	11.9509	27.4135	2.71743	5.28231	0.0512805
CH1N35 5	CH1N35	351.904	5.03138	20.5735	64.9574	8.14722	76.7349	46.4661	12.0008	71.4367	11.1814	27.5292	2.23825	5.14425	14.1075
CH1N35 6	CH1N35	339.614	5.04239	20.0239	66.9169	8.56398	79.6198	45.8846	12.1755	68.9463	10.9341	24.1753	2.34306	4.71369	14.1761
CH1N35 7	CH1N35	358.036	6.24258	26.1159	83.6508	10.3086	93.945	50.5332	13.8421	74.7412	12.3085	26.3698	2.87707	6.30439	17.3256
CH1N35 8	CH1N35	363.757	6.00592	23.1769	73.0387	9.19263	83.5256	50.5413	12.8237	74.7777	12.0165	26.4598	3.27518	6.35449	16.0478
CH1N35 9	CH1N35	395.207	6.08885	25.9461	80.1494	10.1864	94.8676	54.7039	13.863	82.036	13.1632	28.5262	3.22405	6.52002	16.8053
CH1N36 1	CH1N36	692.483	2.99542	36.2532	112.114	15.9526	166.727	101.937	32.3425	137.178	24.8934	65.771	5.43436	9.48177	26.6542
CH1N36 2	CH1N36	696.278	1.26135	37.2407	117.098	16.3554	168.809	104.72	31.8751	140.126	25.4253	64.5639	6.04686	10.4925	25.8174
CH1N36 4	CH1N36	686.889	1.2739	43.9798	141.163	18.8102	179.961	102.939	30.7929	130.405	24.6595	60.7659	5.8064	11.9828	30.7243
CH1N36 5	CH1N36	580.465	8.44644	35.9172	111.154	15.0711	150.602	86.0393	22.5365	105.104	19.8053	45.7122	5.83705	9.71415	21.1622
CH1N36 6	CH1N36	626.874	1.53306	39.3605	128.047	16.8755	160.934	94.1767	26.6476	115.403	21.2263	50.9459	5.33695	10.6491	26.4051
CH1N36 7	CH1N36	551.124	8.72478	40.6256	122.737	16.3749	151.371	82.36	23.092	98.439	19.1005	44.9759	4.6179	10.4494	22.9478
CH1N36 8	CH1N36	609.929	7.66047	39.1873	106.652	15.7403	156.967	92.7006	25.0078	106.85	20.9671	57.6213	4.79263	9.89027	16.0912
CH1N40 1	CH1N40	486.568	7.51425	33.9656	119.725	9.87977	77.5556	57.9667	17.0446	101.884	15.0123	33.2689	3.89891	9.17723	17.8084
CH1N40 2	CH1N40	492.556	6.53657	32.667	120.595	9.92454	76.2789	56.1893	17.388	103.69	15.5664	31.5744	2.97415	7.87995	17.8119
CH1N40 3	CH1N40	397.216	4.77692	23.3996	81.0465	7.10097	57.3947	45.8442	11.7522	83.397	12.0975	29.4064	3.57867	4.93842	12.249
CH1N40 4	CH1N40	515.957	8.48789	37.7492	127.965	10.4855	85.5118	63.3537	18.6655	111.678	16.5323	34.6366	4.18784	9.54313	20.2191
CH1N40 5	CH1N40	596.634	8.244	39.484	148.658	11.6259	94.2799	71.3703	23.0134	140.052	20.1135	42.2456	3.72541	11.4031	24.155
CH1N40 6	CH1N40	536.668	7.87953	36.9974	135.589	10.6456	87.3425	65.7515	19.2939	125.953	17.9953	36.9663	3.73817	9.37661	21.6034
CH1S65 1	CH1S65	64.787	10.3897	53.09	122.249	15.9284	81.7777	20.468	4.49663	27.2941	3.34752	8.61243	5.21769	26.1926	6.53159
CH1S65 10	CH1S65	84.6143	11.4222	64.0935	153.377	18.1219	88.9977	22.4079	4.75431	19.4728	3.79062	11.2627	6.01018	32.698	13.2626
CH1S65 11	CH1S65	73.7597	11.3254	58.2261	140.376	16.5923	81.8584	19.8809	4.39132	18.3063	3.46117	9.62802	5.63871	28.3295	12.8534
CH1S65 12	CH1S65	83.4181	12.1863	65.0467	153.635	17.8778	90.1205	21.9036	4.77213	18.8718	3.73659	10.8623	6.35406	32.4109	13.8566
CH1S65 2	CH1S65	66.5531	10.7363	55.102	125.297	16.3724	83.0843	20.1267	4.55129	28.0093	3.47421	8.70232	5.35982	27.3308	7.00561
CH1S65 3	CH1S65	52.9969	8.77204	44.071	96.4627	12.408	65.5086	15.4597	3.4679	21.6409	2.58292	6.64528	4.80619	21.9772	5.02375
CH1S65 4	CH1S65	63.5767	10.9986	59.4517	138.654	16.7522	82.676	19.1829	4.26468	20.9972	3.09394	8.14773	5.31726	29.0787	7.43312
CH1S65 5	CH1S65	58.6277	10.0624	55.0842	123.951	15.3015	74.6412	17.196	3.94656	19.1068	2.72523	7.18175	5.56875	27.0611	6.84524
CH1S65 6	CH1S65	55.9003	9.50905	53.2912	118.481	14.7521	71.737	17.2168	3.70216	18.305	2.76566	6.79463	4.77543	24.8586	6.20762
CH1S65 7	CH1S65	62.6794	11.1577	62.7419	145.756	17.3215	82.6959	18.4178	3.80187	17.2323	2.88265	7.58365	5.24556	30.4712	7.59563
CH1S65 8	CH1S65	72.3195	10.9143	55.5623	131.185	16.113	81.8088	19.4294	4.20787	18.5837	3.41476	9.79739	5.27117	26.1106	11.7534
CH1S65 9	CH1S65	77.5707	9.53516	53.5627	123.055	15.0406	75.0645	20.349	4.44151	18.665	3.89356	9.60687	5.44079	29.7137	11.3098
CH1S66 1	CH1S66	410.119	6.25447	24.6151	69.2793	13.3018	133.738	69.6862	19.4434	74.6976	16.1325	37.1407	3.33542	5.69325	15.497
CH1S66 10	CH1S66	359.243	6.41616	31.8055	80.6469	15.3395	128.854	62.5585	15.002	55.1063	12.9512	28.83	3.65837	6.69985	15.7376
CH1S66 11	CH1S66	379.524	6.32823	35.3129	93.5722	17.8104	149.742	71.5323	17.3695	62.3055	13.9209	31.6807	4.12855	7.51434	17.9463
CH1S66 12	CH1S66	373.302	6.44039	34.6494	89.1062	16.9416	142.284	66.3836	16.298	58.5169	13.6159	29.9293	3.75989	6.8446	16.7745
CH1S66 2	CH1S66	376.061	6.16932	27.1563	71.2835	14.9735	142.95	70.1166	19.1348	75.1536	15.4769	36.584	3.85566	5.89893	14.9801
CH1S66 3	CH1S66	480.258	6.33476	26.8702	76.3209	14.6373	151.559	79.5882	22.401	85.3769	18.59	43.2513	3.39969	5.95384	16.5145
CH1S66 4	CH1S66	374.62	5.91034	26.1768	74.4196	12.8556	123.424	64.8451	17.0061	64.0037	14.1689	32.1976	3.2792	6.03732	16.2512
CH1S66 5	CH1S66	353.688	5.75103	26.8127	73.4618	14.0673	130.445	63.7734	16.6304	60.5673	13.5238	31.2756	3.10836	5.41425	14.1397
CH1S66 6	CH1S66	391.871	6.34491	29.2403	80.8581	15.2341	140.435	72.2435	18.5305	67.3089	14.7301	33.8175	3.53272	6.09434	16.4656
CH1S66 7	CH1S66	365.313	5.83731	31.629	83.2532	16.5647	143.681	68.2398	16.8968	62.386	13.7532	31.6216	3.44736	6.65244	16.1123
CH1S66 8	CH1S66	389.511	5.97687	30.0736	84.3731	13.8516	124.458	64.5903	16.571	61.0099	14.0064	31.2698	3.34195	6.74557	16.5233
CH1S66 9	CH1S66	410.108	7.44716	34.6477	88.3811	17.7407	155.682	75.221	18.1033	66.1274	15.044	32.2911	4.31869	7.57316	16.879
CH1S67 1	CH1S67	41.5034	5.743	25.8016	58.5738	7.34031	40.0681	10.9248	2.49239	15.8672	2.02819	6.03225	3.79773	14.4812	5.37373
CH1S67 10	CH1S67	37.2589	5.65528	29.9188	66.3882	7.60713	37.3149	9.59126	2.05896	8.52604	1.62146	4.80507	3.41456	16.0274	5.27771
CH1S67 11	CH1S67	34.1458	5.17377	27.4961	59.7277	6.8408	33.7974	8.49305	1.84643	7.31181	1.4797	4.49919	3.16663	13.4698	5.25661
CH1S67 12	CH1S67	39.5049	5.53192	31.6305	69.3827	7.84425	39.432	9.54747	2.06297	8.6871	1.63342	4.95791	3.40078	16.0702	5.43975
CH1S67 2	CH1S67	46.5486	6.31046	28.2734	64.2307	8.09726	44.8956	11.5501	2.76799	16.6468	2.22906	6.95267	3.74351	15.7564	6.01357
CH1S67 3	CH1S67	300.745	4.50844	17.5477	92.2945	8.02237	81.3248	52.6857	15.4147	59.8588	12.0363	31.0507	2.77591	5.1839	22.1763
CH1S67 4	CH1S67	299.649	4.1983	18.8863	88.1935	7.99038	77.2214	47.8154	13.5228	52.9914	11.3684	28.3658	2.5349	5.17658	23.8017
CH1S67 5	CH1S67	46.3142	5.3175	26.3974	60.9872	7.26744	38.0552	10.7427	2.56829	11.9653	2.02777	5.88343	3.34732	13.4145	5.40679
CH1S67 6	CH1S67	43.5562	6.22678	31.2743	72.0766	8.67748	44.9172	11.6018	2.60399	12.7287	2.0141	6.06371	3.36756	16.8053	6.35237
CH1S67 7	CH1S67	40.0603	5.52037	30.4968	67.0174	7.85055	39.6554	9.89907	2.21237	9.84326	1.81674	5.20787	3.50064	15.7941	5.50844
CH1S67 8	CH1S67	32.5327	5.04221	22.8095	54.1457	6.11129	31.0585	8.21441	1.64387	7.60368	1.37716	4.28724	3.14031	11.6506	4.5746
CH1S67 9	CH1S67	21.0317	1.03042	37.1511	58.6257	3.77217	18.8201	4.67957	1.07434	5.47707	1.34117	3.63197	0.447153	5.6495	30.87
CH1S68 1	CH1S68	80.7195	9.8601	50.1093	110.104	15.9728	86.8623	21.3189	4.902	28.077	3.99385	10.8921	5.06171	25.5442	10.6378
CH1S68 10	CH1S68	93.4395	10.8596	68.2474	153.045	19.9303	101.241	24.0714	5.15303	21.4029	4.09081	11.9395	5.84637	33.7156	13.7285
CH1S68 11	CH1S68	87.9029	10.1148	59.6177	135.699	17.6494	91.2806	22.0906	4.59631	18.73	3.77839	11.6936	5.75524	30.3702	12.2578
CH1S68 12	CH1S68	89.9343	10.7754	65.174	145.588	19.2095	96.7587	23.5563	4.97962	20.1323	4.06925	11.9582	5.94439	31.0172	13.1285
CH1S68 2	CH1S68	78.0366	10.3384	50.2149	112.138	16.282	88.4915	23.0098	4.98839	27.6255	3.93324	10.9104	4.84792	24.7565	10.9765
CH1S68 3	CH1S68	92.5067	10.891	57.8341	124.277	18.3999	100.42	26.0369	5.68918	32.259	4.58956	12.6686	5.964	30.2143	12.3182
CH1S68 4	CH1S68	88.5672	10.9122	61.4593	134.929	18.7196	100.059	24.6888	5.30496	25.6247	4.19688	12.1581	5.74888	32.0363	12.8146
CH1S68 5	CH1S68	87.2294	10.6808	56.8647	136.183	17.6979	93.2787	23.2314	5.05715	23.4446	3.99661	11.2191	5.4616	28.058	12.4851
CH1S68 6	CH1S68	77.959	9.57794	52.7734	116.787	16.3338	86.9112	21.1888	4.5462	21.4073	3.57918	10.4531	4.69829	25.5592	10.9833
CH1S68 7	CH1S68	104.013	12.7452	75.6845	169.928	22.3511	115.697	28.1412	6.02877	25.8999	4.68018	13.0093	6.74876	39.6736	15.6015
CH1S68 8	CH1S68	102.398	12.7181	75.4358	176.541	22.1427	114.571	28.453	5.9881	25.1282	4.70133	12.8272	6.76165	38.5652	15.6969
CH1S68 9	CH1S68	78.3887	10.2995	56.0138	127.162	16.8972	89.2665	20.7578	4.56267	18.4802	3.54163	10.1891	4.94605	27.6931	11.7572
CH1S69 1	CH1S69	55.3314	6.86452	41.5335	92.7671	12.7423	68.5534	16.6525	3.60838	19.3924	2.68398	7.81829	4.21214	20.4285	8.28208
CH1S69 10	CH1S69	57.1605	6.84884	49.5833	109.407	14.4906	71.6225	17.2541	3.98931	16.177	2.79977	8.01944	3.77435	23.353	8.57877
CH1S69 11	CH1S69	57.8569	7.51794	47.9831	108.918	14.2674	71.9732	17.2172	3.75342	16.27	2.72804	7.46894	4.19584	23.3271	8.94849
CH1S69 12	CH1S69	56.1846	7.05305	45.9845	101.864	13.6888	69.1875	17.1378	3.38873	15.0917	2.54185	7.70597	4.32287	22.1239	7.9466
CH1S69 2	CH1S69	50.7432	6.01956	37.5047	83.6353	11.8276	61.41	15.0889	3.2205	17.7051	2.49999	7.51766	3.59703	17.1266	6.7216
CH1S69 3	CH1S69	47.2493	5.43485	34.7404	78.2349	11.4033	59.6826	14.5178	3.11601	17.518	2.31805	7.10058	3.20485	14.0308	5.81314
CH1S69 4	CH1S69	51.2956	7.52823	43.5584	101.997	13.483	66.7711	16.2413	3.39819	15.811	2.46731	7.7049	4.00861	20.532	8.87743
CH1S69 5	CH1S69	51.694	7.00445	42.2663	98.7003	12.8316	66.9277	15.7731	3.21303	15.6556	2.42453	6.92512	3.86907	19.2943	8.21966
CH1S69 6	CH1S69	56.7212	7.28338	48.3739	109.595	15.3682	73.6935	17.1388	3.68665	17.2991	2.77615	7.78001	4.13224	23.0788	9.42412
CH1S69 7	CH1S69	54.7003	7.33888	48.3204	106.722	14.2382	70.6008	16.7003	3.4406	15.0928	2.56392	7.22051	3.84983	22.8358	8.7839
CH1S69 8	CH1S69	53.1827	7.15336	46.3219	112.382	13.1347	67.9973	16.3595	3.28147	13.963	2.48799	7.01063	4.32335	21.197	8.57253
CH1S69 9	CH1S69	49.7762	6.69527	43.9951	98.8282	12.9799	65.4882	15.7247	3.11449	13.2191	2.29974	7.15535	3.53161	19.4577	7.86874
CH1S70 2	CH1S70	16.214	2.66602	12.144	25.2318	3.32377	17.4971	4.31442	0.862953	4.84404	0.649532	1.89635	2.02227	5.46913	1.89781
CH1S70 3	CH1S70	6.83349	2.05827	6.43476	10.724	1.6092	7.27763	1.57763	0.317073	1.91599	0.241709	0.708776	1.29524	2.37315	0.488505
CH1S70 4	CH1S70	45.4733	3.26548	29.6829	70.3761	8.88934	45.9379	11.4248	2.42541	10.7401	1.78514	5.04704	2.82639	15.4308	6.70525
CH1S70 5	CH1S70	6.17397	2.20032	6.41045	11.7351	1.42637	6.07874	1.18708	0.251096	1.08968	0.184402	0.64578	1.60051	2.63709	0.399225
CH2N27 1	CH2N27	171.47	11.7912	94.9314	227.27	27.9595	131.769	30.5422	6.54415	30.5791	5.03764	16.1555	5.66577	38.4797	10.9628
CH2N27 10	CH2N27	182.512	12.4426	103.53	244.905	29.9989	139.527	32.7228	7.68575	32.9592	5.8505	17.5004	6.46895	43.6673	11.8875
CH2N27 11	CH2N27	151.411	9.95056	83.5823	203.8	25.1708	114.509	27.4091	5.93788	25.3868	4.6172	15.0002	4.6841	32.0801	9.266
CH2N27 12	CH2N27	174.814	10.5964	101.423	232.954	28.9336	134.002	31.9367	6.43957	30.9359	5.52788	17.6718	7.03868	40.6592	11.1813
CH2N27 2	CH2N27	166.139	10.3703	90.8244	211.268	26.1783	122.843	28.2222	6.20604	28.6672	5.26243	15.73	5.41111	37.1881	9.87165
CH2N27 3	CH2N27	160.737	10.1789	88.3406	206.047	26.1715	120.054	28.1314	6.35112	26.3957	5.26758	15.4096	5.00482	33.865	9.74487
CH2N27 4	CH2N27	129.083	8.65353	65.0599	161.795	19.2394	88.6301	21.8343	4.76411	20.5391	3.54328	12.9557	4.27007	25.306	7.31775
CH2N27 6	CH2N27	140.412	10.1637	77.6727	188.525	22.8784	106.674	25.8531	5.3063	23.7721	4.35976	13.5314	5.05978	28.7029	8.89109
CH2N27 7	CH2N27	158.778	10.5476	90.9699	212.528	25.7206	118.557	29.7699	7.23584	29.0577	4.73426	16.0906	5.47639	35.668	9.88175
CH2N27 8	CH2N27	159.881	10.3484	90.5299	210.957	26.0836	115.322	27.5766	6.83993	29.0997	4.8702	15.4786	5.61629	34.943	9.55116
CH2N27 9	CH2N27	164.466	10.9429	91.5959	220.663	26.5713	123.351	28.5031	6.4887	28.3676	5.02328	14.5205	5.45399	34.7342	10.1884
CH2N32 1	CH2N32	101.984	5.34083	33.0197	91.5194	12.6086	71.4396	17.5645	3.83018	21.6275	3.33157	10.4454	2.72987	12.4813	4.4744
CH2N32 10	CH2N32	110.743	6.49058	50.689	143.056	16.0114	86.5278	19.7868	4.27755	18.6892	3.58287	10.4397	3.21172	18.3954	6.32673
CH2N32 11	CH2N32	107.201	5.62912	50.3143	138.625	16.5492	84.1358	19.2001	4.07952	18.9873	3.43374	10.3034	2.79882	16.9249	5.64325
CH2N32 12	CH2N32	111.608	6.06324	49.6448	134.389	16.8862	85.0687	22.0461	4.32087	19.8338	3.6072	10.5255	3.1436	18.2693	10.6319
CH2N32 2	CH2N32	101.011	4.53046	37.0176	102.803	14.4812	75.8943	19.6758	4.16598	22.541	3.5033	10.8819	2.54587	12.9581	4.29909
CH2N32 3	CH2N32	93.6242	5.49158	33.3336	96.4592	12.5743	70.4821	17.5489	3.81952	20.9761	3.27098	9.94923	2.72842	13.3166	4.818
CH2N32 4	CH2N32	118.957	6.10453	48.378	129.618	15.9658	84.3229	20.0706	4.35153	20.5485	3.64222	11.2778	3.24461	17.9632	5.73377
CH2N32 5	CH2N32	98.8673	5.62947	39.0877	109.314	15.4775	70.312	16.961	3.66155	17.612	3.11325	9.2713	2.8079	14.682	4.78575
CH2N32 6	CH2N32	109.429	6.14465	47.2708	131.641	16.68	86.4666	19.9993	4.35509	20.6878	3.68262	10.8158	2.97704	16.902	5.88205
CH2N32 7	CH2N32	94.4284	5.52658	39.1623	108.467	13.401	67.883	16.0105	3.35622	15.7196	3.1071	8.61699	2.68329	14.9395	4.82995
CH2N32 8	CH2N32	101.644	6.22202	49.1007	131.765	16.0307	83.6096	19.1469	4.04693	18.2211	3.39745	9.80928	2.93961	16.9958	5.92151
CH2N32 9	CH2N32	97.0002	6.11476	51.9964	114.331	13.4806	70.213	15.8265	3.59839	16.0297	3.04851	8.99488	3.27197	16.2352	5.52024
CH2N33 1	CH2N33	548.302	2.77978	34.3833	102.058	19.5891	208.996	113.783	31.6626	143.318	22.9542	54.1552	5.06568	7.18476	19.9269
CH2N33 10	CH2N33	756.429	11.1363	53.9238	150.797	26.2333	259.126	132.722	30.9427	150.93	26.5665	57.122	6.08365	10.9362	26.5506
CH2N33 11	CH2N33	598.777	10.4356	47.4914	136.908	25.6494	212.189	108.02	26.6273	121.564	20.6019	44.7042	5.99062	10.328	26.4957
CH2N33 12	CH2N33	854.609	7.29687	51.3501	156.303	28.1777	298.108	152.091	36.0246	174.046	29.5925	62.8934	5.23483	11.1022	30.1817
CH2N33 4	CH2N33	894.941	3.73685	49.3331	137.168	29.3445	330.143	200.805	47.6326	205.891	35.0806	90.6099	5.97326	10.6977	27.1012
CH2N33 5	CH2N33	679.504	8.90264	38.1452	127.901	21.0756	220.274	114.998	28.1595	138.027	23.815	56.2797	5.11596	8.43117	21.5695
CH2N33 6	CH2N33	723.425	10.118	40.5114	136.247	22.3429	230.725	121.33	30.002	147.27	25.1125	58.0161	5.47402	9.5368	24.8535
CH2N33 9	CH2N33	789.067	10.7392	40.9398	187.737	24.5922	242.177	121.665	29.6006	147.03	25.8132	57.8559	4.92894	9.59474	27.2147
CH2S73 1	CH2S73	451.818	5.62884	211.949	435.385	49.6996	280.777	67.2805	15.3886	92.8222	13.9116	34.6577	3.05385	21.8657	9.89595
CH2S73 2	CH2S73	451.222	5.59653	219.736	443.03	50.868	281.012	69.007	15.7511	93.8212	13.8748	35.5045	3.07609	22.0495	10.411
CH2S73 3	CH2S73	462.853	4.80112	224.664	469.55	53.2895	293.437	71.6248	16.5295	96.9002	13.9874	36.7837	3.22993	21.9815	10.7603
CH2S73 4	CH2S73	345.107	3.57424	85.9782	166.975	17.781	100.479	27.9014	6.36841	33.7724	6.9757	25.852	2.90891	18.7461	8.92621
CH2S73 5	CH2S73	787.832	11.3193	327.348	762.493	86.2854	482.093	130.715	26.7087	136.671	24.034	60.6003	6.01014	71.8185	13.9757
CH2S73 6	CH2S73	379.423	3.7058	98.5466	190.72	20.3899	113.327	31.2162	7.28418	39.3108	8.02923	29.7765	3.09229	21.5123	9.6144
CH2S73 7	CH2S73	382.8	4.0266	113.304	234.365	22.0555	121.052	32.2364	7.77837	37.2874	8.00137	29.1353	2.81185	23.9268	11.5626
CH2S73 8	CH2S73	349.395	3.26025	91.9411	177.953	18.8878	102.707	27.8209	6.2999	30.6242	7.04678	26.2024	2.63333	19.4207	9.13716
CH2S73 9	CH2S73	448.697	6.31331	178.487	421.764	47.8716	259.049	67.7191	13.6487	63.1887	13.0266	39.9565	4.13643	40.1432	7.18123
CH2S74 2	CH2S74	420.521	3.43225	129.495	210.985	34.4462	206.291	60.0898	14.2981	100.57	14.1644	40.351	2.00878	26.2831	5.84133
CH2S74 3	CH2S74	336.199	2.32343	95.1929	152.155	25.6101	155.177	46.8034	10.9097	71.9115	10.3606	35.3016	1.37191	17.3355	3.72238
CH2S74 4	CH2S74	598.428	4.12334	225.601	353.584	54.7844	315.765	82.4733	19.2194	106.308	17.9842	51.8301	2.03143	38.8861	8.30675
CH2S74 6	CH2S74	525.754	2.1191	187.29	300.15	44.9708	261.916	70.8198	15.6681	87.817	15.1862	42.4775	2.4088	36.2578	7.44336
CH2S75 1	CH2S75	168.588	6.68726	74.8678	132.182	21.0189	98.0011	24.7243	6.02563	25.2911	4.50264	22.3757	5.27947	12.345	5.14805
CH2S75 3	CH2S75	241.181	9.42323	118.197	228.6	32.2204	164.676	39.4415	9.28959	42.9335	7.68214	33.5999	7.33675	17.4186	7.95019
CH2S75 4	CH2S75	164.784	5.44111	70.0372	71.3851	14.805	79.6647	20.8182	3.84711	20.508	2.89259	7.90104	3.6474	9.51892	16.689
CH2S76 1	CH2S76	153.628	4.35846	60.8281	56.4534	13.8552	68.1768	16.1955	3.41321	17.2807	2.55675	9.77157	3.84918	6.87781	8.85656
CH2S76 10	CH2S76	201.202	6.2288	70.5571	65.6689	16.3594	78.4418	16.725	4.35701	21.6013	3.09583	11.7214	5.55312	9.95855	11.4012
CH2S76 11	CH2S76	175.701	5.20875	69.1982	65.5445	14.8302	73.9615	15.4267	3.79414	18.7824	3.07574	11.7971	3.13756	8.62495	10.1146
CH2S76 12	CH2S76	156.508	5.08547	62.5501	59.377	13.3177	66.1067	16.7976	3.70761	16.405	2.64082	10.5627	3.12358	7.69188	10.1538
CH2S76 2	CH2S76	169.026	4.63475	66.0492	58.3097	14.9036	71.9197	16.771	3.69394	17.1628	2.51805	10.8409	3.17771	7.29104	8.91329
CH2S76 3	CH2S76	151.412	4.48802	60.4143	56.4036	13.8011	67.1089	15.4665	3.16586	17.381	2.58074	9.89476	2.84915	6.80444	8.90005
CH2S76 4	CH2S76	175.232	4.81706	69.9451	67.2045	15.8834	79.9706	17.9144	4.18215	21.2699	3.19475	12.0168	3.12073	9.16148	11.5021
CH2S76 5	CH2S76	170.467	4.52532	70.2995	68.2481	15.2702	75.8971	15.1113	4.06688	18.1685	2.96966	10.9363	3.47242	8.44589	10.8791
CH2S76 6	CH2S76	180.526	5.39159	73.3384	67.3473	16.4436	80.7063	17.4501	4.30607	18.9991	2.98679	12.7569	4.38283	8.69048	11.0239
CH2S76 7	CH2S76	159.612	4.50075	62.2189	58.4905	13.6282	64.6414	16.5283	3.4111	17.6089	2.67173	11.0413	3.41125	7.07577	9.20555
CH2S76 8	CH2S76	175.977	5.09721	67.3081	60.5938	14.6543	71.1239	16.7739	3.81681	19.72	3.10396	11.5164	3.4919	8.36112	9.63172
CH2S76 9	CH2S76	153.453	4.52554	60.8406	57.1606	13.498	64.5278	15.1497	3.3255	16.7768	2.3464	9.68052	2.68554	6.84985	8.63028
CH2S77 1	CH2S77	364.184	3.57938	112.745	155.269	26.3817	157.663	41.8459	9.61439	61.2131	8.8014	26.0505	2.6111	13.7149	5.16463
CH2S77 3	CH2S77	465.809	3.52001	122.078	173.862	25.7202	158.544	42.3937	9.91048	64.8597	9.13929	29.4383	2.57252	11.4655	8.05724
CH2S77 4	CH2S77	391.367	3.94254	145.87	202.068	32.1857	171.428	43.5231	9.55531	52.3291	8.40867	23.1982	1.82413	16.6468	5.43493
CH2S77 5	CH2S77	342.142	4.10049	126.104	174.14	26.1056	148.238	37.3979	8.30597	44.977	7.30223	21.5908	2.18819	15.2291	4.66449
CH2S77 6	CH2S77	356.13	2.8141	120.416	176.063	27.3118	149.419	38.3943	7.8259	46.5253	8.34865	20.3965	1.76858	13.3478	5.14836
CH2S77 7	CH2S77	462.487	4.34175	172.911	234.112	35.1157	192.05	48.1865	10.5422	57.2417	9.67333	27.7504	2.82567	19.0663	6.17001
CH2S77 8	CH2S77	425.043	2.74467	148.894	202.332	27.1929	154.821	38.9602	9.38629	48.4119	7.99077	24.8131	2.6199	13.2841	10.132
CH3N20 2	CH3N20	627.503	4.40625	278.549	302.179	49.2054	279.062	63.8372	14.6029	99.7212	14.0198	29.5855	2.44484	7.49662	1.81864
CH3N20 3	CH3N20	657.772	4.13787	276.379	296.328	48.9161	283.388	64.6427	14.7453	99.4206	13.4632	32.2033	1.88936	7.0733	1.766
CH3N20 4	CH3N20	375.72	2.65948	190.047	202.175	31.2687	166.047	36.0487	8.17549	43.9417	7.13786	17.6336	1.37129	4.91764	1.18892
CH3N20 6	CH3N20	560.784	4.49753	316.188	329.119	51.4905	273.116	58.9018	12.9154	70.4045	10.6298	23.5355	2.02304	7.60029	1.7542
CH3N20 7	CH3N20	352.306	4.50238	186.225	219.897	29.3228	154.872	32.2751	7.19666	40.5112	6.40127	14.3607	2.83522	7.06587	1.32477
CH3N21 1	CH3N21	428.013	5.19688	207.442	149.745	27.2084	150.69	32.8748	8.24846	54.4395	7.24183	17.556	2.13444	10.922	2.02562
CH3N21 10	CH3N21	377.529	2.99339	222.395	172.93	28.8724	144.257	29.1819	7.15451	35.4992	6.35515	14.893	2.17778	11.1259	2.08923
CH3N21 11	CH3N21	558.242	6.1305	318.221	211.253	38.1855	205.771	44.5367	10.2225	53.9255	9.87923	21.4333	2.41639	15.2798	2.07135
CH3N21 12	CH3N21	364.122	4.53917	205.454	158.395	25.7165	131.277	28.1504	6.88957	33.1492	6.41105	14.9773	1.95691	10.7406	2.29095
CH3N21 2	CH3N21	331.93	4.07135	150.678	115.38	20.45	114.912	25.0699	6.47758	40.6366	5.80832	14.4922	1.89446	8.17086	1.54673
CH3N21 3	CH3N21	324.697	4.19069	148.855	113.318	20.2647	112.21	24.7124	6.11939	39.7409	5.69219	14.1642	1.79101	7.84079	1.39656
CH3N21 4	CH3N21	311.111	4.02099	158.348	123.557	21.4512	116.766	23.4689	5.93952	33.9143	5.40146	13.8134	1.73536	7.85811	1.58704
CH3N21 5	CH3N21	355.469	4.77024	184.723	143.599	24.7221	132.523	27.8588	6.81463	38.7672	6.06751	14.8988	1.76328	8.92412	1.72208
CH3N21 6	CH3N21	324.918	3.99338	162.866	125.484	21.4678	113.771	24.6961	6.02851	34.3609	5.37822	14.5009	1.72899	8.42522	1.57145
CH3N21 7	CH3N21	353.117	4.46855	185.888	140.532	23.497	123.061	26.4503	6.3924	33.1236	5.78209	15.6155	1.81042	9.94313	1.78426
CH3N21 8	CH3N21	343.554	4.38709	181.762	138.526	24.389	123.047	26.1476	6.33298	33.307	5.64621	13.8574	1.75437	9.58659	1.76816
CH3N21 9	CH3N21	429.072	6.0929	218.265	165.357	28.4242	150.997	32.001	7.22435	39.9291	6.40234	17.0622	1.91349	10.561	1.82125
CH3N22 1	CH3N22	158.564	8.40814	55.9331	131.782	18.8345	105.943	26.9682	6.51685	34.9999	5.86911	19.2604	4.76382	25.0152	7.40532
CH3N22 10	CH3N22	167.232	8.52465	66.6036	150.069	19.5799	103.828	26.7023	6.32276	26.5006	5.67655	18.5398	5.03886	31.5236	8.84273
CH3N22 11	CH3N22	159.787	9.08877	67.5727	157.474	21.1466	112.417	27.0515	6.15235	25.9979	5.50691	17.1279	4.71947	28.8505	8.46787
CH3N22 12	CH3N22	158.692	8.34424	66.0799	152.858	20.5566	107.962	26.4387	5.71617	25.1011	5.3525	17.4993	4.63887	28.9097	7.98554
CH3N22 2	CH3N22	145.486	8.06924	52.1913	120.879	17.8671	98.1033	25.6445	6.10865	33.9533	5.4649	17.7704	4.67892	24.0239	6.86735
CH3N22 3	CH3N22	149.011	8.14001	51.2898	118.781	17.2823	97.5109	25.4062	5.91866	34.0082	5.4519	17.1901	4.54552	23.4045	6.86651
CH3N22 4	CH3N22	159.2	8.34854	58.9425	139.597	19.1345	104.121	26.3358	5.99691	29.0928	5.3915	17.4262	4.42596	26.0457	7.59807
CH3N22 5	CH3N22	158.371	9.22215	60.1295	140.61	19.5501	104.971	27.2346	6.05926	29.9664	5.56011	17.1491	4.94727	26.8146	7.68952
CH3N22 6	CH3N22	179.144	10.0639	70.823	164.572	22.7588	123.477	31.2582	7.09115	34.6602	6.40984	20.0133	5.06958	32.1487	9.29967
CH3N22 7	CH3N22	162.801	8.7962	65.5512	150.503	20.383	108.382	27.233	6.27614	27.3953	5.5437	18.3764	4.83536	29.6439	8.50566
CH3N22 8	CH3N22	185.823	7.84173	69.6301	136.897	20.7683	115.215	30.7539	6.5795	31.2254	6.36314	22.6321	4.84176	29.425	6.12656
CH3N22 9	CH3N22	170.449	9.49948	67.9567	158.44	21.6928	114.768	28.9646	6.77478	29.7959	5.79751	18.7979	4.81902	31.1865	8.91902
CH3N23 1	CH3N23	135.865	6.14683	32.6433	78.4063	11.7123	66.5013	17.3802	3.78331	22.6164	3.79711	13.6552	3.21013	14.7774	3.98734
CH3N23 2	CH3N23	125.466	4.6459	29.6959	70.3831	10.3494	59.3399	14.9554	4.48625	19.4922	3.40186	11.9182	2.04149	13.4014	3.49007
CH3N23 3	CH3N23	143.909	6.83297	40.5301	91.5365	13.5705	74.2679	18.2948	4.31313	24.6977	4.31542	14.1071	2.89206	14.9984	5.75851
CH3N23 4	CH3N23	126.209	5.17085	32.6361	78.9629	11.3459	61.2042	15.5609	3.74529	18.4586	3.25538	11.965	2.85492	15.0847	4.22827
CH3N23 5	CH3N23	145.811	5.07331	40.3398	91.9257	13.535	70.1271	16.8814	3.30209	23.1503	3.93822	13.5005	3.15665	17.0252	4.58008
CH3N23 6	CH3N23	134.695	5.10837	34.1361	77.844	11.2246	64.2323	16.2115	2.64149	19.0474	3.33474	12.5312	2.73671	17.6028	4.16727
CH3N23 7	CH3N23	131.127	5.35113	37.7466	83.2373	11.5485	61.8829	15.2422	3.31297	18.6973	3.61882	11.1698	3.4983	17.6418	4.59624
CH3N23 9	CH3N23	147.119	5.68425	38.6035	91.7347	12.8596	69.4278	17.2739	3.5855	19.9759	4.06535	12.8468	2.9516	18.0059	4.8652
CH3N24E 1	CH3N24E	209.116	8.85042	52.0853	129.548	21.3694	124.665	32.0076	7.8948	53.942	7.33212	24.3932	5.43931	25.9494	7.08196
CH3N24E 2	CH3N24E	231.665	9.54174	60.0121	146.573	24.2848	142.123	36.2994	8.84362	59.7788	8.15894	27.2149	5.68915	28.8847	7.90622
CH3N24E 3	CH3N24E	209.819	8.73807	53.3278	129.45	21.6795	127.925	32.1699	7.79923	53.8022	7.37219	24.282	5.17338	25.7126	6.93537
CH3N24E 4	CH3N24E	197.47	8.68961	57.8114	138.835	21.5471	119.22	29.7894	6.61325	36.6716	6.03626	19.4531	4.64261	28.9274	6.50771
CH3N24E 5	CH3N24E	235.972	10.3832	69.996	169.144	25.9333	140.763	34.7997	7.88669	42.371	7.08059	22.8727	5.03536	31.0113	8.04683
CH3N24E 6	CH3N24E	207.251	5.53792	64.7149	163.529	23.7385	129.258	32.7944	7.15523	39.022	6.35442	20.6322	4.8019	27.0744	6.94695
CH3N24E 7	CH3N24E	221.49	9.99932	73.4717	179.417	25.3823	133.571	30.9212	7.04129	34.2398	6.60504	21.087	5.18337	31.8343	8.15096
CH3N24E 8	CH3N24E	223.265	5.79838	77.9002	186.799	26.7014	144.395	33.1586	7.37691	36.1979	6.77522	21.4601	5.71469	32.8151	8.00766
CH3N24E 9	CH3N24E	239.326	7.27723	75.6131	176.986	25.5259	138.245	33.232	7.17922	36.9367	6.81449	22.1549	5.41088	34.0721	7.8324
CH3N24W 1	CH3N24W	151.719	7.68467	43.1218	95.8618	14.4403	82.34	21.5945	5.49991	36.4478	5.4613	17.8247	4.5503	21.6651	5.50984
CH3N24W 10	CH3N24W	157.178	7.88469	58.7019	129.793	16.7733	86.0442	21.3408	5.01233	23.3116	4.71844	16.023	4.84431	29.0067	6.8867
CH3N24W 11	CH3N24W	159.484	8.27712	60.7445	135.58	17.3453	90.4519	21.9498	5.25838	23.8477	5.04958	16.482	4.54041	28.6871	7.12332
CH3N24W 12	CH3N24W	149.089	8.36224	58.3294	135.542	17.014	88.5791	21.1684	5.01967	21.6932	4.80506	15.341	4.21326	26.0337	7.90763
CH3N24W 2	CH3N24W	151.707	7.73253	43.3296	96.4544	14.1807	80.5524	21.5312	5.46876	35.6677	5.35271	17.6549	4.38065	21.501	5.80356
CH3N24W 3	CH3N24W	162.03	7.87687	43.8547	97.3926	14.4018	83.9135	22.9644	5.42314	37.0962	5.65543	18.9957	4.33095	23.0137	5.88982
CH3N24W 4	CH3N24W	175.96	9.17144	56.0115	125.254	17.6747	96.1664	24.0244	6.05129	31.9324	5.81347	19.0156	4.78167	27.0711	7.19902
CH3N24W 5	CH3N24W	159.133	8.11323	51.9754	114.019	16.0956	89.2769	22.877	5.42261	30.2546	5.17512	17.3153	4.61792	25.8825	6.30685
CH3N24W 6	CH3N24W	132.688	7.28038	42.1884	91.6421	12.7005	68.0895	17.2799	4.16562	22.9896	4.1963	13.893	3.76026	19.7924	5.31638
CH3N24W 7	CH3N24W	165.97	8.37721	57.6205	127.803	17.3046	90.9754	23.0167	5.4251	26.922	5.27425	16.763	4.70485	27.7707	6.44747
CH3N24W 8	CH3N24W	158.273	7.52987	52.0474	115.614	15.7755	84.0904	20.2478	4.84613	23.6866	4.749	15.8737	4.7704	25.3176	5.77144
CH3N24W 9	CH3N24W	153.401	7.34083	50.6597	107.048	14.765	81.3544	21.428	4.97253	24.2095	4.63797	16.7769	5.43818	21.4041	4.91047
CH3S83 1	CH3S83	192.147	5.46529	68.8301	111.234	15.8	79.5248	21.6422	5.21724	26.814	5.08047	22.258	5.4315	26.2858	4.68623
CH3S83 2	CH3S83	226.008	6.32738	75.2034	131.21	18.4263	92.462	25.6959	5.99677	29.906	5.97665	26.5842	6.46933	31.4756	5.45469
CH3S83 3	CH3S83	230.886	6.50767	79.5513	133.595	18.9991	93.8692	25.4494	6.36214	34.4046	6.41507	27.1124	7.27403	32.5581	5.28594
CH3S83 4	CH3S83	219.914	7.5926	74.8962	121.635	17.0632	87.3334	24.5445	5.98888	30.3427	5.88272	26.6708	6.78021	31.1159	5.28746
CH3S83 5	CH3S83	203.832	6.87954	69.9199	117.873	16.513	83.0616	23.4668	5.59622	27.4398	5.55327	24.5408	6.32479	28.0258	4.64086
CH3S83 6	CH3S83	257.093	7.18987	86.0391	139.735	20.0504	101.47	29.9471	6.59064	36.9594	6.57237	29.3834	6.78013	35.1516	5.40318
CH3S83 7	CH3S83	254.191	8.64412	87.5979	149.618	21.484	109.328	28.8408	7.47034	37.0777	6.89203	30.443	8.17269	37.6496	6.1682
CH3S83 8	CH3S83	236.321	6.82326	80.6843	132.394	18.6779	98.603	26.9332	6.56372	32.1037	6.00905	24.7213	7.5125	31.5381	5.12619
CH3S83 9	CH3S83	190.657	5.19549	62.0568	107.167	14.5693	74.4568	19.5554	5.13674	26.3041	5.19074	20.1596	5.77653	24.5982	4.17871
CH3S85 1	CH3S85	612.266	10.4443	322.376	434.479	62.5976	329.661	81.8153	18.8723	144.424	17.7046	48.344	5.7188	9.66987	17.5472
CH3S85 2	CH3S85	590.263	9.72829	299.707	403.124	58.1458	311.483	74.1994	17.4085	131.12	16.491	48.2748	5.32554	8.96422	16.341
CH3S85 3	CH3S85	573.271	9.65063	296.676	396.921	56.9355	302.851	73.8401	17.3044	132.499	16.3262	47.4518	5.20737	8.46074	15.5292
CH3S85 4	CH3S85	620.945	10.6805	381.296	509.511	69.1005	345.382	79.8396	18.2364	104.08	16.4261	45.568	5.56453	10.8646	19.3484
CH3S85 5	CH3S85	593.011	10.037	351.365	468.01	63.8424	321.572	73.9675	17.1657	96.7249	15.3284	43.7343	5.68945	9.94141	17.2704
CH3S85 6	CH3S85	519.398	9.08496	331.687	447.512	61.2741	311.187	67.1914	16.0032	90.6433	13.8234	39.1525	4.74241	8.38635	15.9272
CH3S85 7	CH3S85	526.069	9.66577	336.814	468.942	61.4108	297.652	64.4308	15.1687	75.5173	12.8767	38.2169	4.99995	9.75025	16.6827
CH3S85 8	CH3S85	608.482	10.5562	402.655	546.732	70.7234	348.62	76.6197	17.7779	88.4302	15.3277	43.9559	5.52806	11.6226	20.4706
CH3S85 9	CH3S85	478.118	8.8012	301.353	438.218	55.8318	269.468	58.803	13.4239	68.2743	11.606	32.6102	4.15097	7.87523	16.5774
CH4N13E 1	CH4N13E	478.481	6.44585	170.816	372.413	53.7381	259.257	60.5874	14.2809	67.497	12.8019	42.6472	12.0975	61.3926	16.2443
CH4N13E 2	CH4N13E	488.061	4.51488	173.527	399.461	56.0359	270.933	64.7555	14.9407	69.9891	12.7768	44.7807	10.1671	62.8766	18.7958
CH4N13E 3	CH4N13E	454.701	21.6766	162.48	355.597	50.723	245.193	60.9226	14.1132	65.2558	12.493	41.3465	11.6098	64.1679	15.0007
CH4N13E 4	CH4N13E	490.563	3.64073	176.359	402.894	57.255	272.317	62.6009	15.4081	73.3882	13.4183	45.6336	10.8969	62.5714	18.1563
CH4N13E 5	CH4N13E	340.181	13.6276	140.834	366.308	47.9835	220.737	51.0857	13.0165	53.6098	9.89298	31.6281	7.99098	50.9434	16.3932
CH4N13E 6	CH4N13E	418.287	5.61039	146.711	355.58	48.2784	232.055	53.5803	13.1255	60.9248	11.202	37.5505	9.51967	55.3066	19.6864
CH4N13E 7	CH4N13E	409.081	21.0741	149.81	350.196	47.6876	228.308	56.5231	13.4768	61.1888	11.384	38.7956	10.5617	62.0476	18.6519
CH4N13E 8	CH4N13E	492.107	18.9869	169.488	390.454	54.0973	254.714	64.2568	15.8105	70.008	11.9305	43.343	10.4209	69.0377	16.9628
CH4N13E 9	CH4N13E	375.922	9.56369	149.748	328.211	46.1482	220.067	50.1365	13.0347	56.7384	9.70439	34.6632	10.2194	54.8176	14.9994
CH4N13W 1	CH4N13W	224.068	15.6524	96.0038	200.929	29.7788	150.224	38.743	9.27835	34.9194	6.99401	22.7466	7.23151	45.4376	10.2272
CH4N13W 2	CH4N13W	329.863	14.7806	152.239	362.081	50.8035	250.509	55.9437	13.1846	58.11	10.3677	33.3813	10.2654	57.7374	17.5979
CH4N13W 3	CH4N13W	79.649	9.26433	47.3601	94.1786	13.4734	59.2456	14.413	2.84167	14.6385	2.51069	8.63136	5.72472	19.4873	3.84307
CH4N13W 4	CH4N13W	208.544	12.4359	89.3578	199.053	28.7221	140.31	33.7807	7.48088	36.9054	6.51151	21.2401	6.61486	37.475	9.56559
CH4N13W 5	CH4N13W	201.409	12.1374	86.9562	195.343	28.0849	139.631	31.9251	7.57581	36.8272	6.4984	18.8051	5.89576	35.0571	9.68021
CH4N13W 6	CH4N13W	237.376	14.088	99.1182	210.498	30.9612	152.989	32.4216	8.61842	43.2357	7.2958	21.5672	7.44281	38.8508	9.35477
CH4N13W 7	CH4N13W	118.033	10.0718	63.3523	117.785	16.6704	83.5586	19.4358	4.25495	20.3002	3.93947	11.6668	6.85346	24.8708	5.56507
CH4N13W 8	CH4N13W	190.948	11.775	85.4383	189.23	27.2336	135.033	32.1365	7.61464	34.0115	5.94281	19.9903	5.7451	34.9451	8.80207
CH4N13W 9	CH4N13W	215.996	17.8749	91.9824	188.403	32.9804	136.53	32.468	7.07554	37.4698	7.57909	22.6455	7.41658	47.7992	8.64097
CH4N14 1	CH4N14	116.48	7.66384	47.1074	106.924	16.254	87.0485	24.0898	4.55123	27.9627	4.04704	13.2946	3.90297	16.6285	6.17327
CH4N14 2	CH4N14	141.526	9.15931	43.81	102.357	15.7009	87.0284	22.4286	4.98941	30.3296	4.6324	16.0848	4.39222	19.8687	6.02268
CH4N14 3	CH4N14	131.135	8.44296	43.6515	100.428	15.5378	85.5353	22.1133	5.61188	29.8468	4.40596	15.6908	4.4171	20.5924	5.41125
CH4N14 4	CH4N14	131.69	8.40481	51.7193	114.829	16.8627	88.9821	22.1062	4.67159	24.1443	4.18691	13.7817	4.37414	21.969	5.78649
CH4N14 5	CH4N14	145.104	8.97485	57.1969	126.295	18.0957	93.1879	23.3242	5.42331	25.7155	4.74741	15.5394	4.73249	24.9363	6.88729
CH4N14 6	CH4N14	135.843	8.31966	54.8628	120.158	17.6811	92.8839	21.5558	4.5121	24.2507	4.10562	13.7521	4.13463	21.1807	5.65811
CH4N14 7	CH4N14	119.982	8.75333	45.9824	104.69	14.0623	71.9523	18.4161	3.90763	21.5394	3.59045	12.059	4.51393	21.9888	5.79771
CH4N14 8	CH4N14	132.906	8.93062	81.5602	180.395	24.9108	113.546	25.734	5.41928	26.4994	4.21721	13.6039	4.83923	25.4403	6.30213
CH4N14 9	CH4N14	126.373	8.27229	53.9315	116.639	16.2384	84.9364	20.0239	4.31235	21.1954	3.69449	12.8034	4.10019	22.427	5.66576
CH4N15 1	CH4N15	163.837	8.58212	43.8767	111.131	16.8315	93.7605	24.5614	5.41565	32.2001	5.30193	18.2795	4.15509	19.8207	7.12048
CH4N15 10	CH4N15	213.58	10.4985	72.6183	178.426	23.4505	126.491	31.1655	6.80014	35.5193	6.58361	20.7564	7.62748	31.7166	8.92351
CH4N15 11	CH4N15	196.926	10.9383	68.5186	168.199	22.5858	117.338	28.8453	6.29886	33.3763	6.06227	19.8786	5.25344	28.7273	8.82292
CH4N15 12	CH4N15	209.918	10.073	68.5502	165.003	23.3613	121.21	30.1474	6.79494	33.5991	9.35604	20.475	5.73898	32.767	8.11697
CH4N15 2	CH4N15	179.706	8.88457	50.0352	126.352	19.134	108.398	27.5595	6.30587	36.4765	5.90624	20.3037	4.60318	21.9883	6.85601
CH4N15 3	CH4N15	180.868	9.45645	50.5137	127.53	19.1791	105.691	27.5418	6.23069	35.8024	5.88526	20.9287	4.52188	23.3462	8.4492
CH4N15 4	CH4N15	178.879	9.34123	56.1636	139.435	19.5567	106.606	26.463	6.09248	30.6302	5.53221	18.5876	4.5787	24.6551	7.11978
CH4N15 5	CH4N15	184.209	9.34523	58.5813	145.512	20.471	108.835	27.7627	6.0863	31.3915	5.70197	19.0097	4.55411	24.9716	7.64772
CH4N15 6	CH4N15	172.356	8.81435	53.9878	134.861	18.8695	100.756	24.8446	5.3234	28.96	5.37543	18.2747	4.56683	23.7567	6.95833
CH4N15 7	CH4N15	173.568	8.17978	67.326	186.037	24.8992	118.061	27.9271	6.56658	30.4141	5.49534	18.5107	4.32443	26.7401	9.62621
CH4N15 8	CH4N15	169.667	7.30397	60.5169	153.548	19.7645	105.795	25.6483	5.89845	29.8135	5.43868	18.5146	4.69617	26.1032	8.41418
CH4N15 9	CH4N15	187.494	7.57572	67.304	170.059	22.0424	115.61	28.0231	6.55375	31.0648	5.86929	19.9162	4.80897	27.3841	8.83495
CH4N16 1	CH4N16	208.299	9.9721	85.8121	210.084	25.343	132.624	33.8707	6.66606	35.3451	6.51194	21.1981	4.69708	24.4017	5.51937
CH4N16 10	CH4N16	210.931	10.8453	80.6081	164.433	22.4263	118.533	30.5512	6.79901	33.6025	6.24211	21.6011	5.64942	34.5065	7.03325
CH4N16 11	CH4N16	231.123	11.4448	83.3273	193.977	24.9937	124.719	29.7137	6.19495	35.5617	6.30871	21.5145	6.12031	35.5877	10.1127
CH4N16 12	CH4N16	222.533	11.1944	79.1094	176.981	23.662	124.281	29.5133	6.52991	32.3638	6.27417	21.6575	6.40829	34.587	7.57581
CH4N16 2	CH4N16	167.526	8.08711	48.7875	113.326	16.3926	86.2937	22.3898	5.30978	26.8553	4.82421	17.357	4.11041	21.3733	4.48314
CH4N16 3	CH4N16	150.529	7.42302	39.9461	91.6137	13.4688	70.4443	18.773	4.06796	23.4263	3.97187	14.7148	3.86877	18.3944	5.89488
CH4N16 4	CH4N16	234.567	12.1539	105.225	223.513	29.3607	147.898	35.5553	7.70386	39.2935	7.33801	21.6864	5.48974	32.9881	8.45755
CH4N16 5	CH4N16	226.451	8.55599	99.777	206.145	27.2615	141.055	34.8503	7.50174	37.4281	6.8257	23.7553	5.14091	30.9193	7.58908
CH4N16 6	CH4N16	207.277	9.63832	95.132	238.696	25.9932	134.593	39.7696	6.75415	34.2393	6.14003	19.9765	5.67014	31.1312	7.53844
CH4N16 7	CH4N16	191.363	11.1713	88.3683	223.187	20.9364	120.76	25.5588	6.92484	29.3304	7.17087	19.2951	5.67699	32.5343	6.7973
CH4N16 8	CH4N16	241.103	10.8762	128.873	260.244	33.0609	166.362	38.6046	8.31085	41.4682	7.50651	24.1991	5.97959	35.7307	9.71269
CH4N16 9	CH4N16	242.923	10.7679	97.1008	219.688	27.0712	138.645	34.4727	8.22087	36.025	7.24314	24.6724	6.15229	33.4432	10.6139
CH4N17 1	CH4N17	274.421	8.61637	70.4451	181.921	27.5887	161.911	42.3406	11.1677	76.4824	10.0304	34.1919	8.55723	36.9626	12.0737
CH4N17 2	CH4N17	320.207	5.19794	80.3463	198.183	32.0248	182.079	49.6571	13.0181	86.2293	11.4888	40.0123	9.75964	43.2124	14.5962
CH4N17 3	CH4N17	379.287	1.67644	99.0184	253.408	38.801	219.685	58.2058	16.1195	98.4356	13.5352	46.3007	11.0466	51.6728	17.7001
CH4N17 5	CH4N17	308.777	5.243	89.0049	229.571	32.2403	169.78	43.1652	10.7853	54.7085	9.45575	32.4831	8.00813	42.2517	15.2335
CH4N17 6	CH4N17	337.13	3.96551	99.635	315.708	36.2682	209.363	49.7037	12.1284	62.57	10.5992	36.6166	8.79724	47.1605	16.3584
CH4N17 7	CH4N17	298.589	20.8648	101.014	243.405	30.8861	163.536	41.7268	9.36635	50.8026	8.55826	29.8374	8.74464	52.2961	14.939
CH4N17 8	CH4N17	491.89	1.96087	156.8	364.281	49.7397	269.235	65.7961	15.1147	74.3636	14.5222	48.7492	12.742	75.6197	22.362
CH4N17 9	CH4N17	272.35	9.04373	97.7036	248.179	33.1693	168.503	40.4661	10.0515	43.5528	8.20481	27.716	7.72315	45.0316	17.1882
CH4S88 10	CH4S88	83.4406	3.46317	33.9756	44.3392	8.09301	42.4508	10.6301	2.51119	12.6513	2.06404	6.22704	2.24779	4.65776	5.95544
CH4S88 11	CH4S88	86.4446	3.62985	35.4594	46.0708	7.99193	42.6861	10.1354	2.50214	12.2414	1.9521	6.0441	2.09643	4.4002	5.81001
CH4S88 12	CH4S88	100.544	3.84872	41.3472	52.6989	9.74478	52.1672	13.8459	3.26819	14.9049	2.46039	7.75726	2.32854	5.39415	6.88307
CH4S88 2	CH4S88	78.9731	2.91038	25.0171	40.8446	5.89892	31.2741	8.63413	1.9701	11.0995	1.64969	5.53791	1.61284	3.5231	5.12662
CH4S88 3	CH4S88	79.7538	3.47386	25.4171	27.5325	6.04742	33.1103	8.25484	2.00492	10.8954	1.59583	5.12227	1.65458	3.63952	5.82556
CH4S88 4	CH4S88	77.9588	3.02305	28.6458	36.2	5.93702	32.9731	8.04896	1.82892	9.93431	1.50371	4.9243	1.37533	3.85706	6.60451
CH4S88 5	CH4S88	81.7208	3.19692	28.4932	34.7898	6.29705	33.2369	8.15501	1.97116	9.94813	1.56626	5.48877	1.32456	4.10849	5.82524
CH4S88 6	CH4S88	90.4139	3.41478	30.8866	38.7835	7.74352	36.8744	8.9769	2.29396	11.2749	1.72406	5.48015	1.74245	4.48614	6.40317
CH4S88 7	CH4S88	94.3074	3.47877	34.471	40.9805	7.04903	38.2089	9.8914	1.94286	11.4768	1.62486	5.51801	1.8613	5.09922	7.01389
CH4S88 8	CH4S88	86.3644	3.36586	31.0596	39.0995	6.69024	36.6678	8.59363	3.40314	10.3618	1.66616	5.183	2.34614	4.38549	6.49993
CH4S90 1	CH4S90	459.205	25.7844	323.454	697.992	90.8032	486.868	117.649	27.0139	174.388	20.6466	78.9576	20.082	37.0812	17.3266
CH4S90 2	CH4S90	483.222	25.2266	334.426	688.028	93.4602	506.176	122.366	27.3864	184.262	21.5912	82.0329	20.1918	35.75	16.4205
CH4S90 3	CH4S90	515.27	27.6474	360.019	742.591	99.8841	538.269	129.762	28.6065	188.001	22.9715	85.1553	20.8821	38.2372	17.3721
CH4S90 4	CH4S90	673.954	11.7987	440.094	601.617	78.4769	393.612	88.3951	21.3494	119.713	17.465	51.5062	6.21525	12.1169	21.8331
CH4S90 5	CH4S90	605.757	10.8694	376.537	515.55	67.9695	347.01	77.053	18.0989	102.817	15.7193	44.7341	5.72465	9.75982	18.6303
CH4S90 6	CH4S90	651.285	10.8745	402.973	550.868	72.6957	366.725	84.0644	19.7191	109.021	16.2165	47.4011	6.51024	11.4732	19.2368
CH4S90 7	CH4S90	634.059	9.90503	385.493	531.318	68.453	336.027	74.7001	13.588	87.857	15.3057	44.3782	5.27703	11.0108	18.5503
CH4S90 8	CH4S90	171.672	6.80711	60.6219	113.623	15.2901	69.6739	20.847	1.68738	23.731	5.0701	22.8525	9.46079	25.8097	4.70034
CH4S90 9	CH4S90	186.008	7.8243	64.3868	126.456	16.5894	78.537	21.5679	3.4038	24.855	5.25148	25.0753	9.82499	29.3386	5.43185
CH4S91 1	CH4S91	137.617	5.82194	44.9588	65.2935	10.4786	61.1515	15.292	4.66472	19.8453	2.52824	10.4811	3.95315	8.29647	4.02639
CH4S91 2	CH4S91	131.578	8.62545	47.5349	70.59	10.9622	61.8617	14.6019	3.53927	19.6965	2.64567	8.75153	4.09388	8.66442	4.3595
CH4S91 3	CH4S91	136.028	9.38211	49.6199	70.85	13.3877	60.8306	14.4903	3.74842	21.4245	2.6207	9.55614	4.47053	10.4204	4.28243
CH4S91 4	CH4S91	93.1124	8.19579	31.9571	48.3326	7.94594	40.6919	9.36825	2.1449	11.2845	1.63943	6.34254	4.07451	7.16119	3.46798
CH4S91 5	CH4S91	135.868	10.0606	50.7137	75.1385	11.3317	62.0665	14.8913	3.31561	16.6524	2.3236	9.00024	5.0086	11.2699	4.68838
CH4S91 6	CH4S91	106.734	7.82711	35.7228	54.5034	8.12684	47.7043	13.4871	2.36203	12.9969	1.40009	7.19853	3.84384	7.84574	3.88334
CH4S91 7	CH4S91	139.002	6.21504	53.5314	82.335	12.1644	65.1276	15.154	3.26389	15.5782	2.50161	9.14593	4.56328	10.0922	5.80549
CH4S91 8	CH4S91	122.759	8.55165	50.7681	79.3788	11.0708	60.3745	14.3807	2.8699	13.7143	2.18349	8.33978	4.21412	9.98054	5.39435
CH4S91 9	CH4S91	137.286	5.48316	58.5886	89.4259	12.7651	66.2156	14.4731	3.50556	14.9077	2.49398	8.52159	4.56748	10.1887	11.8797
CH4S92 1	CH4S92	7.08717	1.39406	3.94269	7.08282	0.947334	5.26334	1.54442	0.726316	1.64105	0.187002	0.625125	1.10856	1.49391	0.878222
CH4S92 2	CH4S92	7.22447	1.34174	7.0146	7.26735	1.02562	5.77946	1.14023	0.223272	1.95182	0.214661	0.905384	1.14372	1.57808	0.320012
CH4S92 3	CH4S92	10.5525	1.64291	11.2544	19.5554	1.60591	14.1916	1.89928	0.418054	2.47249	0.394346	0.786264	1.47899	2.02785	0.317413
CH4S92 4	CH4S92	36.831	2.71838	14.8765	26.5053	2.57603	13.4083	3.35228	0.728488	4.54486	1.17089	2.40392	1.17938	3.29349	1.04382
CH4S92 5	CH4S92	45.9607	3.40156	75.5904	42.8901	3.3041	17.3601	4.27799	0.996531	5.09362	0.949588	3.09009	1.18638	4.13056	1.40175
CH4S92 6	CH4S92	9.12094	1.47725	5.99518	11.3269	1.39615	6.23074	1.30074	0.191343	1.5886	0.478653	0.521684	1.02605	1.89751	0.309321
CH4S92 9	CH4S92	59.9637	4.10329	22.8009	48.3349	4.03887	21.7965	5.41401	1.5641	8.77111	1.13364	3.76872	4.84138	4.70665	1.65521
CH5N10E 1	CH5N10E	114.516	7.23939	40.3497	83.3729	13.0712	70.8721	18.1537	4.25069	27.1367	3.93489	11.9946	4.42648	19.1833	3.46104
CH5N10E 2	CH5N10E	125.635	7.61817	46.1984	105.029	15.2376	80.3577	20.8748	4.88735	29.4335	4.26905	13.0929	4.21633	21.6558	4.25715
CH5N10E 3	CH5N10E	117.202	7.44298	43.6928	93.2411	13.8623	77.4984	19.1545	4.7562	28.2822	3.89501	13.0269	3.98762	19.3987	4.12521
CH5N10E 4	CH5N10E	152.683	8.51635	60.3069	124.69	17.5798	95.0195	23.245	5.51416	27.6115	4.7412	16.247	5.51649	27.8737	5.17377
CH5N10E 5	CH5N10E	143.067	8.02973	59.446	117.962	17.5757	91.5112	23.7757	5.20655	26.5442	4.35233	15.3237	4.98077	27.5181	4.81267
CH5N10E 6	CH5N10E	103.819	7.11251	50.8569	103.51	14.4901	76.9333	17.512	4.02616	19.9027	3.31294	11.1128	4.11627	20.9128	4.09583
CH5N10W 1	CH5N10W	586.944	3.82479	248.763	269.188	46.366	283.768	67.9967	16.6984	137.385	14.942	34.5111	2.04553	6.15569	1.73666
CH5N10W 10	CH5N10W	836.071	5.73497	490.464	498.909	72.0718	390.194	84.6673	19.2202	103.357	16.3426	36.6293	2.44512	11.7738	2.728
CH5N10W 11	CH5N10W	874.251	5.26288	487.224	513.305	73.8381	392.388	84.9872	19.1765	101.066	16.0694	37.4688	2.26198	11.0916	2.55013
CH5N10W 12	CH5N10W	835.118	7.85229	444.403	463.423	67.5857	362.602	80.0054	18.1133	94.7788	15.2825	35.3166	1.93009	9.78656	2.11434
CH5N10W 4	CH5N10W	790.745	4.58337	356.758	366.827	57.3982	330.449	74.0527	17.9324	111.01	14.9642	36.0361	1.36181	7.84951	1.9713
CH5N10W 5	CH5N10W	355.986	4.50627	134.255	87.8051	19.1786	107.225	24.4599	5.73529	37.9834	5.30403	13.3708	1.53927	8.96692	1.96688
CH5N10W 6	CH5N10W	364.273	4.76023	138.743	90.8215	19.6942	109.797	24.2552	5.55645	38.8135	5.5108	12.5495	1.60781	9.58388	2.02812
CH5N10W 7	CH5N10W	782.038	4.43667	426.213	426.697	64.421	353.625	79.7855	17.7319	100.052	15.3523	37.013	2.0749	9.53085	2.06664
CH5N10W 8	CH5N10W	390.531	4.70419	168.725	110.121	21.9465	115.572	25.9256	5.61204	34.2671	5.52923	13.3636	2.05526	10.4046	2.19696
CH5N10W 9	CH5N10W	385.23	5.23911	175.494	111.876	23.0818	124.127	25.8934	5.93531	36.1395	5.5822	13.0124	1.75682	10.5654	2.3018
CH5N6 1	CH5N6	148.031	8.91217	49.8869	119.523	16.9756	97.1848	24.902	5.9079	35.9455	5.41326	17.1342	4.83112	22.1879	5.8163
CH5N6 2	CH5N6	171.939	9.76824	58.7268	128.832	20.5098	115.34	30.0416	6.92038	44.208	6.52718	19.1471	5.50994	27.1323	6.59039
CH5N6 3	CH5N6	163.826	9.58488	54.9093	120.688	18.6697	107.138	26.8262	6.34372	39.2948	5.94821	17.349	5.15298	24.9139	6.29744
CH5N6 4	CH5N6	155.844	9.33584	57.2279	130.381	18.9707	99.2628	26.1771	5.68144	28.5072	5.45203	15.87	4.99179	27.2454	6.58658
CH5N6 5	CH5N6	165.294	9.36609	64.4287	143.003	20.7996	113.326	27.3629	6.34861	31.0509	5.6025	16.9292	5.20017	28.4133	7.00271
CH5N6 6	CH5N6	156.85	9.67982	59.9053	132.239	19.5132	105.952	25.6368	5.86375	29.9482	5.41186	15.5141	5.00332	25.6603	6.46259
CH5N6 7	CH5N6	161.176	9.31512	66.0745	148.702	20.8284	108.824	26.3134	5.99474	27.778	5.52466	16.5207	5.01897	29.2801	7.27035
CH5N6 8	CH5N6	142.324	8.51252	59.8866	133.158	18.9579	98.2086	23.1613	5.30189	24.4658	4.77647	14.5318	4.55299	24.7954	6.20798
CH5N6 9	CH5N6	189.518	11.2291	79.8111	172.412	24.757	130.276	31.205	6.86819	31.9852	6.31257	17.663	5.90788	34.2905	8.09045
CH5N7 1	CH5N7	210.351	11.0728	80.8136	166.38	24.8168	130.961	31.4289	7.44132	37.8263	7.01556	22.1796	6.17285	36.1818	9.47498
CH5N7 2	CH5N7	181.467	9.15262	67.6629	138.925	20.8104	109.583	27.0491	5.95362	32.514	5.43824	18.7545	6.05677	32.7302	8.08133
CH5N7 3	CH5N7	232.098	11.9578	87.9091	177.171	28.1324	143.046	38.0367	7.71699	42.3529	7.1021	24.5992	7.03244	41.5919	9.93991
CH5N7 4	CH5N7	403.83	19.5915	147.78	293	41.6882	244.897	65.0734	11.385	74.5909	13.534	41.3781	11.3478	75.2288	16.0411
CH5N7 6	CH5N7	283.046	14.2634	102.426	201.452	31.4716	167.911	43.5646	9.86661	50.425	9.58846	30.1904	9.32474	50.9314	12.2125
CH5N8 1	CH5N8	85.3539	1.14597	38.3792	39.6149	6.93914	38.1449	8.74355	1.86394	14.4793	1.34215	4.42336	1.46331	3.0826	0.686359
CH5N8 2	CH5N8	109.418	3.57422	53.5964	50.7943	9.34515	52.7729	12.717	2.90334	20.1316	2.31628	6.59792	2.37544	5.00995	0.35072
CH5N8 3	CH5N8	50.1399	2.31644	24.4974	28.0887	4.27408	24.6476	5.43962	1.10698	8.27672	0.901856	3.08824	1.72734	3.21929	0.535303
CH5N8 4	CH5N8	25.0399	4.7278	22.1954	28.1191	4.00728	21.3678	3.85995	0.743785	3.85842	0.654145	1.88372	3.49568	5.72471	0.338189
CH5N8 6	CH5N8	93.308	3.69059	50.9313	47.8923	7.9557	42.1004	9.3556	2.11619	12.2475	1.76727	4.96211	2.67676	4.60801	0.468224
CH5N8 7	CH5N8	58.4172	3.08719	33.3738	46.569	5.11462	26.0588	5.15915	1.19867	6.8767	1.05032	2.95449	2.10707	3.96148	0.548572
CH5N8 8	CH5N8	53.1077	3.03335	33.2907	38.1405	5.43362	26.5368	5.80229	1.15388	5.85859	1.00805	2.55509	1.95876	3.8562	0.629342
CH5N8 9	CH5N8	76.2897	3.33128	47.3629	44.183	6.93566	35.3901	8.10228	1.54056	9.75982	1.49361	6.1926	2.09318	4.55294	0.685006
CH5N9 1	CH5N9	157.188	7.73861	61.1938	197.743	20.7887	96.7884	25.3024	5.10954	27.3087	4.9204	15.4234	3.60806	26.6979	6.62644
CH5N9 2	CH5N9	164.583	7.7082	63.5962	138.768	21.5109	100.063	25.5991	5.75237	27.8848	5.4877	16.2393	4.14657	27.2984	6.86396
CH5N9 3	CH5N9	120.311	6.59482	49.8518	114.235	16.5793	79.5115	19.7008	4.78586	21.4575	3.83975	11.9492	3.53326	21.0068	5.88965
CH5N9 4	CH5N9	134.407	7.60971	52.5187	128.404	17.563	84.5382	21.1342	5.03751	23.4485	4.22148	13.7922	3.37301	23.9589	6.83522
CH5N9 5	CH5N9	130.394	7.27335	51.584	116.679	16.616	81.3151	20.0055	4.57875	23.7211	4.07127	13.214	3.84719	23.6404	6.29927
CH5N9 6	CH5N9	154.677	6.94451	60.4405	129.138	19.0522	94.109	23.3235	5.27619	27.7631	4.72662	14.3398	4.22714	27.3461	6.09683
CH5N9 7	CH5N9	115.808	6.46835	48.3263	107.876	15.5235	74.0157	18.9354	4.08529	19.4972	3.51987	11.8571	3.14534	19.7569	5.2025
CH5N9 8	CH5N9	141.106	7.65392	53.8009	118.507	17.1186	86.2672	21.2839	4.83655	23.8863	4.203	14.4262	3.20052	23.2708	5.92439
CH5S96 1	CH5S96	223.277	8.07983	49.1823	61.0043	10.9345	65.0586	15.3745	4.26994	28.1337	3.5323	12.8211	4.55429	7.11789	2.12457
CH5S96 2	CH5S96	224.799	7.83565	53.4773	67.9186	12.085	68.8218	17.6342	4.07918	29.0896	3.97764	13.5041	4.49929	7.42662	2.26994
CH5S96 3	CH5S96	215.95	7.8052	51.8342	65.8488	11.5354	67.4988	17.2087	4.10451	28.2452	3.66263	12.53	3.96727	7.15506	2.21038
CH5S96 4	CH5S96	254.871	5.78222	64.9751	86.0421	13.953	76.8706	18.6789	4.5884	24.8468	3.91124	13.502	4.89303	8.76561	2.71403
CH5S96 5	CH5S96	230.88	5.80604	58.2238	78.9744	12.4198	69.5234	16.4097	4.11802	22.7919	3.45357	12.3466	4.14211	7.47972	2.50869
CH5S96 6	CH5S96	239.525	8.73119	62.4634	80.2698	12.5254	72.0796	16.9412	4.12786	22.8998	3.43705	12.9116	3.80483	8.41029	2.5394
CH6N1 1	CH6N1	236.882	13.7181	79.1818	179.389	28.1053	161.368	43.2274	10.3983	63.7636	9.00722	28.7329	7.49697	35.8021	10.4889
CH6N1 10	CH6N1	265.671	8.21436	97.1816	247.939	34.1137	181.36	43.089	10.4852	43.4324	9.45764	29.1804	6.96048	44.318	16.7067
CH6N1 11	CH6N1	227.765	8.57015	83.2542	206.427	27.8168	149.013	35.2357	9.09452	36.7019	8.00054	25.3725	7.11886	42.3162	15.3461
CH6N1 12	CH6N1	245.143	11.3214	92.0489	257.025	32.0023	167.286	39.7217	9.91186	40.8611	8.60841	26.7022	6.28882	41.0396	17.1514
CH6N1 2	CH6N1	228.751	13.0507	75.9247	167.994	27.0582	155.329	40.8183	9.96195	59.8204	8.78798	27.0545	7.54851	34.329	10.1051
CH6N1 3	CH6N1	142.286	10.2931	54.7473	116.874	18.2841	103.104	26.2043	6.27364	38.8617	5.61883	16.7947	6.20747	25.1066	6.7611
CH6N1 4	CH6N1	225.851	14.1043	86.7604	203.069	29.0072	161.412	39.5851	9.4337	48.8304	7.9579	25.7368	6.99632	37.5675	11.1987
CH6N1 5	CH6N1	321.786	16.5708	93.9077	229.828	33.9162	192.74	50.0495	12.0914	60.4672	11.3746	37.0284	8.45556	49.2141	16.3213
CH6N1 6	CH6N1	316.34	15.8981	94.8318	232.081	35.9944	193.313	50.3839	11.9211	62.1246	11.2452	36.1996	7.99495	49.0245	16.3873
CH6N1 7	CH6N1	267.815	11.0785	90.4412	240.219	32.6909	177.284	42.9933	10.6914	47.8645	9.46756	29.4503	7.0697	41.8096	15.9854
CH6N1 8	CH6N1	240.605	12.1089	86.5959	244.97	31.6995	165.692	39.91	10.0736	43.07	8.57831	27.1433	5.918	39.8091	18.036
CH6N1 9	CH6N1	248.972	12.6478	87.5414	253.427	32.7472	174.473	42.4344	10.8432	46.0844	9.10653	29.0217	6.5862	42.8115	18.4921
CH6N2 1	CH6N2	441.352	19.5718	148.027	352.554	56.8778	291.423	66.4862	14.0349	73.5013	13.0783	43.3109	7.78439	55.328	15.093
CH6N2 2	CH6N2	353.043	18.6078	120.583	296.585	44.8451	234.266	54.1478	11.7077	60.0452	10.2512	34.9444	7.42124	44.9841	13.367
CH6N2 3	CH6N2	199.195	12.9775	80.3754	171.736	25.8279	133.981	30.6802	7.25579	33.7471	6.06659	19.6299	6.35508	31.5106	7.18394
CH6N2 4	CH6N2	337.541	16.0585	125.095	267.301	42.0056	202.977	49.1487	12.344	63.2073	10.1906	31.9256	9.87844	49.1451	11.3889
CH6N2 5	CH6N2	288.667	14.5395	104.635	235.427	35.0378	181.028	44.4141	9.27152	46.4327	8.79203	28.7812	6.56417	37.9094	9.82836
CH6N2 6	CH6N2	350.49	16.7532	122.297	279.854	42.9822	220.942	52.6086	12.1392	61.5752	10.5137	33.9311	7.48289	48.0177	12.367
CH6N2 7	CH6N2	404.243	18.7439	147.873	341.456	49.8238	262.766	61.115	14.9575	62.1961	12.1728	36.712	8.2342	52.7734	14.178
CH6N2 8	CH6N2	582.124	22.453	192.191	429.906	66.4999	329.305	81.6404	17.9814	79.1686	19.6671	54.5258	10.8785	91.1551	19.29
CH6N2 9	CH6N2	596.35	23.1268	205.179	451.582	72.0866	354.712	96.0252	18.576	102.062	17.6126	53.9108	10.364	80.5909	19.5125
CH6N3 1	CH6N3	237.282	10.0793	60.4635	128.873	20.7953	119.511	32.8687	7.90303	52.7969	8.16281	25.8805	5.25193	26.8591	6.28073
CH6N3 10	CH6N3	239.501	11.3326	85.3183	186.345	26.0094	134.517	32.7872	7.40278	33.2822	7.27336	23.6015	6.0884	38.3231	8.84876
CH6N3 11	CH6N3	224.6	9.40594	78.4287	171.929	23.3799	122.622	29.7774	6.89116	30.4482	6.57856	21.6609	4.97491	32.8281	7.23193
CH6N3 12	CH6N3	231.723	9.94538	76.9583	169.91	23.5642	124.024	30.5405	6.92511	29.7397	6.58649	21.1022	5.05887	35.6958	7.45718
CH6N3 2	CH6N3	248.552	11.7025	66.9171	139.091	23.4806	135.188	35.2506	8.77119	57.7935	8.51263	27.7438	5.76159	30.0767	7.00299
CH6N3 3	CH6N3	227.509	9.06283	58.9196	124.799	19.7695	115.622	31.1973	7.84549	50.4562	7.83597	25.5888	5.09192	25.6616	6.04241
CH6N3 4	CH6N3	234.323	10.1275	67.3982	144.68	21.5448	119.931	30.2694	7.16619	38.0268	7.02121	22.818	5.43251	27.8453	6.66905
CH6N3 5	CH6N3	231.082	10.6833	69.4983	150.052	22.3151	121.976	31.1136	7.20334	39.1347	7.07802	22.1364	5.39083	30.017	7.069
CH6N3 6	CH6N3	229.465	9.94182	67.2874	150.383	21.7299	119.789	29.7256	6.88144	37.504	7.19217	23.4212	5.55658	30.3711	7.059
CH6N3 7	CH6N3	255.062	11.2227	85.6277	186.213	26.5392	141.474	34.8232	8.03028	37.9883	7.8629	25.1236	5.95912	36.8492	8.44702
CH6N3 8	CH6N3	234.823	10.5633	76.0402	165.307	23.8746	126.192	30.5252	7.102	34.2488	7.18363	23.8371	5.57555	32.3922	7.5112
CH6N3 9	CH6N3	223.36	9.27052	70.0555	154.745	22.6066	120.12	29.6401	6.68989	31.7275	6.75346	21.5497	5.01341	30.6053	6.88826
CH6S101 1	CH6S101	278.676	18.9347	106.189	170.405	23.1003	108.205	25.7133	6.02849	28.1996	4.33906	17.2588	8.11832	18.5261	7.79409
CH6S101 10	CH6S101	354.603	21.5922	158.549	188.924	26.6644	135.115	28.9782	7.01952	31.937	5.2456	24.8237	10.4381	22.3777	7.67522
CH6S101 11	CH6S101	364.985	24.1594	138.411	225.048	29.5572	146.285	33.1099	6.75959	37.4037	5.89152	22.1452	10.14	23.1843	9.26273
CH6S101 12	CH6S101	404.374	29.1247	155.653	253.494	34.9623	162.023	29.6957	7.09682	34.1273	6.489	25.2017	11.3262	28.8896	12.3724
CH6S101 2	CH6S101	349.202	22.2833	130.093	223.309	28.1115	137.941	33.2228	7.50329	36.0169	5.9194	21.6622	9.5778	23.0108	9.07232
CH6S101 3	CH6S101	325.507	21.5854	118.611	184.418	25.2747	123.575	27.2685	6.47586	33.4414	5.38998	19.1282	8.89176	20.8592	7.95823
CH6S101 4	CH6S101	488.272	30.2421	180.497	280.793	38.8722	185.263	46.138	8.77192	52.6302	7.58641	33.5922	15.7898	34.6555	13.8477
CH6S101 5	CH6S101	319.74	22.9653	127.041	225.698	27.0773	127.784	28.83	7.31557	30.9782	5.51158	19.5704	10.4707	22.0177	9.21482
CH6S101 6	CH6S101	344.758	21.8429	135.857	230.817	29.2116	138.75	31.3734	7.60835	32.7158	5.82444	20.2877	10.5223	24.3031	11.154
CH6S101 8	CH6S101	259.733	19.6259	100.068	172.247	21.6574	101.316	23.5252	5.8393	26.093	4.29235	15.9451	7.64334	18.5395	8.03237
CH6S101 9	CH6S101	267.652	19.5093	104.304	178.953	23.9846	110.518	25.9724	6.11277	28.5795	4.71226	16.8641	8.37599	18.949	8.10626
CH6S102 1	CH6S102	399.821	10.0776	128.372	191.593	24.1476	127.179	29.9806	7.125	39.9739	6.64105	22.262	5.66423	13.4851	6.08092
CH6S102 10	CH6S102	325.148	8.64506	102.056	144.763	23.4861	103.038	24.4897	5.5743	29.703	4.7568	18.2081	4.47054	10.7415	6.17486
CH6S102 11	CH6S102	336.082	8.74823	100.713	166.259	19.3329	96.5708	22.8093	6.13985	32.3442	5.27802	19.229	5.00303	10.0881	4.5534
CH6S102 12	CH6S102	368.772	9.22897	113.051	159.52	22.2137	109.88	27.4877	6.30621	33.2184	5.62164	19.6874	5.63512	11.7846	5.21219
CH6S102 2	CH6S102	380.641	8.77296	127.228	193.667	25.0822	128.132	30.3329	7.15052	35.3274	6.25569	21.2504	4.64207	11.9132	5.6676
CH6S102 3	CH6S102	396.71	9.07709	127.813	188.705	24.1085	120.732	29.2944	6.7468	37.7275	6.10691	22.8388	4.90491	11.4413	5.80449
CH6S102 4	CH6S102	450.039	10.7965	148.153	233.405	30.7524	144.353	37.8985	8.44416	43.236	7.23721	22.804	6.17443	13.8722	6.59687
CH6S102 5	CH6S102	436.02	10.8123	142.618	216.657	27.5608	139.204	32.4344	8.50996	42.3606	6.98972	22.6702	5.46471	13.6255	6.42725
CH6S102 6	CH6S102	378.054	9.71453	123.285	184.278	23.079	119.355	28.8289	7.05626	37.223	5.87929	19.2436	5.14033	11.233	5.19593
CH6S102 7	CH6S102	475.853	12.1435	157.331	231.756	30.483	151.524	35.257	9.02921	45.2989	7.9656	24.5349	5.86501	14.5346	6.91996
CH6S102 8	CH6S102	456.793	11.4113	145.547	221.403	28.0812	143.614	33.0023	7.91223	45.0782	6.89936	23.9964	5.80996	13.7127	6.33737
CH6S102 9	CH6S102	425.513	10.9834	133.533	201.775	26.0686	125.542	32.9407	7.56023	41.4056	6.5566	22.5759	5.21001	12.3995	5.83993
CHABS41 1	CHABS41	411.807	5.36683	26.7031	70.551	10.8938	102.526	54.1938	15.5978	85.3775	14.3964	30.384	3.15853	5.84382	14.6475
CHABS41 2	CHABS41	352.293	4.73931	25.1929	65.7755	10.6644	91.7196	50.3325	12.573	78.366	11.5838	28.4571	2.33329	4.81563	11.8474
CHABS41 3	CHABS41	426.238	5.21711	31.7654	80.2886	12.3982	109.992	58.6641	14.6604	88.739	14.6641	33.6625	3.09116	6.88272	15.9406
CHABS41 4	CHABS41	453.344	5.62895	33.2409	82.2251	13.373	120.533	63.3618	16.1476	95.0814	13.9624	32.4035	3.52159	7.48275	14.5364
CHABS41 5	CHABS41	486.159	6.11036	35.9247	91.8085	14.3223	124.23	67.9297	16.3464	105.781	16.3542	34.8573	2.938	8.01023	16.1395
CHABS41 6	CHABS41	412.632	5.6253	31.6577	80.2856	11.9492	113.881	52.9827	14.6979	77.8107	13.3597	28.4715	3.00422	6.48434	12.5603
CHABS41 7	CHABS41	445.26	6.54492	32.5143	80.9996	12.5041	111.729	62.9078	15.328	93.8239	13.541	33.3097	3.48544	6.97095	14.1204
CHABS41 8	CHABS41	388.102	6.67305	29.1095	75.3726	11.178	95.4425	50.2322	11.9165	80.5752	12.6286	31.128	3.76912	6.61426	15.2069
CHABS43 11	CHABS43	299.83	4.77206	22.7414	73.7158	11.6668	107.586	52.4371	14.0399	49.578	11.112	24.4188	2.76272	5.31929	14.04
CHABS43 12	CHABS43	291.058	5.23402	24.2519	84.3005	13.5646	114.313	55.6994	14.9059	48.4706	10.8939	24.3342	2.83429	5.40886	15.7603
CHABS43 2	CHABS43	337.564	5.07371	17.6366	59.0283	8.6599	88.6374	53.9871	15.4433	62.1452	12.7081	29.8667	2.7168	4.6426	14.1426
CHABS43 3	CHABS43	328.719	4.40115	16.0317	53.1906	8.22001	83.9403	50.5454	14.4592	57.0303	12.3026	28.5849	2.26925	4.30122	13.1809
CHABS43 4	CHABS43	348.217	5.35372	21.692	72.8719	9.58213	92.6171	54.7059	15.5522	55.8589	12.2474	27.624	3.08408	5.55276	15.8043
CHABS43 5	CHABS43	374.647	5.79882	21.9121	75.8722	9.98813	97.455	58.5716	16.8244	62.215	13.81	29.4273	2.66793	5.63035	18.4278
CHABS43 6	CHABS43	283.633	4.92212	19.2707	61.0535	8.39036	77.1148	43.3799	12.2263	47.5084	10.2237	22.9287	2.58479	4.53305	12.8164
CHABS43 7	CHABS43	362.868	5.22053	25.7402	79.6853	9.28178	87.2858	52.7807	15.123	56.0163	13.1976	29.5229	2.54434	5.95181	19.4413
CHABS43 8	CHABS43	343.815	5.17774	22.7773	77.5961	10.0513	93.2717	52.1268	14.7979	55.9768	12.4035	27.3645	2.58994	5.6463	18.0926
CHABS43 9	CHABS43	374.21	5.39997	22.6353	80.0257	10.0193	92.5887	54.9994	15.4097	58.1099	13.4248	29.4991	2.58	5.85131	18.6867
CHABS46 1	CHABS46	419.908	5.70741	29.5479	81.518	14.2084	123.45	62.0466	16.7134	82.5016	14.4888	32.4494	3.22251	6.94023	13.8829
CHABS46 2	CHABS46	393.316	5.25652	28.6304	81.422	14.2324	124.855	57.0331	16.3031	80.9787	13.5427	29.6419	3.16361	6.27115	14.2346
CHABS46 3	CHABS46	280.249	4.18471	20.3817	59.2341	9.66925	86.3014	43.541	11.6169	60.1016	9.91458	23.1593	2.17841	4.64107	10.3307
CHABS46 4	CHABS46	386.606	5.65856	28.5355	80.6148	13.5585	118.428	58.52	15.6957	81.295	13.4232	30.558	3.37065	6.54002	13.7069
CHABS46 5	CHABS46	466.738	6.74835	29.2265	85.1436	15.4143	139.41	66.976	17.8799	95.2094	15.6309	32.4997	2.93308	6.62684	15.4037
CHABS46 6	CHABS46	415.006	5.72162	30.9272	80.6499	13.952	116.967	61.669	15.4323	89.3285	14.879	34.6679	3.47002	7.0766	14.1513
CHABS47 1	CHABS47	747.275	12.1636	55.9448	158.13	26.2603	229.58	117.083	31.2727	160.547	26.036	63.1672	6.07695	12.4687	26.6664
CHABS47 2	CHABS47	677.765	11.2327	51.3908	156.358	23.8762	201.605	101.461	27.3547	136.343	21.8727	54.4302	5.19491	11.3198	24.7801
CHABS47 3	CHABS47	644.263	11.6113	50.0728	159.727	23.9689	202.418	99.2774	28.0015	133.048	21.072	52.0323	5.05303	11.2084	28.2664
CHABS47 4	CHABS47	588.666	11.0838	48.1087	162.367	23.6886	192.388	94.9578	27.1366	123.961	20.004	47.085	4.18974	10.1286	28.1765
CHABS47 5	CHABS47	958.443	14.3023	66.9422	190.329	30.8728	273.858	144.083	37.5722	198.93	32.266	72.9694	7.28265	15.4927	30.6079
CHABS51 1	CHABS51	635.835	7.06219	49.3791	178.114	20.6421	167.402	96.5076	26.4784	135.887	22.3988	47.462	4.75365	11.2529	34.9613
CHABS51 2	CHABS51	569.903	6.82533	43.8099	161.801	18.182	149.471	84.5809	23.9899	121.138	19.2262	43.8398	3.9557	9.67784	37.4005
CHABS51 3	CHABS51	674.485	8.30901	51.0493	186.6	25.779	178.812	99.965	29.7308	143.579	22.7975	50.2631	5.86654	11.8168	35.9173
CHABS51 4	CHABS51	729.255	9.8053	55.442	177.971	21.8345	187.077	105.155	29.0923	151.606	24.3396	54.7699	6.2298	13.8097	34.4356
CHABS51 5	CHABS51	823.41	3.69528	57.4693	198.708	23.2216	196.226	114.395	33.2922	172.034	27.7512	62.2308	6.47	15.0925	41.5249
CHABS51 6	CHABS51	812.594	12.139	57.0235	188.887	23.0359	200.181	113.724	32.3422	172.852	27.982	61.2862	6.12059	14.2358	39.4438
CHABS53 1	CHABS53	880.816	10.8364	58.6466	165.737	26.2255	225.915	123.251	33.8923	188.521	30.573	75.9328	5.48763	13.2434	36.8442
CHABS53 2	CHABS53	950.667	11.6083	62.5949	163.81	26.5093	234.43	130.338	33.9913	201.852	32.2606	81.258	6.19322	14.507	35.3991
CHABS53 3	CHABS53	1019.21	11.3302	68.9368	174.237	28.4926	252.904	137.811	37.2052	216.553	34.6736	83.4473	6.41991	14.5414	38.2203
CHABS53 4	CHABS53	790.471	10.729	55.3952	153.698	23.8429	203.111	108.967	30.1316	166.174	26.4276	63.2014	4.84696	11.53	36.5762
CHABS53 5	CHABS53	859.609	10.1079	57.1666	157.182	24.7369	217.032	111.588	31.9572	170.276	27.5964	65.4729	5.49471	11.8586	31.7282
CHABS53 6	CHABS53	1075.73	12.9734	70.376	177.475	31.2049	249.998	139.568	36.1534	210.278	34.1166	86.1664	7.13325	14.631	35.72
CHABS53 7	CHABS53	763.801	5.6804	56.4289	149.392	22.7795	185.922	105.003	31.3174	157.349	24.6282	56.6708	3.44774	9.87981	42.52
CHABS53 8	CHABS53	874.568	5.7775	66.5589	155.985	24.2594	202.9	115.23	34.5481	181.6	27.588	67.0575	3.98169	11.1297	46.5863
CHABS53 9	CHABS53	914.962	11.1838	59.5416	158.996	24.3781	213.896	120.876	32.0901	172.021	28.3467	62.6799	5.50204	11.2076	33.7617
CHABS55 1	CHABS55	620.577	7.67348	42.1876	111.102	17.8215	157.664	88.9912	23.743	128.067	20.4834	51.0035	4.24726	9.61592	22.4416
CHABS55 10	CHABS55	514.017	6.93306	34.8913	93.8305	15.219	135.84	68.3363	17.8291	103.629	16.0542	38.1012	3.06713	6.66114	15.9704
CHABS55 11	CHABS55	568.545	7.01683	38.3147	105.629	16.9107	146.364	81.2508	19.4867	111.535	17.283	40.7408	3.2706	7.80414	17.1678
CHABS55 12	CHABS55	546.565	7.2054	35.9588	100.354	15.713	141.368	74.7959	18.8962	104.862	17.0634	36.8182	2.88948	6.74143	17.0353
CHABS55 2	CHABS55	542.341	6.71544	37.0371	99.0445	16.3168	146.214	75.4382	19.7904	110.982	17.5989	43.4167	3.56668	7.88912	19.1215
CHABS55 3	CHABS55	557.805	7.19902	39.0687	105.804	16.8849	150.066	80.1103	21.3216	113.338	18.0347	42.553	3.44203	8.13884	19.5738
CHABS55 4	CHABS55	415.305	6.27384	27.6604	74.8641	12.0652	106.168	55.4439	13.9946	81.4365	13.2265	32.1973	2.91497	5.8531	13.077
CHABS55 5	CHABS55	563.881	7.59774	38.2053	101.911	15.9306	141.115	74.1202	20.1074	109.368	17.8496	42.1687	4.26199	7.94699	18.9801
CHABS55 6	CHABS55	557.883	7.88001	38.7251	105.732	16.411	143.494	77.4893	20.4092	111.267	17.252	41.6232	4.02018	8.51122	19.4969
CHABS55 7	CHABS55	585.753	7.04416	38.0529	103.279	16.1588	147.447	78.437	20.4435	115.116	18.792	45.8284	3.66812	8.33258	19.3251
CHABS55 8	CHABS55	521.661	6.59884	34.4979	95.0899	14.7281	129.336	69.1719	18.1591	100.87	16.6796	39.7733	3.01184	7.03195	17.7369
CHABS55 9	CHABS55	560.38	7.34493	35.2217	100.623	16.0355	141.418	72.6607	20.0942	105.217	17.1453	40.8013	3.29125	7.56275	18.0053
CHABS58 1	CHABS58	595.534	7.61533	40.4904	114.285	17.4516	154.929	83.3666	23.2655	125.773	19.9164	48.4721	3.41487	9.45315	23.4013
CHABS58 10	CHABS58	355.233	5.84983	27.3491	90.5447	11.5679	93.3898	51.2817	13.9331	75.0696	11.9508	25.0434	3.24202	6.60812	16.9742
CHABS58 2	CHABS58	603.768	7.23899	37.7273	109.084	17.124	154.545	82.782	22.4529	124.744	20.9105	51.1179	4.013	9.19766	22.9006
CHABS58 3	CHABS58	584.947	7.41577	38.0509	109.559	16.1048	151.205	84.3376	22.7159	119.95	19.9478	48.799	3.70378	9.56668	22.1638
CHABS58 4	CHABS58	562.373	7.07973	35.6717	107.293	16.5188	142.292	77.4755	20.9713	110.993	19.0334	43.3229	3.71137	8.70709	22.3252
CHABS58 5	CHABS58	619.246	8.00935	40.9594	121.858	17.9752	161.744	90.4241	23.7071	126.587	21.0016	49.7872	4.32893	10.4069	23.079
CHABS58 6	CHABS58	564.974	6.74934	35.8077	105.805	15.9891	141.875	77.6406	21.0762	119.574	19.6709	45.9768	3.2847	8.87526	20.3487
CHABS58 7	CHABS58	512.867	6.74363	34.5078	105.79	15.3405	134.997	72.2917	20.2185	106.505	17.6956	42.5722	3.79787	8.63087	22.49
CHABS58 8	CHABS58	602.573	6.93634	35.2719	105.141	15.5433	145.045	79.8687	22.2182	118.098	19.5976	49.0181	3.22194	9.18189	21.1866
CHABS58 9	CHABS58	610.139	6.83483	37.202	112.041	17.0107	158.886	86.8467	23.5131	124.67	21.206	50.5966	3.57156	9.53512	22.4155
CHABS61 1	CHABS61	37.6022	8.34935	40.5501	67.7599	7.15579	31.5784	7.45277	1.51781	5.28009	1.21051	3.9334	5.28232	13.1915	2.48937
CHABS61 2	CHABS61	28.8966	8.25537	34.0217	76.4482	9.04922	34.0908	10.479	1.40769	5.95473	1.04848	3.01986	4.3573	12.9278	3.31412
CHABS61 3	CHABS61	40.2532	9.6834	46.8091	90.7469	10.3185	43.2162	9.13866	4.29362	9.94655	1.5492	4.38254	5.98144	19.0577	4.2789
CHABS61 4	CHABS61	47.9954	7.61668	57.8291	121.095	12.7738	55.5032	13.1107	2.45217	10.6602	1.88658	5.16657	3.79431	21.952	5.45555
CHABS61 5	CHABS61	40.3414	8.94839	46.1588	89.5542	9.39939	44.2901	9.8222	2.07509	7.93244	1.4604	4.65551	5.35558	17.4933	3.63467
CHABS61 6	CHABS61	40.6492	9.21614	44.0268	82.2058	9.39961	42.9813	7.67772	1.53436	7.55969	1.41202	4.11313	5.89583	16.291	3.8476
CHABS61 7	CHABS61	49.8919	11.8989	62.1512	116.578	14.0764	59.7501	11.9727	2.40959	12.5199	1.68381	5.3693	7.21448	24.9591	5.03738
CHABS61 8	CHABS61	37.6178	9.58913	45.4462	85.4702	8.90087	46.2813	9.22666	1.38293	7.6351	0.876329	4.02136	7.05433	18.3977	8.00484
CHABS61 9	CHABS61	41.5314	11.0919	74.6015	224.767	11.8922	63.0943	9.68748	0.247318	13.0667	0	4.09026	6.04228	23.9202	3.34439
CHABS62 1	CHABS62	610.786	8.42882	44.0617	129.478	18.8605	159.373	83.6938	22.6034	129.174	20.5169	49.6937	4.03845	9.85557	22.7815
CHABS62 2	CHABS62	621.946	9.52768	47.2731	136.663	19.7271	162.842	88.6059	24.4209	132.33	20.3306	49.4511	4.62557	10.9226	23.5598
CHABS62 3	CHABS62	591.066	8.46254	45.4573	131.013	17.9475	154.128	80.453	21.6754	125.253	19.4319	46.0655	3.75947	9.38845	23.002
CHABS62 4	CHABS62	491.5	7.48867	38.2791	111.725	15.3455	132.567	74.1227	18.562	105.488	16.7348	35.6255	3.19805	7.90924	18.9459
CHABS62 5	CHABS62	466.884	7.07915	35.5566	105.008	14.2774	124.997	67.9431	17.5347	99.6884	15.1812	33.8264	3.36178	7.47445	17.4624
CHABS62 6	CHABS62	461.61	7.448	34.5857	101.335	13.3724	117.956	63.816	17.6652	95.282	14.3234	32.8399	3.43638	6.84947	17.0869
CHABS62 7	CHABS62	414.751	5.96759	32.0542	94.1257	13.0762	110.334	60.6905	15.6898	89.817	13.4585	30.6156	2.82223	7.02318	16.558
CHABS62 8	CHABS62	418.836	6.54358	31.8235	95.786	13.3309	111.785	61.8371	16.4606	88.9661	13.8386	30.8772	3.23911	6.96336	16.2457
CHABS62 9	CHABS62	434.926	7.08419	33.1157	101.244	13.73	121.204	69.2073	17.3072	95.5024	13.8187	30.242	3.47492	6.98758	17.8059
CHABS63 1	CHABS63	614.924	3.7576	50.0615	194.734	24.4788	205.873	107.465	30.9643	133.997	21.3258	51.8309	3.41577	9.57873	44.6324
CHABS63 2	CHABS63	754.582	3.44462	57.5386	193.927	28.3398	238.983	123.987	35.5402	161.614	25.7332	63.9296	4.4792	11.568	44.0992
CHABS63 3	CHABS63	734.518	4.9148	56.1902	208.162	28.0687	236.376	117.012	34.8308	153.349	24.932	60.0607	3.68448	10.9421	50.358
CHABS63 4	CHABS63	763.284	7.09654	57.6148	214.635	29.3616	240.272	121.629	35.5413	155.957	25.3867	60.7159	4.16146	10.7341	49.1716
CHABS63 5	CHABS63	844.073	6.54822	62.1701	224.242	30.1009	263.721	133.365	39.48	165.515	28.1934	66.6248	4.20126	12.4609	46.8448
CHABS63 6	CHABS63	925.249	5.54989	67.0905	213.564	32.572	273.612	145.86	40.4034	192.593	30.2113	74.5562	4.52031	12.8191	46.3224
CHABS63 7	CHABS63	1112.31	4.38079	78.9887	219.734	34.8409	321.659	168.728	40.4191	222.635	32.8488	81.7414	5.35062	12.9818	48.9545
CHABS63 8	CHABS63	810.687	4.72082	59.2182	192.464	28.0314	240.397	122.697	37.09	166.819	26.4428	62.4364	4.47055	10.622	44.023
CHABS63 9	CHABS63	899.217	4.71634	61.8189	193.94	29.8926	262.572	133.409	37.2811	181.669	29.3164	65.3456	4.91083	11.7479	38.3487
TN3P1 1	TN3P1	327.412	17.6215	105.402	149.805	21.3259	127.869	24.4891	6.27115	31.3175	5.60086	23.5576	9.17966	21.3435	11.5564
TN3P1 2	TN3P1	371.751	18.5512	116.874	158.032	23.4638	115.888	23.8669	6.27653	34.175	6.39282	21.2946	9.40666	20.7977	10.5182
TN3P1 3	TN3P1	335.238	18.548	115.234	155.179	24.0635	108.566	26.8217	6.16447	31.2176	5.783	19.6752	10.8174	22.806	11.8613
TN3P2 1	TN3P2	317.463	26.2096	141.536	294.751	27.2918	136.957	31.0299	7.23353	33.2643	6.04898	15.9783	12.4013	28.0417	8.74833
TN3P2 2	TN3P2	458.872	25.3767	178.496	337.435	36.492	177.624	36.8807	8.91325	49.4932	8.09578	31.0644	14.9442	34.4976	11.6689
TN3P3 1	TN3P3	1163.29	18.0593	255.024	411.492	55.0138	268.136	68.2266	13.3742	85.5422	14.1533	52.1945	5.98419	25.2217	13.0929
TN3P3 2	TN3P3	1113.56	16.6216	272.906	376.322	52.9597	291.536	59.6577	14.8338	96.728	15.5578	56.7655	7.41603	29.6405	16.9302
TN3P3 4	TN3P3	647.126	10.6279	183.005	291.306	36.5062	168.603	38.4407	9.49382	52.8726	8.72715	29.574	3.09077	15.9717	11.8466
TN3P3 5	TN3P3	1324.2	20.0897	295.428	412.915	58.2889	315.122	70.2048	16.6052	110.03	17.4598	57.571	7.3802	31.4309	14.447
TN3P3 6	TN3P3	580.47	11.5699	144.527	202.788	31.9459	159.551	34.5676	9.54282	30.6649	8.54028	26.403	5.88811	15.0541	9.95102
TN3P3 8	TN3P3	1175.02	16.2127	289.193	397.017	58.8844	315.09	77.8102	16.6119	85.6935	15.5711	51.7954	6.65824	30.1292	14.3531
TN3P4 1	TN3P4	594.778	12.5749	149.36	180.49	31.5702	138.02	32.3773	8.86852	47.706	8.52876	27.1932	5.07337	18.1835	8.32263
TN3P4 2	TN3P4	518.715	10.87	133.219	168.344	23.8742	124.073	31.045	8.53651	41.7634	7.77411	26.7349	3.40789	16.1433	10.2999
TN3P4 3	TN3P4	518.92	10.2729	118.663	162.763	23.6253	116.628	32.4285	8.4845	41.08	7.0563	26.2147	3.61852	15.0996	9.95006
TN3P4 4	TN3P4	763.505	10.5694	204.04	230.458	46.3944	204.787	54.4474	11.868	55.8092	11.9727	32.86	3.84556	9.47576	4.74149
TN3P4 5	TN3P4	747.208	9.18099	261.425	288.08	54.6175	270.454	62.3845	12.0308	69.4428	12.0989	34.4583	7.38173	12.884	4.85414
TN3P4 6	TN3P4	141.961	8.09962	53.1703	70.1332	10.8423	48.3676	12.7143	2.76936	13.454	2.56312	6.78916	4.5288	8.80998	1.74259
TN4P1 1	TN4P1	597.358	9.47259	136.357	159.052	24.949	131.285	32.4354	7.87811	44.5426	8.15825	29.0344	3.42793	16.0709	6.74155
TN4P1 2	TN4P1	606.99	10.2036	143.693	166.852	26.5586	143.471	35.666	8.16701	48.636	8.23896	27.262	3.89077	16.5091	7.6846
TN4P1 3	TN4P1	586.949	10.1304	143.679	171.022	25.7744	137.485	38.6388	9.95383	44.8364	7.40898	27.7324	4.1667	16.6578	6.60158
TN4P1 4	TN4P1	780.428	10.6869	184.922	197.057	32.7262	178.63	41.9257	9.83077	59.1847	10.2803	33.5068	3.7519	19.9634	8.77582
TN4P1 5	TN4P1	817.078	10.4314	193.017	193.994	33.8373	177.917	47.4799	11.435	72.4743	9.84509	36.8345	2.97552	20.473	9.00421
TN4P1 6	TN4P1	805.583	13.9271	202.415	211.808	34.9013	176.807	42.783	11.8966	63.8389	10.2545	43.5795	5.4139	22.7945	11.0628
TN4P2 1	TN4P2	516.57	11.9293	164.137	421.155	33.459	140.598	43.0968	8.94319	40.7652	11.0368	24.6887	5.63696	14.6355	7.23736
TN4P2 2	TN4P2	461.192	11.2789	174.047	419.788	31.7714	150.758	39.2118	8.73683	40.0066	9.64869	21.8025	3.83166	11.5129	4.91113
TN4P2 3	TN4P2	553.074	13.6574	170.78	411.948	34.8951	175.746	39.988	9.28794	48.8752	10.8973	25.9591	6.0364	12.091	5.63176
TN4P2 4	TN4P2	394.611	12.2114	143.898	306.904	25.862	131.023	30.8836	6.91765	29.1299	8.27277	19.4388	5.12971	16.1671	6.16027
TN4P2 5	TN4P2	518.057	12.1879	160.037	367.822	26.2678	139.658	39.7413	8.39431	38.9386	8.26055	20.0563	5.4411	16.0507	9.49469
TN4P2 6	TN4P2	404.355	10.1204	146.155	357.767	27.0752	131.057	28.1094	6.84282	30.2686	7.59909	17.4709	5.20784	9.65461	6.68986
TN4P3 1	TN4P3	399.159	28.1443	146.544	237.186	31.7529	144.158	32.2045	8.30438	53.3456	5.54777	27.2571	13.0069	29.8534	10.3886
TN4P3 2	TN4P3	434.984	30.5968	167.645	270.666	35.027	163.859	39.2553	12.262	50.0681	6.31343	29.5295	15.1664	36.0052	11.065
TN4P3 3	TN4P3	417.577	27.8216	153.059	243.529	31.4349	152.546	35.662	7.9785	38.9791	7.54953	22.188	14.232	32.5968	10.2208
TN4P3 4	TN4P3	357.265	25.6333	131.372	231.369	28.0566	129.906	35.726	7.21997	32.0727	7.3467	17.6141	8.6466	26.9296	10.16
TN4P3 5	TN4P3	404.378	28.8834	157.085	247.614	29.4736	151.58	39.4986	8.32047	44.0993	6.9012	23.7159	13.8615	32.9666	9.57644
TN4P3 6	TN4P3	250.345	17.847	100.58	183.99	21.5384	95.7317	19.6439	4.02031	25.9119	5.68704	16.9094	8.91594	20.8009	11.2542
TN4P3 7	TN4P3	339.682	21.9713	136.746	220.771	28.9924	135.872	29.5214	7.20323	36.0671	5.54476	21.0783	10.1402	25.5823	8.54559
TN4P3 8	TN4P3	545.929	37.2052	218.661	337.659	41.4721	214.15	48.3853	11.3532	57.4481	11.3481	31.4746	14.0168	40.2083	15.6042
TN4P4 1	TN4P4	439.617	6.03842	83.2392	88.2972	15.9131	78.4039	17.7623	6.39524	42.5788	5.87244	16.1618	3.75616	4.37172	2.03103
TN4P4 4	TN4P4	619.456	9.83439	135.443	165.529	25.406	135.778	32.1656	8.81805	46.4928	8.6843	28.2498	5.19013	15.6883	6.13839
TN4P4 5	TN4P4	574.165	9.12428	125.851	146.101	22.285	119.413	30.2719	8.80803	46.4676	7.44525	24.4163	4.28611	13.8221	5.01733
TN4P4 6	TN4P4	648.873	10.4582	138.677	153.701	26.8562	139.459	31.3705	9.62262	53.6287	7.62249	26.5186	3.88405	14.6515	6.26375
TN5P1 1	TN5P1	63.4911	2.42604	15.6132	24.2206	3.33646	17.9325	4.68451	1.09043	7.13047	1.08664	3.56958	1.57368	2.70938	0.720434
TN5P1 2	TN5P1	29.9635	3.37808	10.7081	17.4268	2.32634	12.0025	2.88794	0.642129	4.20774	0.577441	1.93297	1.59696	2.49639	0.416019
TN5P1 3	TN5P1	27.137	1.60605	11.3654	16.7167	2.49942	12.7412	2.69514	0.714078	3.9148	0.67808	1.83577	1.01248	2.44879	0.437458
TN5P1 5	TN5P1	56.5743	2.64716	17.7857	28.1853	3.5691	20.0044	4.57287	1.02954	5.47096	0.969719	2.54063	1.70867	3.11943	0.767713
TN5P1 6	TN5P1	26.5479	1.743	12.7859	23.2119	3.09578	13.1558	2.86089	0.589322	3.94828	0.444477	0.374848	1.42961	2.88679	0.406479
TN5P2 1	TN5P2	413.542	14.2942	131.516	210.822	27.7498	141.456	32.5273	8.64048	35.3133	6.03059	22.5301	7.04484	17.5427	14.5155
TN5P2 3	TN5P2	312.957	11.585	90.6109	147.244	19.1587	94.6002	22.6987	5.59829	29.6012	5.02628	18.293	5.95473	14.8939	8.30361
TN5P2 4	TN5P2	364.645	12.884	110.215	184.953	22.8327	109.272	25.9433	6.44791	33.1205	5.50774	22.6728	6.96127	16.6149	9.50112
TN5P2 5	TN5P2	406.988	15.8567	116.998	192.101	22.6247	122.241	28.7252	7.3067	32.6117	6.04606	21.142	6.51378	20.0069	10.2365
TN5P2 6	TN5P2	359.555	13.1403	101.627	160.198	19.6616	108.876	24.0502	6.12397	28.2243	5.21027	19.5224	7.8208	16.3559	16.8823
TN5P3 1	TN5P3	533.123	25.1373	167.341	220.255	31.586	160.533	39.1247	8.0672	42.8673	7.8856	30.2529	12.3107	29.6738	12.3834
TN5P3 2	TN5P3	636.053	28.4324	198.362	267.504	38.0949	187.244	46.8375	9.87378	49.6538	9.05763	32.7259	15.3977	32.6597	14.954
TN5P3 3	TN5P3	422.362	18.9656	133.376	175.143	25.5249	131.959	30.9946	6.4412	36.9894	6.23822	23.7472	10.076	24.528	10.7095
TN5P3 4	TN5P3	667.84	29.4133	213.695	285.12	39.2256	200.023	47.5017	10.8976	61.5766	10.2373	39.959	16.6049	36.0377	15.3642
TN5P3 6	TN5P3	717.818	32.9134	229.277	302.479	44.3659	227.575	51.6603	11.7198	66.4218	10.7143	36.1095	14.2804	35.7246	16.5194
TN5P3 7	TN5P3	616	29.4484	196.94	266.713	39.1979	196.09	37.5738	8.98072	53.051	11.0233	32.0196	13.059	35.0214	14.9246
TN5P3 8	TN5P3	585.659	25.6764	163.487	270.132	37.8312	165.781	31.5917	7.66237	48.3295	8.01829	29.1433	13.0034	29.0068	15.9634
TN6P1 1	TN6P1	1350.43	10.7992	380.471	381.218	77.2215	376.403	94.4232	22.983	129.815	18.747	51.8785	6.90445	16.576	7.17612
TN6P1 4	TN6P1	1034.48	6.9342	308.926	316.27	60.3305	312.11	69.0586	17.4052	91.8628	14.6166	36.9518	6.18737	13.5003	6.46239
TN6P1 5	TN6P1	1421.04	1.83913	397.09	413.205	79.8919	416.331	97.3698	22.8159	123.851	18.9882	50.8011	5.03647	13.0144	8.3282
TN6P2 1	TN6P2	448.018	17.9323	142.141	290.296	30.4235	152.7	39.9086	9.80273	42.7976	10.2517	24.3214	7.18182	16.9252	6.98857
TN6P2 4	TN6P2	600.247	2.42756	200.188	471.107	43.4336	203.263	64.8788	13.6589	46.426	11.6653	33.9582	7.924	22.3924	10.7303
TN6P2 5	TN6P2	382.776	4.91989	138.995	264.672	27.2242	135.583	31.7899	7.72109	30.1883	6.98692	21.9904	5.71304	15.0472	7.9866
TN6P3 1	TN6P3	233.179	17.1599	67.6689	111.152	16.2558	78.3949	18.4137	8.896	22.4618	8.56412	18.0209	7.36635	15.792	6.39008
TN6P3 2	TN6P3	179.912	14.848	61.4321	89.7257	14.5126	59.6191	14.4625	5.91056	19.7228	4.2106	12.244	4.26266	11.5305	3.70488
TN6P3 4	TN6P3	197.242	14.5145	62.9881	97.0897	13.1004	65.8103	20.4996	3.70515	16.5652	3.92423	12.3863	6.07103	14.1681	4.26836
TN6P3 5	TN6P3	198.727	15.7665	68.3469	96.0156	12.1606	73.1049	18.0634	4.15273	16.4821	4.4609	9.91245	6.70182	16.0258	6.08217
TN6P3 6	TN6P3	185.522	12.6737	55.3826	87.6075	12.4157	58.136	14.5899	3.91591	12.6255	3.68423	13.29	4.38797	11.2382	4.23219
TN6P4 1	TN6P4	260.811	13.3212	78.7929	102.257	18.4452	84.6877	19.5838	6.1643	28.8724	6.49705	15.2797	5.01735	13	6.10639
TN6P4 2	TN6P4	178.076	8.18034	52.4253	90.6128	11.9351	60.6589	18.7574	4.78056	18.8981	4.39667	16.2934	3.57929	8.69287	5.64079
TN6P4 3	TN6P4	261.812	13.1413	67.1226	85.0874	13.2105	83.1856	22.7045	4.80546	30.5704	6.11188	17.9878	7.02358	12.8268	7.33142
TN6P4 4	TN6P4	222.133	10.5568	70.387	88.7761	12.9195	70.4699	14.2651	4.48547	16.4257	4.54369	14.2832	4.12304	12.8562	6.13183
TN6P4 5	TN6P4	227.172	10.4329	66.1882	86.9565	14.8083	69.5318	13.3677	4.32992	16.3065	4.33425	15.6034	4.68741	10.5525	6.02594
TN6P4 6	TN6P4	247.648	10.6116	71.9723	93.495	13.7754	78.1779	17.1283	4.50527	19.7628	3.96175	14.455	4.76504	14.6896	8.19482
TN6P4 7	TN6P4	272.533	16.3358	97.4256	134.13	18.6556	106.191	20.3575	4.72083	15.9185	4.62659	15.953	4.9593	16.5861	13.4593
TN6P4 8	TN6P4	231.109	13.6984	74.7669	99.0116	15.5883	74.8484	14.6177	4.36186	15.088	4.77872	15.5498	4.18943	19.1734	10.5828
TN7F 1	TN7F	1274.07	7.55079	433.617	704.851	74.5936	360.601	85.5757	28.2713	164.182	23.9446	50.2899	2.24254	8.76658	1.91201
TN7F 2	TN7F	1204.25	9.03559	387.882	575.177	68.6808	331.732	82.1734	25.7566	135.722	21.2753	48.9033	3.64117	10.2517	1.77053
TN7F 3	TN7F	1246.86	8.74179	410.103	599.487	72.6398	362.567	86.5718	26.7241	146.675	22.4138	49.7842	3.23819	9.97394	2.21701
TN7G 1	TN7G	1269.36	6.80864	363.362	731.109	60.6384	312.873	75.8945	24.2111	149.749	23.3022	53.5321	3.01477	9.16605	1.51223
TN7G 2	TN7G	1308.05	7.46033	381.386	793.374	64.8265	330.813	72.7157	25.867	164.515	24.4061	58.2458	2.70695	9.96811	1.25551
TN7G 3	TN7G	1073.73	7.51197	319.296	595.23	53.7142	263.392	65.7165	19.7913	132.407	18.7363	46.679	3.05371	8.76898	1.17376
TN7G 4	TN7G	1241.22	8.2188	442.64	910.764	72.8753	369.846	91.5526	24.6952	129.379	23.7364	57.8464	2.29397	11.5045	2.38388
TN7G 5	TN7G	1125.95	5.49494	366.078	725.488	57.8041	335.469	74.4951	21.3015	117.262	21.385	58.3456	3.70624	11.812	1.44174
TN7G 6	TN7G	944.802	4.82899	285.526	636.795	48.4053	253.456	68.7735	16.0869	94.11	16.9678	53.0841	2.51654	8.8294	0.875114
TN7G 8	TN7G	1304.76	7.40634	431.124	853.777	69.5713	390.42	94.1134	22.6712	130.688	23.8497	74.1075	2.41511	13.5681	3.20991
TN7G 9	TN7G	1252.1	7.90235	422.398	949.464	73.4831	400.515	88.2137	23.1433	131.548	24.848	72.7847	2.06708	13.0179	2.6961
TN7H+ 1	TN7H+	1514.02	8.23094	384.844	790.067	67.1795	335.82	81.4785	29.7705	206.529	27.8158	59.1023	3.51204	9.72971	1.576
TN7H+ 10	TN7H+	1403.07	4.36406	531.232	1314.41	89.5595	455.454	107.503	32.0316	146.494	26.2776	78.5772	1.77983	13.9989	3.25507
TN7H+ 11	TN7H+	1638.62	9.09816	552.076	1379.73	93.6049	490.647	116.887	31.1527	166.574	29.9222	83.4009	1.74575	15.0988	3.67415
TN7H+ 12	TN7H+	1835.8	9.7886	600.071	1305.42	98.6511	540.541	124.955	31.3206	179.245	33.3331	93.8421	2.48554	16.7513	2.72479
TN7H+ 13	TN7H+	690.819	5.13029	221.671	482.369	37.8087	201.928	48.7554	12.1514	64.6696	13.1586	36.843	1.02119	8.32891	2.29897
TN7H+ 14	TN7H+	824.744	6.43902	268.879	567.917	42.657	239.037	58.0081	13.9383	78.2965	15.1096	45.2437	1.36999	10.2504	1.69507
TN7H+ 15	TN7H+	829.869	4.98537	273.101	593.444	45.2037	256.628	62.6885	14.5756	80.0191	15.2373	45.0077	2.09264	9.50256	1.76183
TN7H+ 2	TN7H+	1667.06	8.48155	408.399	825.072	70.6747	353.775	95.5469	31.9689	221.799	29.7261	63.4505	4.54624	10.1621	1.67315
TN7H+ 3	TN7H+	1627.55	8.89163	417.041	792.705	67.6591	360.45	88.1849	30.828	205.661	31.0443	66.854	3.7411	10.096	1.20428
TN7H+ 4	TN7H+	50.9368	4.51177	34.7378	74.8535	8.7876	36.2987	6.33102	3.1162	13.849	1.49057	2.81767	2.36862	2.93539	2.60961
TN7H+ 5	TN7H+	40.5729	5.88465	25.6596	55.668	6.6792	27.5664	4.50985	1.53189	9.96983	1.12861	2.12997	3.14864	3.14219	2.02788
TN7H+ 6	TN7H+	40.1078	3.41906	23.8725	49.9598	5.96727	23.0762	5.6321	1.43431	6.93831	2.07739	1.45	2.18902	3.38688	1.78113
TN7H+ 7	TN7H+	48.9899	4.65593	32.6031	69.3955	8.00022	37.5328	8.89291	1.61878	8.16427	1.22143	2.74741	3.21525	4.25181	4.20375
TN7H+ 8	TN7H+	43.0632	4.30691	29.3208	59.0374	6.79089	32.8403	5.4253	1.50326	10.7601	0.757179	2.85798	3.06301	3.55252	2.8497
TN7H+ 9	TN7H+	48.0225	4.8283	30.3418	70.5786	6.68436	30.7106	6.79105	1.29528	7.41821	1.25518	1.72002	3.43745	3.60553	3.00791
TN8P1 2	TN8P1	510.619	11.1355	34.0311	64.5791	8.30909	50.122	21.047	7.26624	55.7432	10.9237	41.6926	4.95893	12.4811	17.7828
TN8P1 3	TN8P1	457.116	8.51405	32.367	74.5124	7.30786	44.4945	19.889	5.62225	50.3448	9.76429	36.7079	4.14392	10.6198	16.5619
TN8P1 5	TN8P1	368.863	8.11985	31.5266	78.1413	6.00389	36.3418	14.1194	5.34095	41.418	7.75689	35.6644	4.65749	8.76413	13.0196
TN8P2 1	TN8P2	312.058	6.4941	17.2183	32.3698	4.51099	27.8449	14.0502	4.86834	25.833	7.09947	28.996	2.51968	5.37337	11.322
TN8P2 2	TN8P2	342.835	7.08666	18.9303	36.0114	4.76934	31.1272	14.9117	5.43802	29.3115	7.78357	30.6601	2.89569	6.09749	11.0573
TN8P2 3	TN8P2	289.157	6.85078	16.2776	31.5081	4.33844	27.978	13.2806	4.66595	25.822	6.71622	27.071	2.54565	5.10044	10.1838
TN8P2 4	TN8P2	311.75	6.901	20.3007	38.2667	5.10376	29.9342	13.3	4.55367	24.016	6.94571	27.2347	3.09897	6.69984	11.4925
TN8P2 5	TN8P2	308.409	6.84296	20.0034	37.9478	5.07542	29.9341	13.7832	4.56279	23.9321	6.89385	27.5782	2.78665	6.33032	11.9222
TN8P2 6	TN8P2	366.741	6.98131	22.3817	43.1755	5.43788	32.9256	15.0307	5.26713	28.1505	8.87551	31.1969	3.04574	7.76295	12.7741
TN8P2 7	TN8P2	307.248	6.67879	19.9936	40.3232	5.07208	28.4481	12.2761	4.26424	22.1785	6.39053	24.015	2.65082	6.20377	11.6382
TN8P2 8	TN8P2	310.586	6.38598	18.7617	37.7993	4.74516	25.8375	12.9429	5.49709	23.2397	6.23362	24.4668	2.74812	6.27226	12.2428
TN8P2 9	TN8P2	272.857	6.28943	19.5315	39.8663	5.13268	27.5656	12.3025	3.96877	20.1579	5.90282	22.7152	2.59208	6.03649	11.8968
TN9P2 1	TN9P2	458.412	6.99372	22.0289	49.0953	6.18226	32.5698	15.5276	6.9961	39.0929	8.983	26.9002	4.18338	6.60659	10.1064
TN9P2 2	TN9P2	451.249	8.56368	23.0835	41.7372	5.57916	31.7078	13.9294	5.84685	43.1242	8.57757	24.6816	3.33698	5.27172	8.75035
TN9P2 3	TN9P2	449.255	7.34684	24.8839	45.0716	6.00494	32.0963	12.633	6.6022	42.8325	9.02301	27.3967	4.51376	6.19667	9.15712
TN9P2 4	TN9P2	519.524	11.9442	31.912	54.5076	7.05656	41.939	17.8389	7.28968	41.3145	10.7642	38.0111	4.91314	10.0614	14.793
TN9P2 5	TN9P2	451.786	9.10963	27.4359	51.5561	6.25559	38.3475	22.6686	7.0412	42.4948	10.8725	31.3012	5.00988	9.43775	13.334
TN9P2 6	TN9P2	568.152	9.40124	33.6753	61.8914	8.70767	42.8564	25.3413	7.83966	52.6089	11.347	45.6693	4.54292	7.80295	16.2341
TN9P3 2	TN9P3	692.175	13.8533	42.9129	77.5438	10.7915	57.85	26.5162	8.69083	69.4918	15.1094	57.0977	6.01059	16.4638	27.0261
TN9P3 3	TN9P3	682.882	13.1	44.1415	78.9762	10.2138	60.0365	26.033	8.98579	70.1218	15.3442	58.2199	6.62464	15.8744	25.9415
TN9P3 4	TN9P3	614.901	17.5448	38.5105	68.5011	9.28153	49.3052	22.8926	7.62471	57.807	14.0846	50.4585	6.01559	14.1777	28.0642
TN9P3 5	TN9P3	648.799	11.7554	39.8686	71.2077	8.93812	52.257	21.3937	7.63906	63.3375	13.5075	53.3954	5.1688	14.7452	23.9398
TN9P3 6	TN9P3	641.759	15.6538	38.925	68.8408	9.18537	52.1323	22.929	7.4464	61.9935	13.6813	51.5919	5.03432	14.1541	23.1398
TN9P3 7	TN9P3	599.414	12.3547	38.4919	67.5726	9.95968	47.8437	18.9833	8.40753	60.7277	12.7228	50.7339	5.78962	15.1459	23.8765
TN9P3 8	TN9P3	656.336	12.5262	41.5078	70.7994	9.96848	57.1944	18.2903	8.32754	62.3794	14.5227	53.2442	4.92864	14.6563	24.2125
TN9P3 9	TN9P3	694.881	13.017	43.58	78.2934	10.7567	55.7824	24.8356	9.1729	70.6086	15.3736	58.4217	5.93966	14.8326	24.9721
TN9P4 1	TN9P4	853.352	18.0863	48.7445	110.478	11.8841	80.8192	32.9449	10.6771	80.0548	19.1465	67.0155	5.44403	16.6264	27.3736
TN9P4 3	TN9P4	777.78	15.4575	62.3023	122.71	14.6806	76.2112	36.4571	10.6534	78.0314	16.3317	56.5315	6.77258	16.9555	27.4593
TN9P4 4	TN9P4	464.737	8.07704	50.9607	58.4058	6.62332	34.1255	21.1773	11.6677	53.4393	13.2273	29.8484	1.91711	10.7731	21.0586
TN9P4 6	TN9P4	944.342	17.0647	58.6025	131.152	15.5407	82.8931	41.5263	14.0794	104.405	20.2372	74.1675	7.34403	19.1302	27.5518
TS10P1 1	TS10P1	856.694	15.6864	54.689	110.074	16.0642	75.4597	37.7502	13.1769	97.1918	19.2234	65.835	6.48878	16.1481	28.205
TS10P1 1 bis	TS10P1	856.694	15.6864	54.689	110.074	16.0642	75.4597	37.7502	13.1769	97.1918	19.2234	65.835	6.48878	16.1481	28.205
TS11P1 1	TS11P1	55.7026	11.0616	108	489.016	26.8023	125.792	22.5504	5.02256	28.7632	4.05121	8.01784	5.897	35.0738	10.4189
TS11P1 2	TS11P1	41.6822	11.2083	92.7471	183.916	24.1538	106.329	20.2393	3.40833	24.9873	4.78748	4.91499	5.63488	24.2388	6.44063
TS11P1 bis 1	TS11P1	40.2793	5.52477	62.2916	233.442	15.7439	84.8883	18.0346	2.83036	14.871	1.31236	4.3824	2.84174	13.6214	2.99392
TS11P1 bis 2	TS11P1	44.9207	7.82102	93.7109	408.141	23.4378	98.8903	18.2855	3.6677	17.8322	2.16442	4.67208	3.87281	18.8539	4.60898
TS11P1 bis 3	TS11P1	32.8707	7.76361	76.8851	163.071	21.0507	83.0163	16.0309	3.33402	16.8545	1.62219	3.01175	6.3181	16.5844	4.41946
TS11P2 1	TS11P2	494.002	9.31956	33.4772	61.8208	7.42757	45.2642	23.5131	7.30493	54.2521	11.6888	40.3894	3.91451	10.8678	21.0789
TS11P2 2	TS11P2	423.318	9.22162	29.773	60.05	7.39625	41.6397	18.0281	6.98173	46.3975	9.65039	35.1318	4.1472	9.98468	18.9712
TS11P2 4	TS11P2	448.451	9.77381	32.4837	66.9311	8.22254	42.2699	21.0463	7.54702	48.1429	9.41712	40.6265	4.8482	9.91249	14.8556
TS11P2 5	TS11P2	361.165	9.32595	27.7605	53.017	6.96268	34.2279	14.3809	5.11099	39.0599	7.42383	30.6243	4.68013	9.44171	12.8264
TS11P2 6	TS11P2	645.812	13.5207	41.8037	81.5684	10.9329	59.1131	28.6051	9.85859	67.0093	14.5099	51.0181	6.21099	12.8389	23.506
TS11P2 bis 1	TS11P2	335.569	6.3288	19.2691	35.7304	4.45097	27.4474	13.2465	5.04109	30.9581	7.22477	23.1329	2.48321	5.54262	8.53753
TS11P2 bis 2	TS11P2	333.985	6.94206	18.9925	34.2503	4.84981	24.4823	11.5508	4.88529	31.6331	6.74666	23.2744	2.62695	5.82	8.41916
TS11P2 bis 3	TS11P2	233.982	4.02961	14.9783	52.8353	3.363	17.3695	10.0125	3.17654	21.6504	4.77277	16.9943	7.2326	4.33319	4.96036
TS11P2 bis 4	TS11P2	268.556	5.59303	17.0872	34.2247	4.18856	22.746	10.879	4.19343	25.1957	5.74145	21.6934	2.68771	5.45867	9.21918
TS11P2 bis 5	TS11P2	248.975	6.03298	17.8902	31.8756	4.46548	21.1472	10.3715	3.45889	20.4508	5.16989	18.8052	3.72248	5.86252	6.93124
TS11P3 1	TS11P3	607.363	11.048	37.1242	69.8348	8.85403	53.0146	25.5468	7.76903	60.4609	12.9973	49.7373	5.70736	14.0607	22.8473
TS11P3 5	TS11P3	570.981	11.365	35.8731	65.8217	8.63461	46.5098	21.1238	6.69721	57.0659	11.981	44.7064	5.11246	11.5192	18.7805
TS11P3 6	TS11P3	611.758	12.0377	37.802	70.2467	8.90391	50.7595	27.3685	7.79985	60.0857	13.0071	45.7732	4.97744	12.5353	21.7358
TS11P3 8	TS11P3	584.227	11.3907	36.7905	66.6094	8.86814	46.9029	22.1405	7.27137	57.3649	12.7804	43.8462	5.88863	12.4639	18.9599
TS6P1 1	TS6P1	360.132	12.73	46.688	90.0933	11.2192	55.5511	17.6859	5.68002	34.2804	8.24496	38.6955	5.42648	12.6227	20.7371
TS6P1 2	TS6P1	280.081	10.6242	39.7602	77.8545	9.69941	46.8377	15.6501	4.46503	29.2341	6.88529	31.9511	4.44764	11.0292	18.3661
TS6P1 3	TS6P1	320.493	12.3002	46.3091	91.0444	11.2651	54.8548	18.7027	5.01856	33.2191	8.03419	35.4423	5.02248	12.8454	21.7633
TS6P1 4	TS6P1	339.704	12.3039	42.1669	85.7147	10.7369	50.4489	15.5188	4.76408	32.5447	7.522	36.7364	4.79758	12.1099	19.755
TS6P1 5	TS6P1	283.261	11.2232	37.7226	77.3088	9.47497	45.0456	15.7075	4.42062	28.0439	6.49743	30.7168	4.16359	10.9063	18.6765
TS6P1 6	TS6P1	264.413	10.4521	35.8476	72.8233	9.01037	44.0708	12.909	4.24999	27.1596	6.27962	28.6035	4.06996	10.422	16.8314
TS6P1 7	TS6P1	357.524	12.0277	49.0058	97.0991	11.5665	57.3898	18.5308	5.02254	37.7053	8.59231	40.7019	5.57732	12.5786	22.8804
TS6P1 8	TS6P1	349.895	12.9027	48.3523	101.202	12.8667	62.4793	19.8744	5.30306	34.6293	8.00886	39.6047	5.00815	13.3284	23.4
TS6P1 9	TS6P1	334.042	12.1013	46.7733	92.6336	11.2102	53.8111	17.8366	4.78325	36.385	7.92626	36.4325	6.22347	12.9104	21.2794
TS6P2 1	TS6P2	251.55	8.94143	26.817	46.7137	6.17095	33.4052	11.8998	3.95683	26.4004	6.02991	26.025	4.4021	8.58045	7.64716
TS6P2 2	TS6P2	285.527	8.22149	30.3602	52.1163	6.86011	38.0311	13.3278	4.36502	29.8306	6.98417	28.8875	5.16395	9.47825	7.66431
TS6P2 3	TS6P2	288.853	9.39527	28.9159	50.5034	7.11815	36.5845	12.4932	4.29169	28.157	6.27423	27.2853	4.77168	9.82566	8.28646
TS6P2 4	TS6P2	261.999	9.09737	31.6262	66.4569	7.14751	35.9091	12.5988	3.59713	23.5181	6.04021	24.3331	4.1975	9.25351	7.90224
TS6P2 5	TS6P2	287.927	8.99215	32.0516	56.9453	7.54144	36.7716	12.4049	3.86354	24.2429	6.4651	25.1885	4.76822	10.0425	9.45031
TS6P2 6	TS6P2	245.014	9.25031	29.2891	52.6744	6.5875	32.7737	10.4418	3.15967	22.6374	5.32179	22.3999	4.08825	8.63948	7.62091
TS6P3 2	TS6P3	296.555	8.95132	28.1889	52.0091	6.73725	35.0254	12.6741	4.53722	25.5716	6.79773	29.0203	4.65649	9.71918	8.63447
TS6P3 4	TS6P3	320.723	8.69738	31.8527	68.058	7.00535	35.8504	13.2849	4.13991	26.0719	7.2856	29.7471	5.0104	10.0221	12.3061
TS6P3 5	TS6P3	300.67	4.10069	33.6808	62.8929	6.54283	36.7644	11.5723	3.53148	24.0159	6.33036	28.1368	4.26255	12.081	10.7998
TS7P1 1	TS7P1	498.149	10.0004	29.4557	62.1387	8.78893	47.0173	22.6711	7.21581	52.5877	11.9447	38.7184	3.06537	9.27215	16.807
TS7P1 3	TS7P1	501.784	8.46262	29.0085	59.8154	7.70567	44.6238	22.7896	7.264	52.2745	11.1384	39.4307	4.11512	9.74902	17.0685
TS7P1 5	TS7P1	461.066	9.89127	27.2991	56.3397	7.24172	40.9483	20.3918	6.74387	48.8029	10.3929	38.7583	3.04632	9.27554	16.487
TS7P1 6	TS7P1	443.886	8.20601	25.8709	56.9333	7.40599	38.0815	19.4591	6.44216	47.088	9.52061	36.6149	3.023	8.50518	17.1007
TS7P1 8	TS7P1	494.545	8.93735	30.7206	58.0576	7.49713	43.8297	21.9454	6.7911	54.1419	11.5653	37.6336	3.32353	8.73051	16.6907
TS7P1 9	TS7P1	476.136	8.27178	27.815	54.2114	6.96098	43.0018	22.2685	6.82799	53.1436	10.6015	37.391	3.20819	9.55694	16.9715
TS7P2 1	TS7P2	391.794	9.04972	28.9426	47.3323	5.10458	35.4635	21.3929	6.79677	16.6034	9.09919	32.7857	2.3555	8.39611	13.0559
TS7P2 2	TS7P2	372.448	7.92684	24.0942	48.6549	6.49622	37.3343	17.1856	8.0632	17.6456	7.97179	28.449	3.08628	7.15683	12.3708
TS7P2 3	TS7P2	360.94	8.11962	20.3589	37.9063	4.34231	28.1595	20.9835	6.36542	15.9349	9.45012	28.5925	2.77385	7.11468	11.317
TS7P2 4	TS7P2	401.761	7.14562	24.0999	45.4385	5.15197	33.6219	19.8688	6.33839	17.46	8.92627	29.4292	3.20123	8.79046	14.3713
TS7P2 5	TS7P2	357.11	6.86101	23.2187	45.9237	6.38903	34.1639	19.6101	6.32092	15.0658	8.25103	32.6925	3.29678	7.81777	12.9028
TS8P1 1	TS8P1	906.514	6.16041	292.343	470.027	54.3645	310.374	78.036	21.3235	99.1219	26.4938	49.1789	2.73846	7.34619	1.9209
TS8P1 3	TS8P1	656.938	5.57939	242.743	402.144	43.8719	233.68	69.2544	18.6216	65.4743	17.1511	51.5944	2.23047	6.37193	1.83205
TS8P1 4	TS8P1	857.461	4.03781	306.239	502.032	53.576	281.819	79.6391	18.0775	63.8385	17.2884	52.3973	2.03109	8.49464	2.60519
TS8P1 5	TS8P1	730.702	4.89683	264.706	427.655	46.51	247.424	58.1644	15.4226	57.4487	16.8249	41.7713	1.35918	7.37681	1.75926
TS8P1 6	TS8P1	897.123	6.32742	329.247	537.557	59.2585	325.054	79.1913	19.3774	74.6525	20.5855	46.5434	2.53057	9.66865	2.6104
TS8P2 1	TS8P2	58.3677	7.79612	38.0801	120.463	11.0583	58.0512	13.6325	3.89086	18.0661	3.48474	6.97872	3.40617	5.84576	8.27711
TS8P2 2	TS8P2	58.4237	7.41625	37.4921	112.574	10.1216	57.8166	12.4006	3.95521	17.9398	3.57312	7.05422	2.63965	3.97525	5.14331
TS8P2 3	TS8P2	58.9018	6.83546	37.6316	125.234	11.8373	49.7617	9.51679	3.80197	16.3487	3.64903	5.69262	2.30353	6.98463	5.54739
TS8P2 4	TS8P2	47.7509	5.00584	44.123	117.933	10.1255	52.6098	11.3703	3.16915	11.3531	2.5724	6.01047	2.24908	6.75098	5.57507
TS8P2 6	TS8P2	51.906	4.98369	39.6391	106.694	8.33327	46.4195	8.04423	3.03133	11.6998	2.16617	6.40079	2.93949	4.65677	5.15479
TS8P3 1	TS8P3	919.757	7.51491	382.977	296.671	73.7339	384.088	90.4202	23.5872	98.0218	21.3771	38.9783	2.48616	14.9667	2.82349
TS8P3 2	TS8P3	855.588	6.80183	385.405	287.105	68.704	363.184	79.0275	21.1564	94.3148	20.6867	37.2363	2.01154	13.8868	2.23696
TS8P3 3	TS8P3	834.406	6.06759	404.301	317.564	72.2239	386.901	86.8012	21.0851	95.809	21.3436	38.3532	1.4591	14.6278	2.49686
TS8P3 4	TS8P3	719.941	5.39034	356.333	274.483	63.7922	331.648	76.2127	17.0341	69.3202	17.9755	29.8866	1.33666	13.0582	2.64539
TS8P3 5	TS8P3	759.363	5.67759	366.625	274.219	65.2601	355.696	88.5075	18.0243	73.4326	18.1007	34.0177	1.4198	15.7707	2.7719
TS8P3 6	TS8P3	632.981	4.94547	312.778	232.909	56.2722	306.683	71.2644	15.4931	57.6452	15.033	27.7668	1.05217	12.9529	2.04281
TS8P4 1	TS8P4	64.4418	6.34095	40.304	128.796	12.5171	53.3889	11.5144	3.79095	14.4059	3.81164	9.56302	5.19449	17.0069	4.68475
TS8P4 2	TS8P4	57.7179	6.30465	35.8101	102.314	10.1905	46.6948	13.6407	3.07537	12.4796	2.64853	5.75587	4.53839	17.5479	4.23949
TS8P4 3	TS8P4	64.0624	4.32443	44.5617	159.486	12.4794	56.9788	16.1617	4.50322	16.7169	3.66081	6.2532	4.27288	19.5016	5.35219
TS8P4 4	TS8P4	62.931	7.41175	49.6567	141.18	13.8643	60.2029	19.1028	3.82208	15.1729	2.36585	7.81642	3.68219	24.4091	6.63385
TS8P5 2	TS8P5	109.941	11.4308	91.2974	268.639	26.6431	119.529	28.141	5.79045	23.0325	4.20816	12.6056	6.11548	36.6406	11.3173
TS8P5 3	TS8P5	161.716	17.7536	124.676	371.349	37.5504	165.468	35.9339	8.02883	34.8206	4.69267	15.0786	7.86349	50.6689	20.2623
TS8P5 4	TS8P5	100.979	12.1779	82.9478	258.861	23.5346	105.384	24.6637	5.33783	22.3604	3.77049	11.1056	6.36767	32.8574	11.1593
TS9P1 1	TS9P1	399.769	7.52345	23.658	43.1872	5.29869	33.6386	18.0293	6.40155	17.8009	9.1433	34.0972	3.14564	8.22797	11.6954
TS9P1 2	TS9P1	366.563	9.07232	17.9402	35.1046	6.16413	33.9759	14.5217	5.55754	13.4126	7.92857	30.2776	3.00584	5.98288	12.4538
TS9P1 3	TS9P1	310.788	5.25075	17.797	36.8525	4.76709	27.1431	14.23	5.23988	12.954	7.1227	23.6596	2.55826	5.49483	10.6719
TS9P1 4	TS9P1	312.381	5.91724	22.8832	42.6695	5.40986	35.0486	12.3747	5.03184	12.0148	7.27707	30.2109	2.19815	7.92275	13.8106
TS9P1 5	TS9P1	298.494	5.18428	18.3324	41.9199	5.22191	26.8141	13.7747	4.83282	9.81325	6.55889	25.8294	2.82354	6.53758	13.1132
TS9P2 1	TS9P2	308.614	6.2742	20.9712	37.3404	5.05675	29.003	13.4174	4.36498	33.0642	6.68287	25.0063	2.80853	6.7533	10.8215
TS9P2 2	TS9P2	501.484	8.61544	33.6288	55.3037	7.26147	44.9375	21.62	7.48271	52.3588	10.2419	35.0859	3.54071	11.1608	15.3089
TS9P2 3	TS9P2	451.821	7.52704	30.085	49.258	7.08471	41.3497	19.4062	6.53813	46.8146	9.8582	33.2305	2.97272	9.04782	11.7422
TS9P2 4	TS9P2	525.818	10.0313	35.3477	57.6062	8.37233	48.6471	23.4803	7.08229	52.5537	11.2962	43.3869	4.16601	12.1017	13.4197
TS9P2 5	TS9P2	544.176	10.5234	36.0475	57.551	8.67376	46.8876	23.3114	7.1906	56.1042	11.7379	43.0757	5.64486	11.6319	15.2434
TS9P2 6	TS9P2	373.618	7.29772	25.4875	42.3216	6.03001	34.7928	15.8964	5.29171	41.1961	8.83141	30.8406	3.36808	8.52811	11.3351
TS9P2 7	TS9P2	486.493	7.97332	31.8118	52.2389	13.0399	45.8783	20.0629	6.6847	50.2403	10.3107	38.0198	4.49018	9.56384	11.6874
TS9P2 8	TS9P2	653.997	10.8535	43.3824	67.0851	9.66141	55.8458	27.1782	11.5226	68.4879	13.3819	46.0382	4.51703	13.274	15.6592
TS9P2 9	TS9P2	693.393	12.3925	40.4489	70.8648	10.1168	55.7866	26.8207	7.88824	71.3724	13.9464	49.8544	6.73224	15.0086	18.4379
TS9P3 1	TS9P3	74.5892	9.155	64.1463	140.546	20.6774	94.171	20.7669	5.91953	33.9263	3.68944	6.98863	5.3899	16.6014	6.27805
TS9P3 2	TS9P3	77.5717	7.90923	67.6875	141.873	21.5273	95.8009	24.3338	6.54388	33.855	3.80006	8.60868	4.85004	16.8171	6.24634
TS9P3 3	TS9P3	70.7795	8.25266	63.355	139.974	20.9109	93.7786	19.7092	5.46111	31.1662	3.65527	7.18584	4.62363	16.2882	6.35843
TS9P3 4	TS9P3	76.9597	9.26418	59.7848	129.582	19.528	104.918	23.5012	9.73753	22.5446	3.23734	10.5608	3.86224	20.3851	7.58344
TS9P3 5	TS9P3	67.9926	8.34773	63.6518	144.067	19.948	91.4826	21.7752	4.80606	21.0324	3.04633	7.37798	4.75771	21.5905	9.211
TS9P3 6	TS9P3	75.7186	8.60794	77.6955	172.304	24.5244	112.207	26.2854	5.96581	25.6983	3.85624	8.76713	4.87944	24.7666	10.128
